# Supplementary material for: One-pot construction of diverse and functionalized isochromenoquinolinediones by Rh(iii)-catalyzed annulation of unprotected arylamides with 3-diazoquinolinediones and their application for fluorescence sensor
Source: Royal Society of Chemistry journal article supplement (doi:10.1039/c9ra03146d), 2019-01-01
Supplement: c9ra03146d1.pdf [file c9ra03146d1.pdf]

## SUPPORTING INFORMATION

# One-pot construction of diverse and functionalized isochromenoquinolinediones by Rh(III)-catalyzed annulation of unprotected arylamides with 3-diazoquinolinediones and their application for fluorescence sensor

Rajeev Shrestha,<sup>a†</sup> Hari Datta Khanal,<sup>a†</sup> and Yong Rok Lee<sup>a,\*</sup>

<sup>a</sup>School of Chemical Engineering, Yeungnam University, Gyeongsan 712-749, Republic of  
Korea. E-mail: yrlee@yu.ac.kr; Fax: +82-53-810-4631; Tel: +82-53-810-2529  
Republic of Korea

### TABLE OF CONTENTS

|          |                                                                                         |                |
|----------|-----------------------------------------------------------------------------------------|----------------|
| <b>1</b> | <b>H/D exchange experiment</b>                                                          | <b>S2</b>      |
| <b>2</b> | <b>Kinetic Isotope Effect (KIE) Study</b>                                               | <b>S3</b>      |
| <b>3</b> | <b><sup>1</sup>H NMR and <sup>13</sup>C NMR spectra of synthesized compounds (3-11)</b> | <b>S4-S37</b>  |
| <b>4</b> | <b>Figure S1</b>                                                                        | <b>S38</b>     |
| <b>5</b> | <b>X-Ray crystallographic structure and data of compound (3j)</b>                       | <b>S39-S49</b> |

## H/D exchange experiment

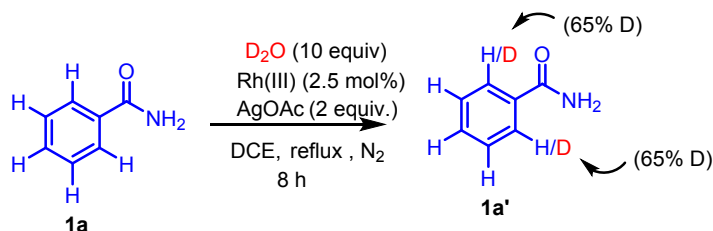

**Scheme S1.** Control experiment of H/D exchange.

Benzamide (**1a**) (0.2 mmol) was taken in an oven dried two-necked round bottomed flask and dissolved in 3 mL of anhydrous 1,2-dichloroethane (DCE). This was then followed by the addition of  $[RhCp^*Cl_2]_2$  (2.5 mol%), AgOAc (2 equiv) and  $D_2O$  (10 equiv) under nitrogen atmosphere. The reaction mixture was stirred under reflux condition for 8 h. Then, the solvent was removed *in vacuo* and the residue was purified by silica gel column chromatography (Hex: EtOAc = 1:1) to obtain **1a'**. The two ortho-H were deuterated with 65% each.

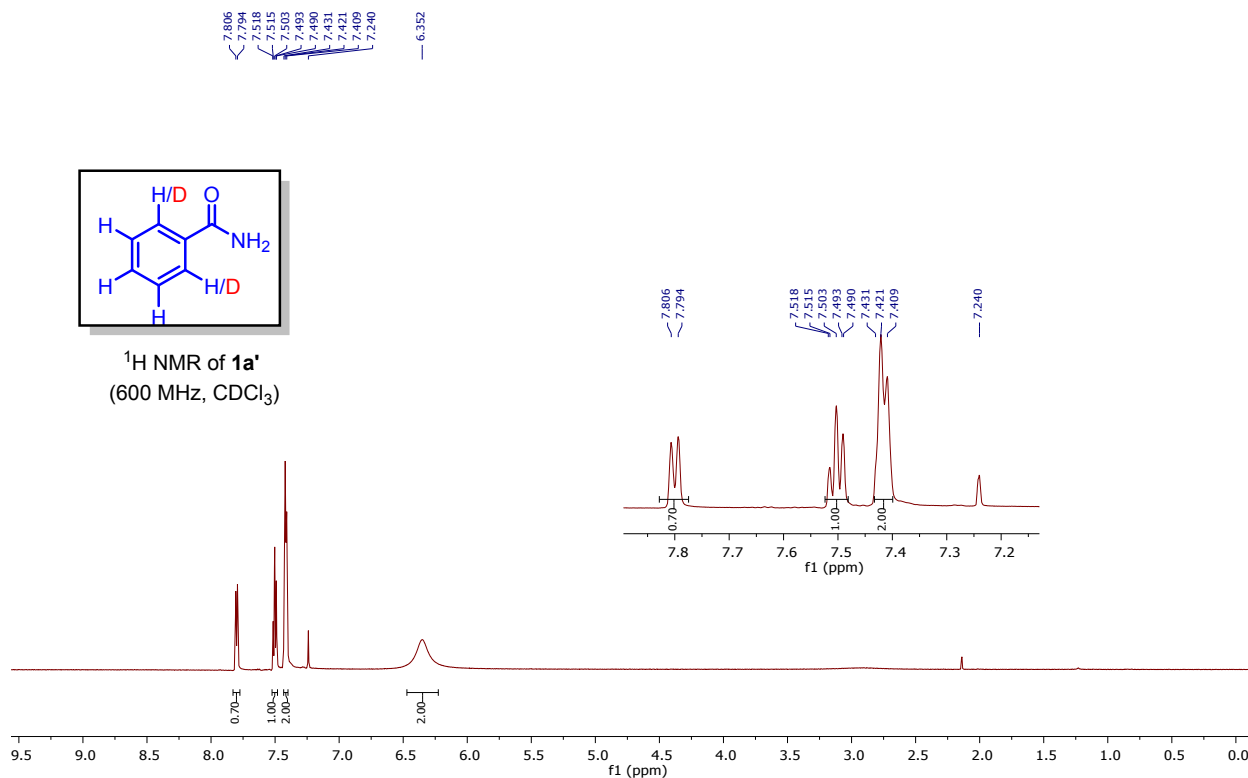

## Kinetic Isotope Effect (KIE) Study

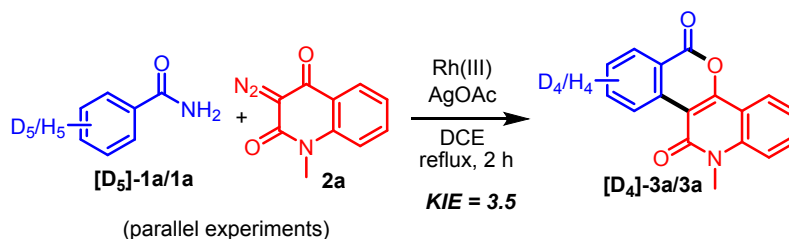

**Scheme S2.** Kinetic isotope effect study.

In an oven dried two-necked flask, a mixture of benzamide (**1a**) (0.2 mmol), and 3-diazo-1-methylquinoline-2,4(1*H*,3*H*)-dione (**2a**) (0.2 mmol) were dissolved in DCE (2 mL). This was then followed by addition of [RhCp\*Cl<sub>2</sub>]<sub>2</sub> (2.5 mol%), and AgOAc (2.0 equiv.) under nitrogen atmosphere. In another reaction flask, benzamide-2,3,4,5,6-d<sub>5</sub> (**[D<sub>5</sub>]-1a**) (0.2 mmol) was used instead of **1a**. The two reaction mixtures were stirred under reflux condition for 2 h. The reaction mixture were then cooled to room temperature. The reaction mixtures were combined, the volatiles were removed *in vacuo* and the product **[D<sub>4</sub>]-3a/3a** was isolated by silica gel column chromatography (Hex: EtOAc = 1:5) in 30% combined yield (34 mg). The value of  $K_H/K_D$  was calculated based on <sup>1</sup>H NMR. Here,  $K_H/K_D = 0.78/(1.0-0.78) = 3.5$ . HRMS was measured for **[D<sub>4</sub>]-3a/3a**. HRMS  $m/z$  ( $M^+$ ): calcd for C<sub>17</sub>H<sub>7</sub>D<sub>4</sub>NO<sub>3</sub>: 281.0990; found: 281.0992.

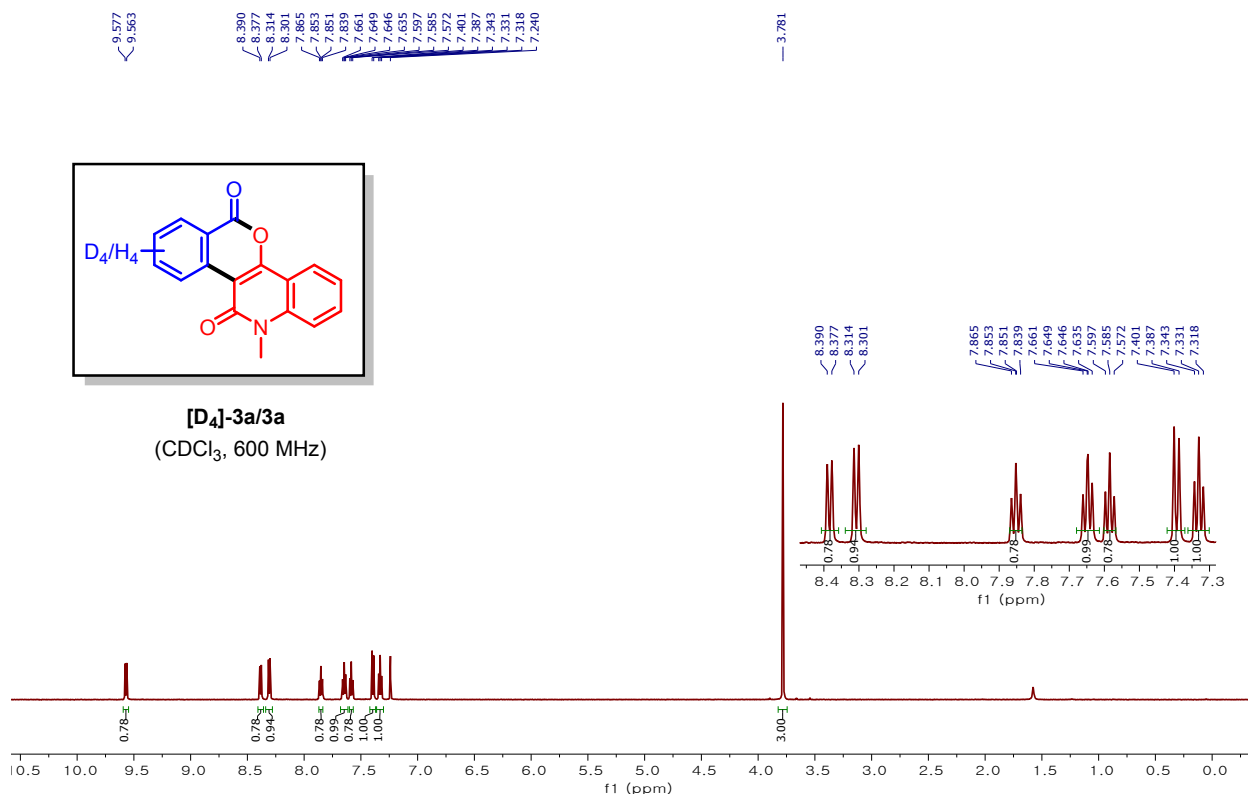

# <sup>1</sup>H NMR and <sup>13</sup>C NMR spectra of synthesized compounds (3-11)

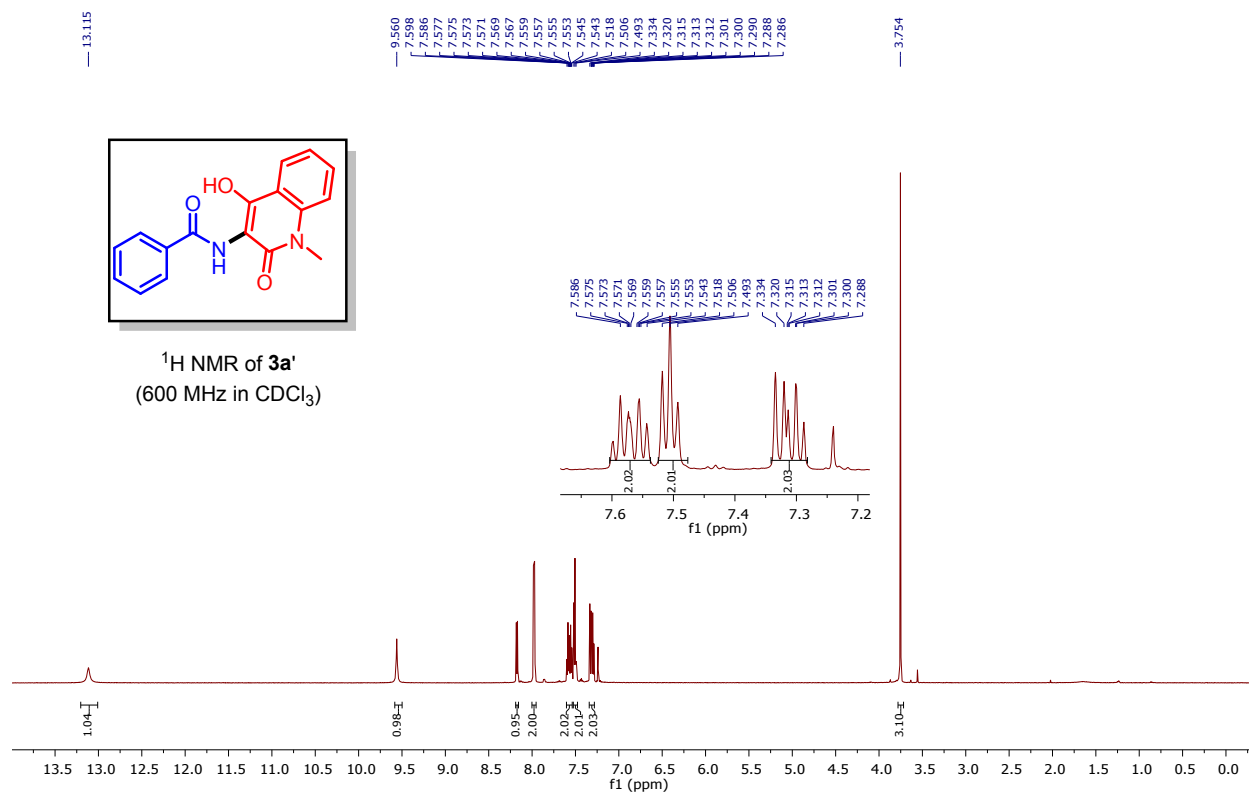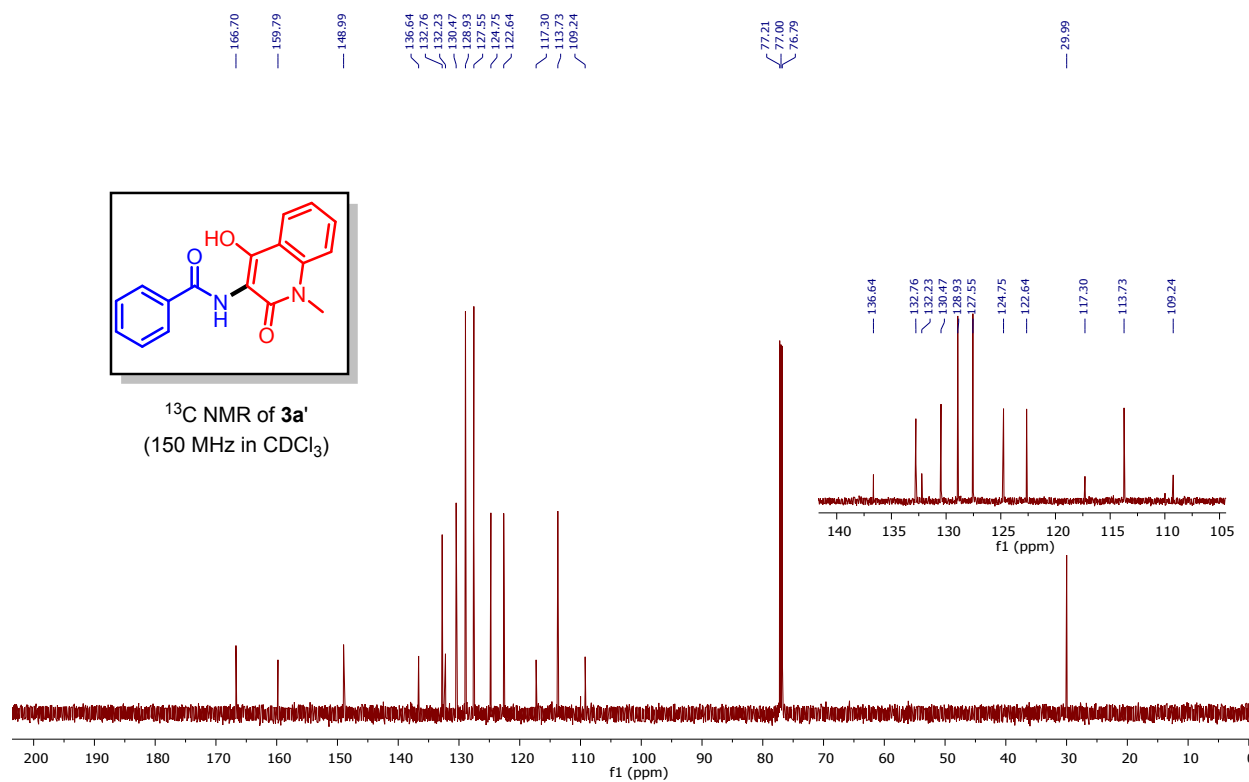

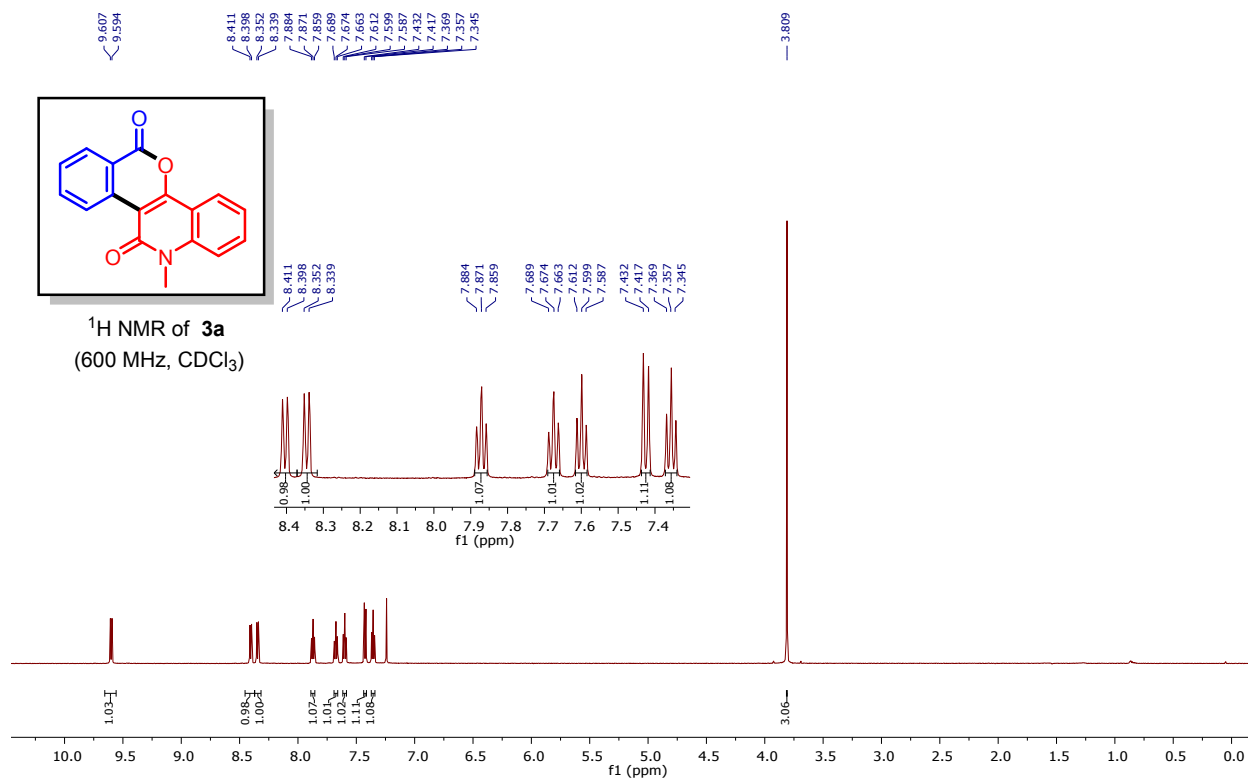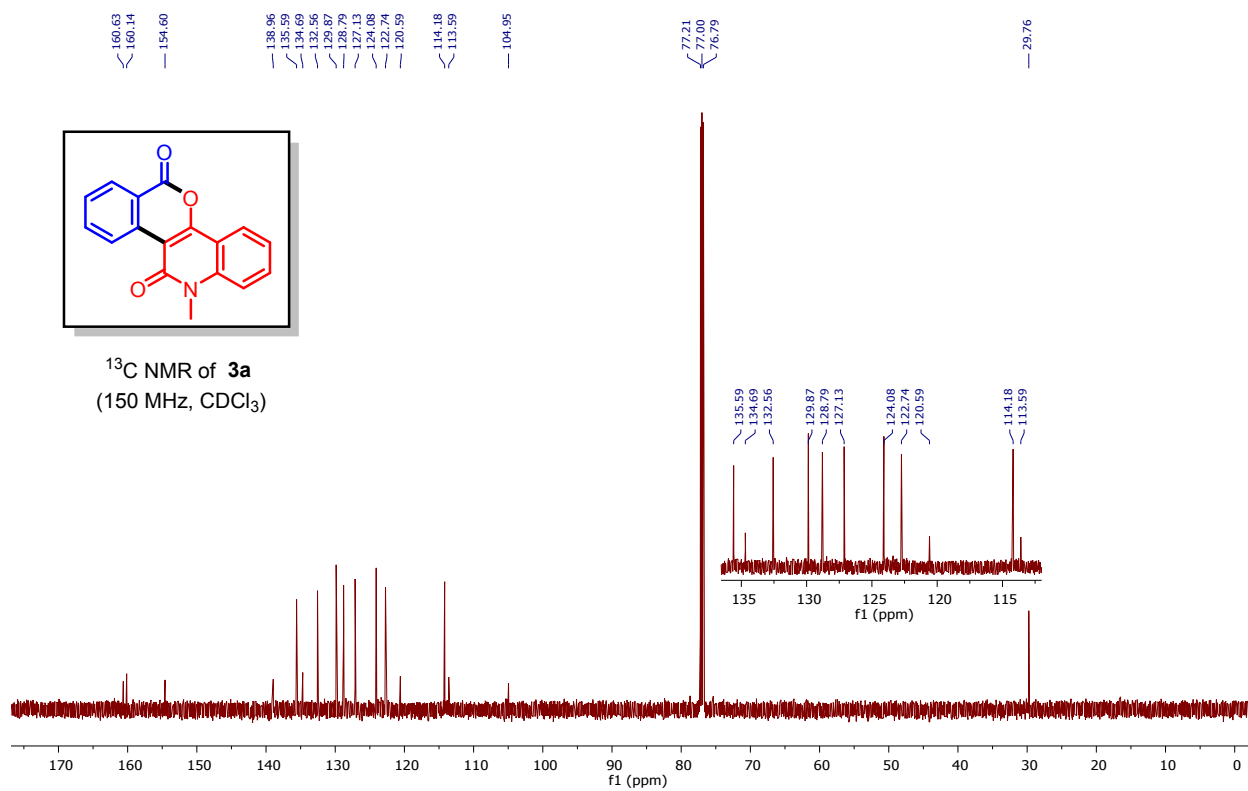

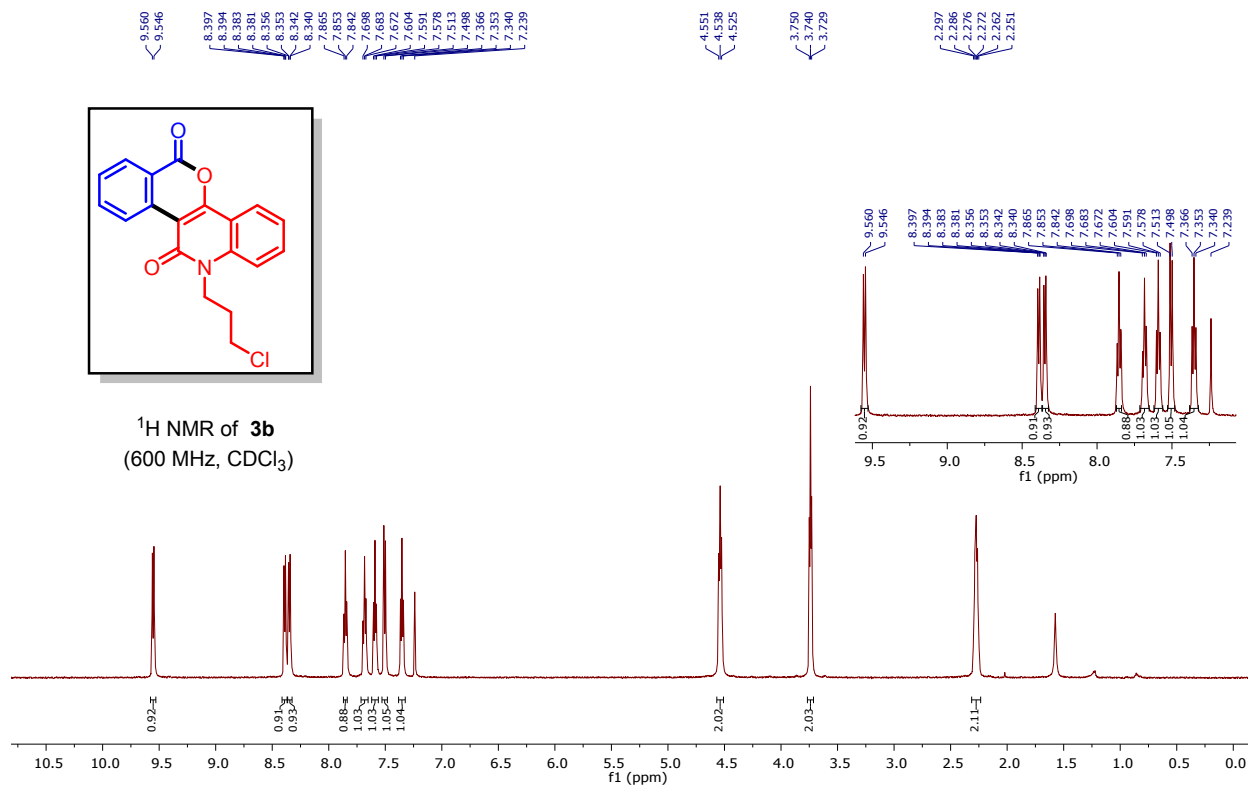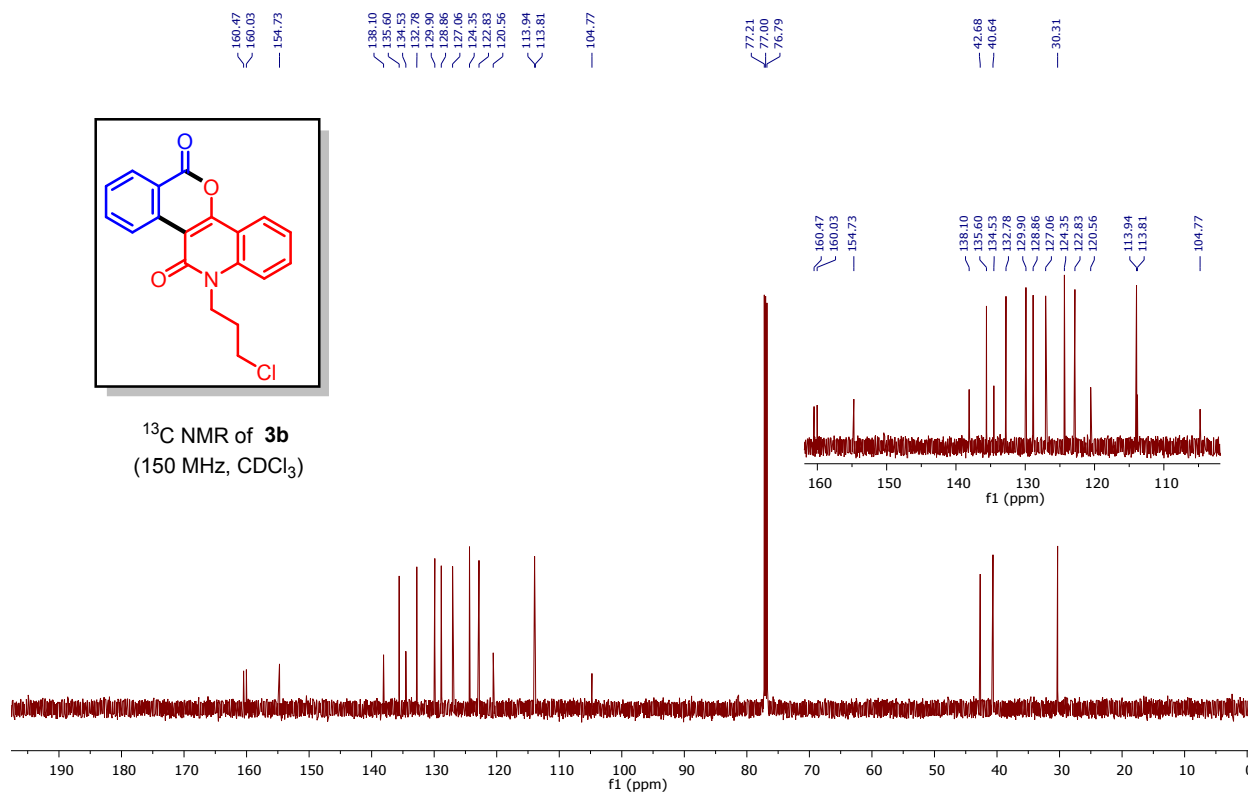

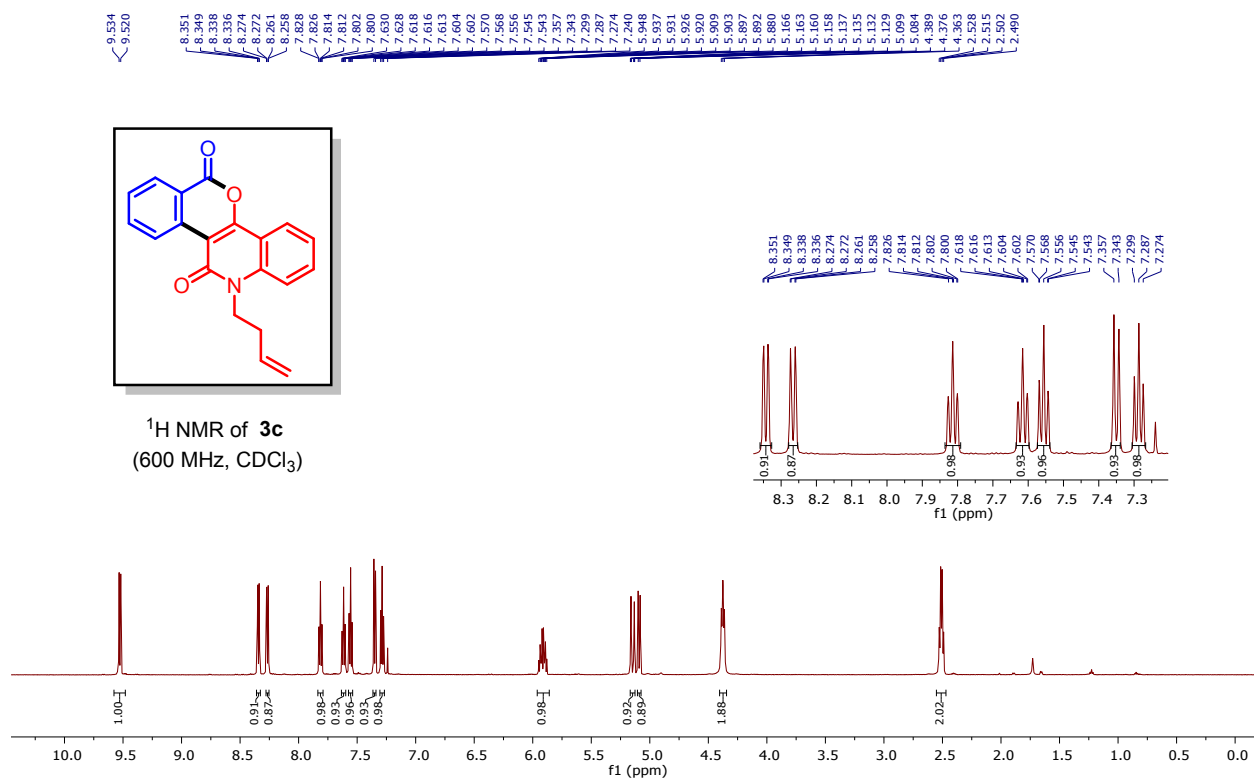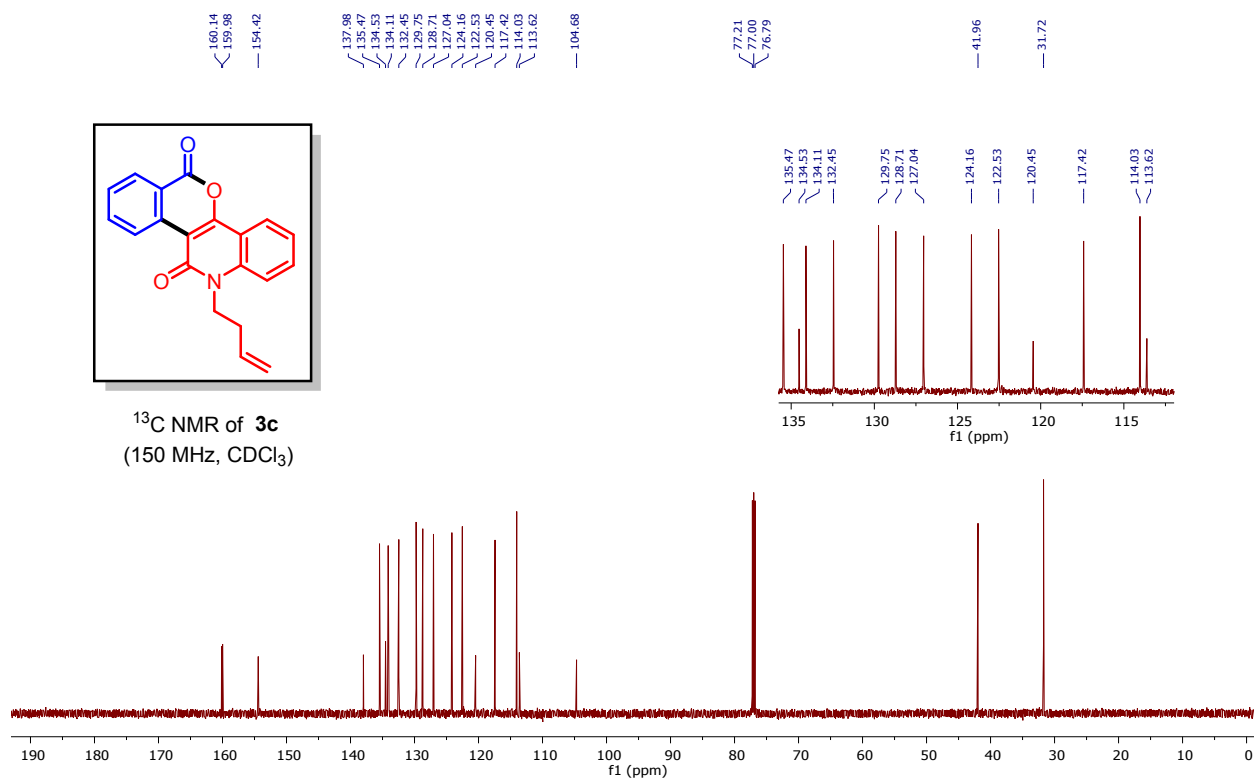

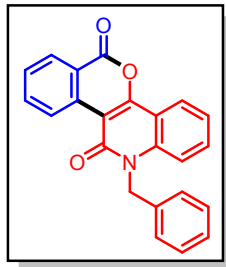

<sup>1</sup>H NMR of **3d**  
(600 MHz, CDCl<sub>3</sub>)

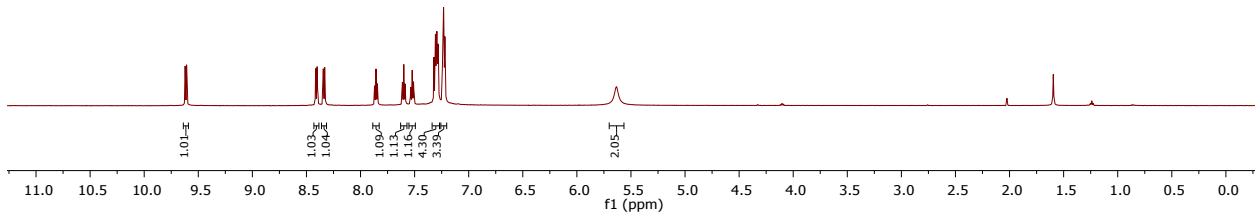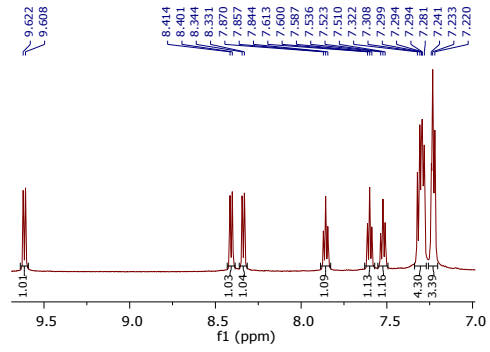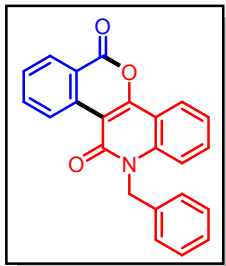

<sup>13</sup>C NMR of **3d**  
(150 MHz, CDCl<sub>3</sub>)

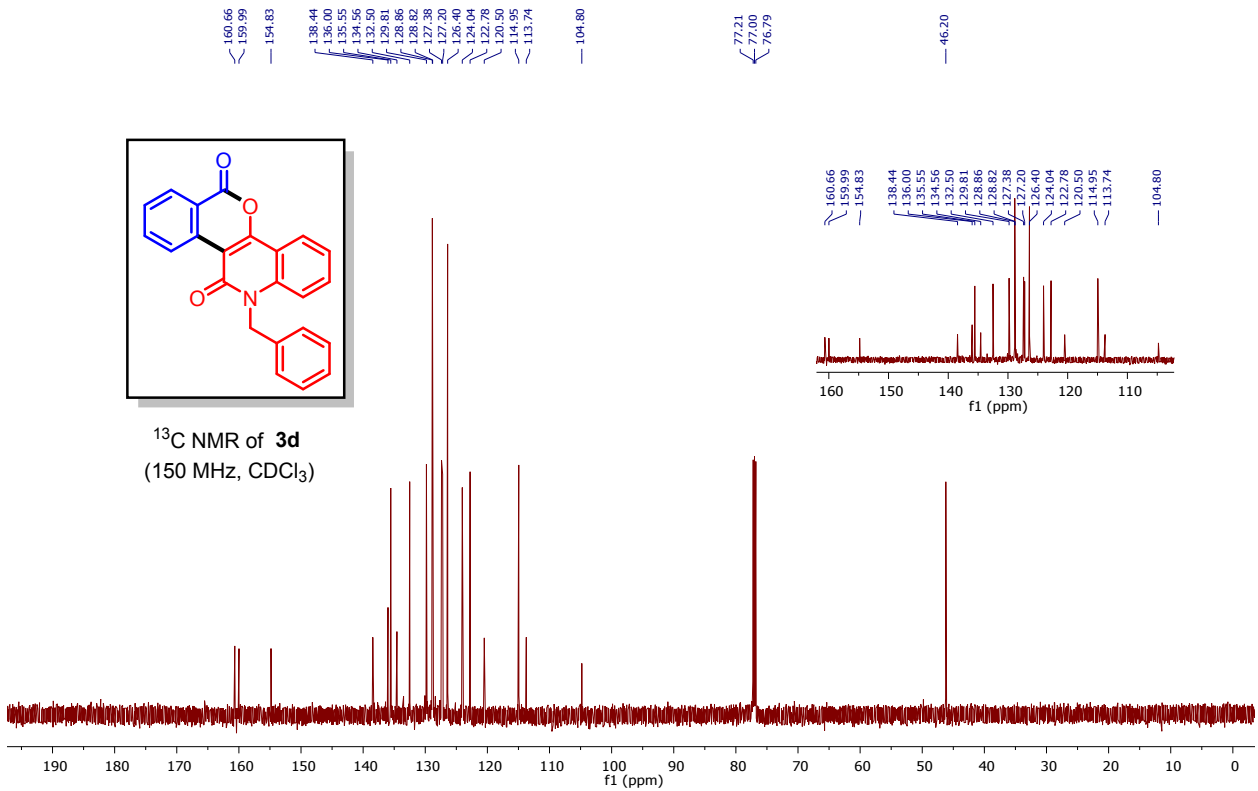



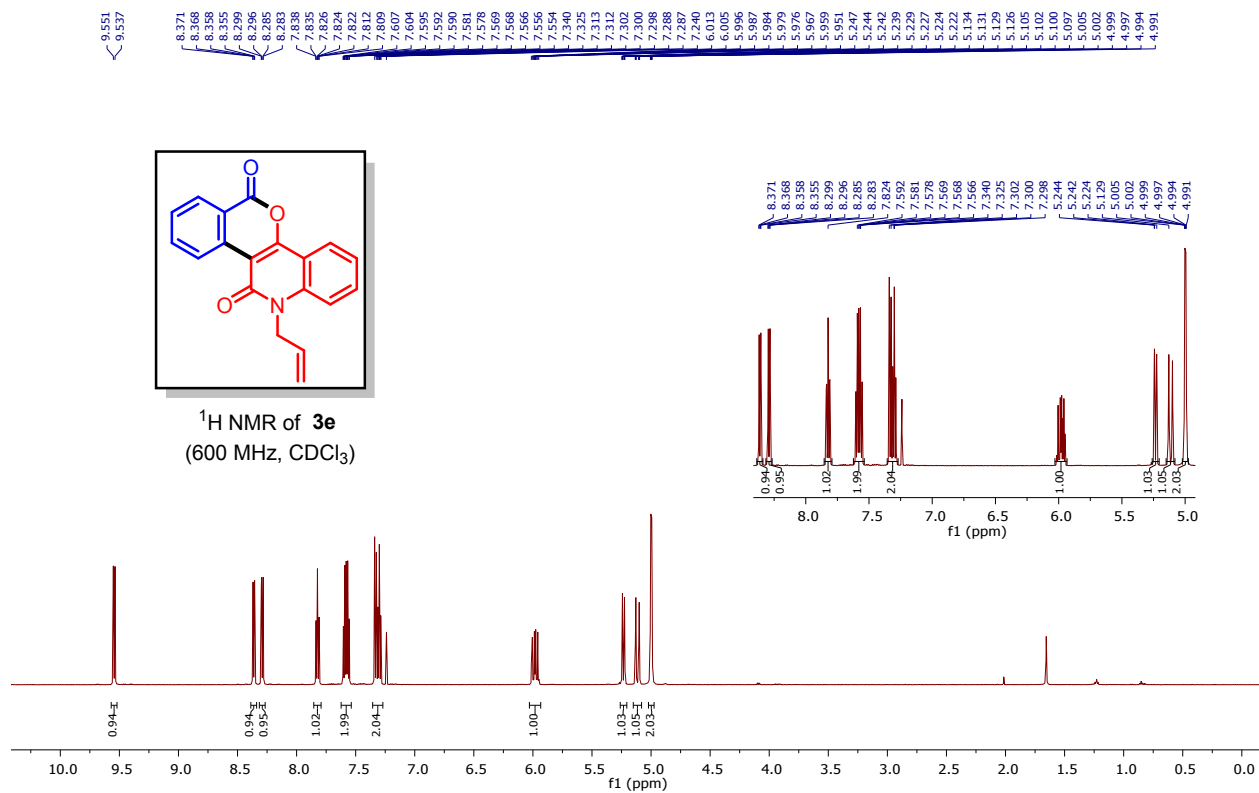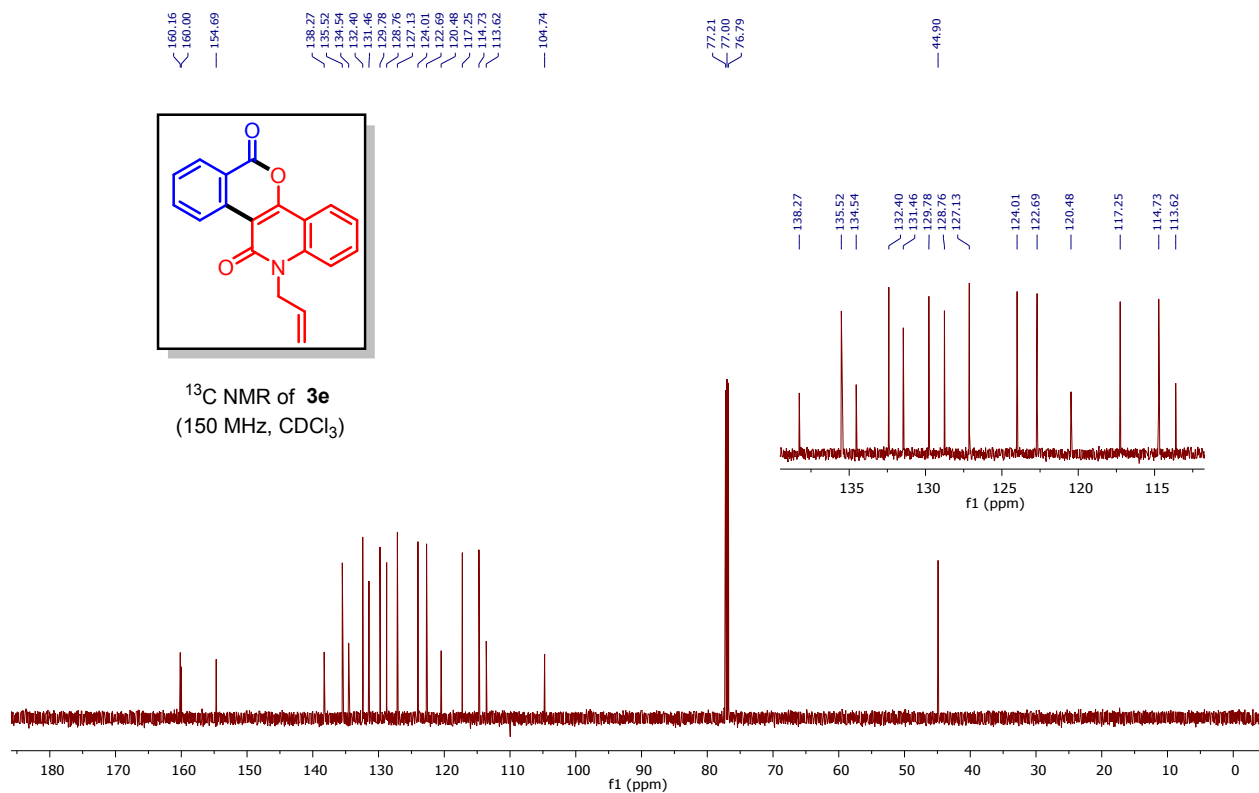



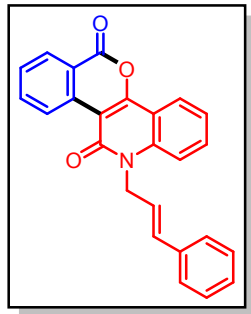

<sup>1</sup>H NMR of **3g**  
(600 MHz, CDCl<sub>3</sub>)

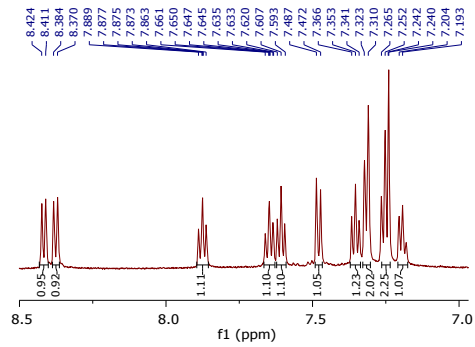

8.628  
8.614  
8.424  
8.411  
8.384  
8.370  
8.354  
8.341  
8.327  
8.310  
8.265  
8.252  
8.242  
8.240  
8.222  
8.214  
8.199  
8.180  
8.164  
8.152  
8.137  
8.120  
8.104  
8.087  
8.072  
8.056  
8.041  
8.024  
8.008  
7.992  
7.976  
7.960  
7.944  
7.928  
7.912  
7.896  
7.880  
7.864  
7.848  
7.832  
7.816  
7.800  
7.784  
7.768  
7.752  
7.736  
7.720  
7.704  
7.688  
7.672  
7.656  
7.640  
7.624  
7.608  
7.592  
7.576  
7.560  
7.544  
7.528  
7.512  
7.496  
7.480  
7.464  
7.448  
7.432  
7.416  
7.400  
7.384  
7.368  
7.352  
7.336  
7.320  
7.304  
7.288  
7.272  
7.256  
7.240  
7.224  
7.208  
7.192  
7.176  
7.160  
7.144  
7.128  
7.112  
7.096  
7.080  
7.064  
7.048  
7.032  
7.016  
7.000  
6.984  
6.968  
6.952  
6.936  
6.920  
6.904  
6.888  
6.872  
6.856  
6.840  
6.824  
6.808  
6.792  
6.776  
6.760  
6.744  
6.728  
6.712  
6.696  
6.680  
6.664  
6.648  
6.632  
6.616  
6.600  
6.584  
6.568  
6.552  
6.536  
6.520  
6.504  
6.488  
6.472  
6.456  
6.440  
6.424  
6.408  
6.392  
6.376  
6.360  
6.344  
6.328  
6.312  
6.296  
6.280  
6.264  
6.248  
6.232  
6.216  
6.200  
6.184  
6.168  
6.152  
6.136  
6.120  
6.104  
6.088  
6.072  
6.056  
6.040  
6.024  
6.008  
5.992  
5.976  
5.960  
5.944  
5.928  
5.912  
5.896  
5.880  
5.864  
5.848  
5.832  
5.816  
5.800  
5.784  
5.768  
5.752  
5.736  
5.720  
5.704  
5.688  
5.672  
5.656  
5.640  
5.624  
5.608  
5.592  
5.576  
5.560  
5.544  
5.528  
5.512  
5.496  
5.480  
5.464  
5.448  
5.432  
5.416  
5.400  
5.384  
5.368  
5.352  
5.336  
5.320  
5.304  
5.288  
5.272  
5.256  
5.240  
5.224  
5.208  
5.192  
5.176  
5.160  
5.144  
5.128  
5.112  
5.096  
5.080  
5.064  
5.048  
5.032  
5.016  
5.000  
4.984  
4.968  
4.952  
4.936  
4.920  
4.904  
4.888  
4.872  
4.856  
4.840  
4.824  
4.808  
4.792  
4.776  
4.760  
4.744  
4.728  
4.712  
4.696  
4.680  
4.664  
4.648  
4.632  
4.616  
4.600  
4.584  
4.568  
4.552  
4.536  
4.520  
4.504  
4.488  
4.472  
4.456  
4.440  
4.424  
4.408  
4.392  
4.376  
4.360  
4.344  
4.328  
4.312  
4.296  
4.280  
4.264  
4.248  
4.232  
4.216  
4.200  
4.184  
4.168  
4.152  
4.136  
4.120  
4.104  
4.088  
4.072  
4.056  
4.040  
4.024  
4.008  
3.992  
3.976  
3.960  
3.944  
3.928  
3.912  
3.896  
3.880  
3.864  
3.848  
3.832  
3.816  
3.800  
3.784  
3.768  
3.752  
3.736  
3.720  
3.704  
3.688  
3.672  
3.656  
3.640  
3.624  
3.608  
3.592  
3.576  
3.560  
3.544  
3.528  
3.512  
3.496  
3.480  
3.464  
3.448  
3.432  
3.416  
3.400  
3.384  
3.368  
3.352  
3.336  
3.320  
3.304  
3.288  
3.272  
3.256  
3.240  
3.224  
3.208  
3.192  
3.176  
3.160  
3.144  
3.128  
3.112  
3.096  
3.080  
3.064  
3.048  
3.032  
3.016  
3.000  
2.984  
2.968  
2.952  
2.936  
2.920  
2.904  
2.888  
2.872  
2.856  
2.840  
2.824  
2.808  
2.792  
2.776  
2.760  
2.744  
2.728  
2.712  
2.696  
2.680  
2.664  
2.648  
2.632  
2.616  
2.600  
2.584  
2.568  
2.552  
2.536  
2.520  
2.504  
2.488  
2.472  
2.456  
2.440  
2.424  
2.408  
2.392  
2.376  
2.360  
2.344  
2.328  
2.312  
2.296  
2.280  
2.264  
2.248  
2.232  
2.216  
2.200  
2.184  
2.168  
2.152  
2.136  
2.120  
2.104  
2.088  
2.072  
2.056  
2.040  
2.024  
2.008  
1.992  
1.976  
1.960  
1.944  
1.928  
1.912  
1.896  
1.880  
1.864  
1.848  
1.832  
1.816  
1.800  
1.784  
1.768  
1.752  
1.736  
1.720  
1.704  
1.688  
1.672  
1.656  
1.640  
1.624  
1.608  
1.592  
1.576  
1.560  
1.544  
1.528  
1.512  
1.496  
1.480  
1.464  
1.448  
1.432  
1.416  
1.400  
1.384  
1.368  
1.352  
1.336  
1.320  
1.304  
1.288  
1.272  
1.256  
1.240  
1.224  
1.208  
1.192  
1.176  
1.160  
1.144  
1.128  
1.112  
1.096  
1.080  
1.064  
1.048  
1.032  
1.016  
1.000  
0.984  
0.968  
0.952  
0.936  
0.920  
0.904  
0.888  
0.872  
0.856  
0.840  
0.824  
0.808  
0.792  
0.776  
0.760  
0.744  
0.728  
0.712  
0.696  
0.680  
0.664  
0.648  
0.632  
0.616  
0.600  
0.584  
0.568  
0.552  
0.536  
0.520  
0.504  
0.488  
0.472  
0.456  
0.440  
0.424  
0.408  
0.392  
0.376  
0.360  
0.344  
0.328  
0.312  
0.296  
0.280  
0.264  
0.248  
0.232  
0.216  
0.200  
0.184  
0.168  
0.152  
0.136  
0.120  
0.104  
0.088  
0.072  
0.056  
0.040  
0.024  
0.008  
0.000

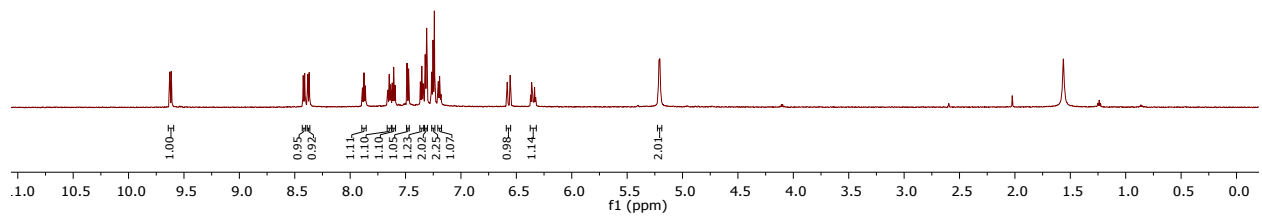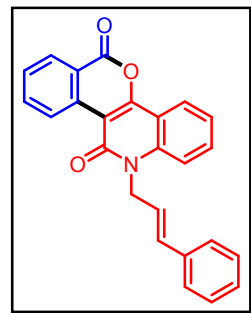

<sup>13</sup>C NMR of **3g**  
(150 MHz, CDCl<sub>3</sub>)

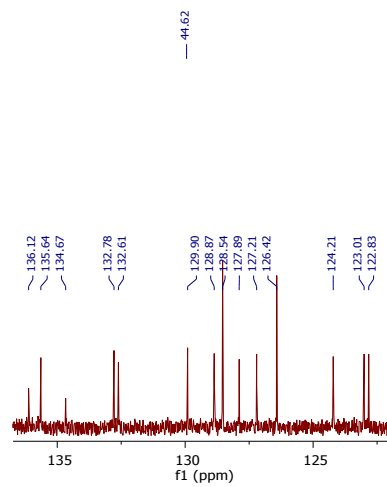

160.99  
160.15  
154.86  
138.41  
136.12  
135.64  
134.67  
132.76  
132.76  
129.90  
128.87  
128.54  
127.89  
127.21  
126.42  
124.21  
123.01  
122.82  
120.59  
114.74  
113.83  
104.94  
77.21  
77.00  
76.79  
44.62

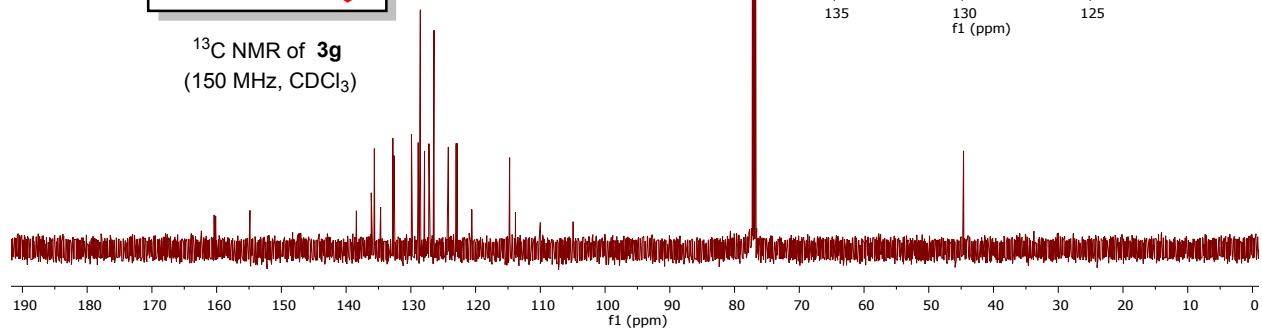

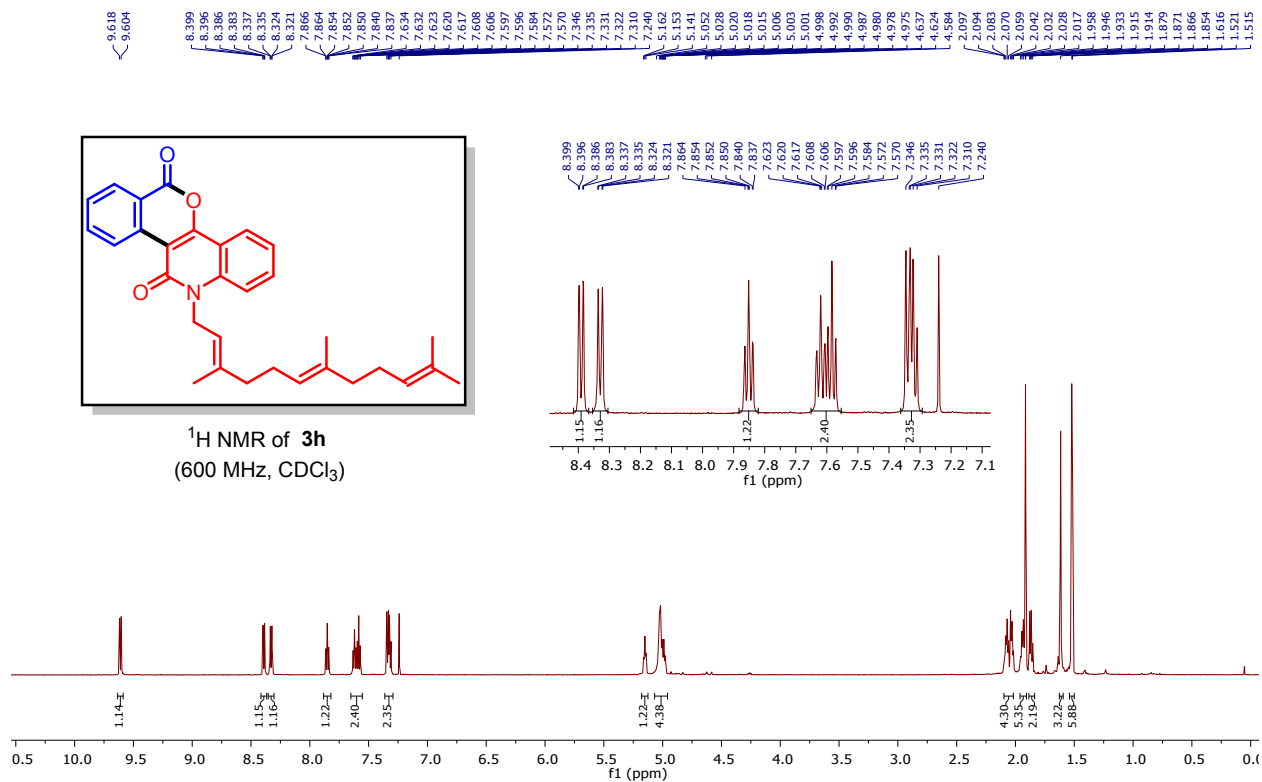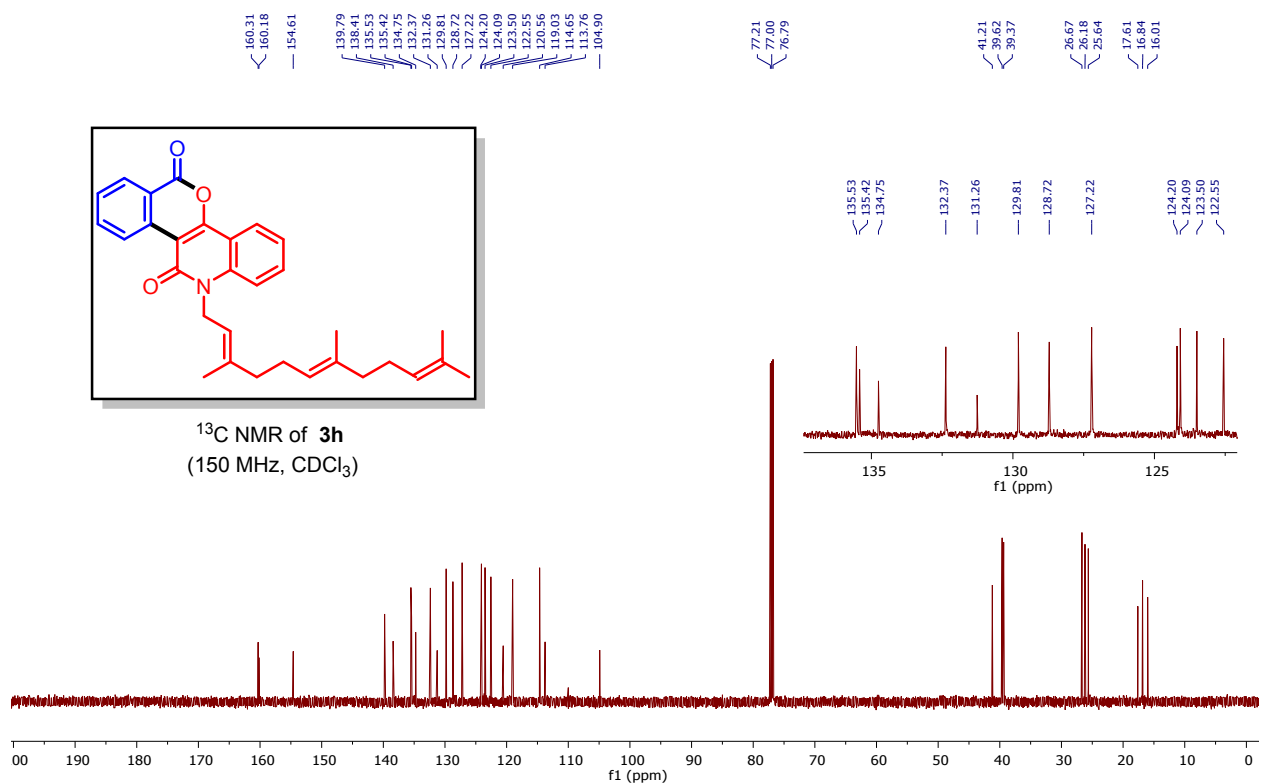

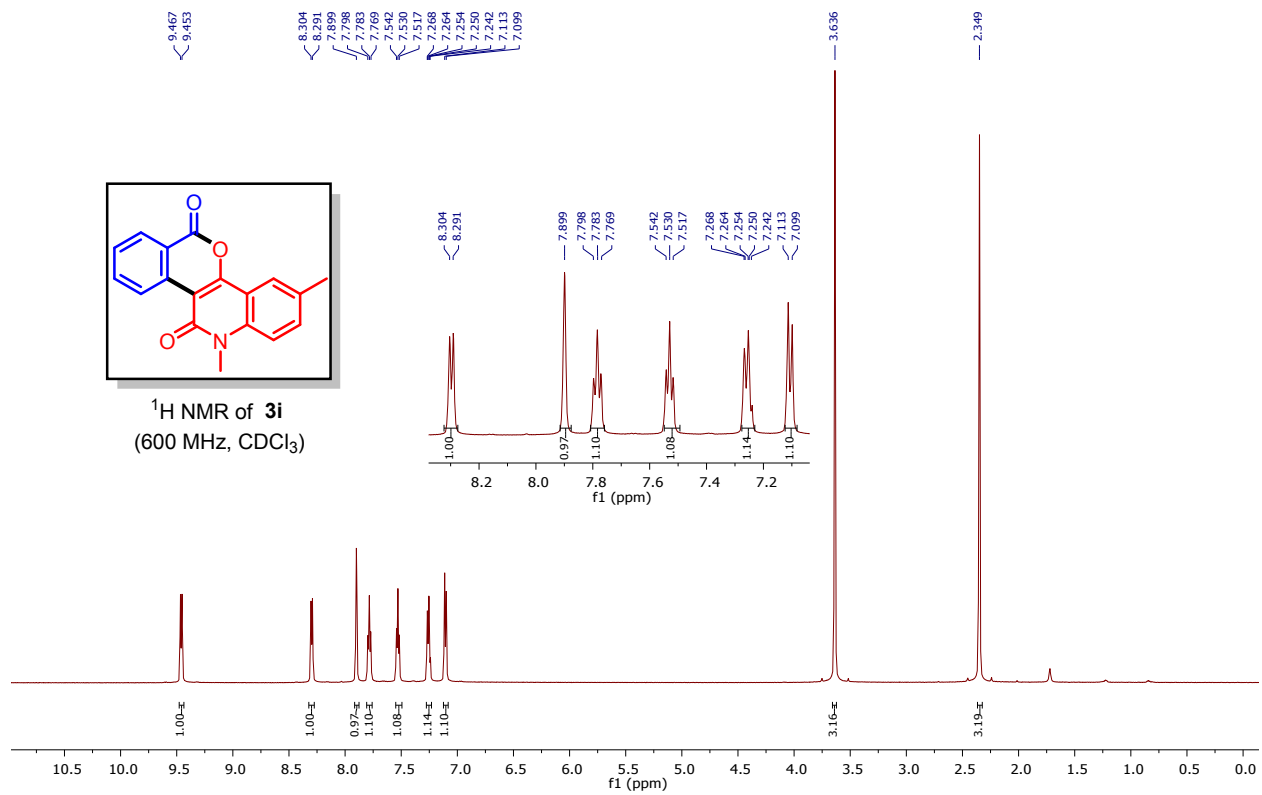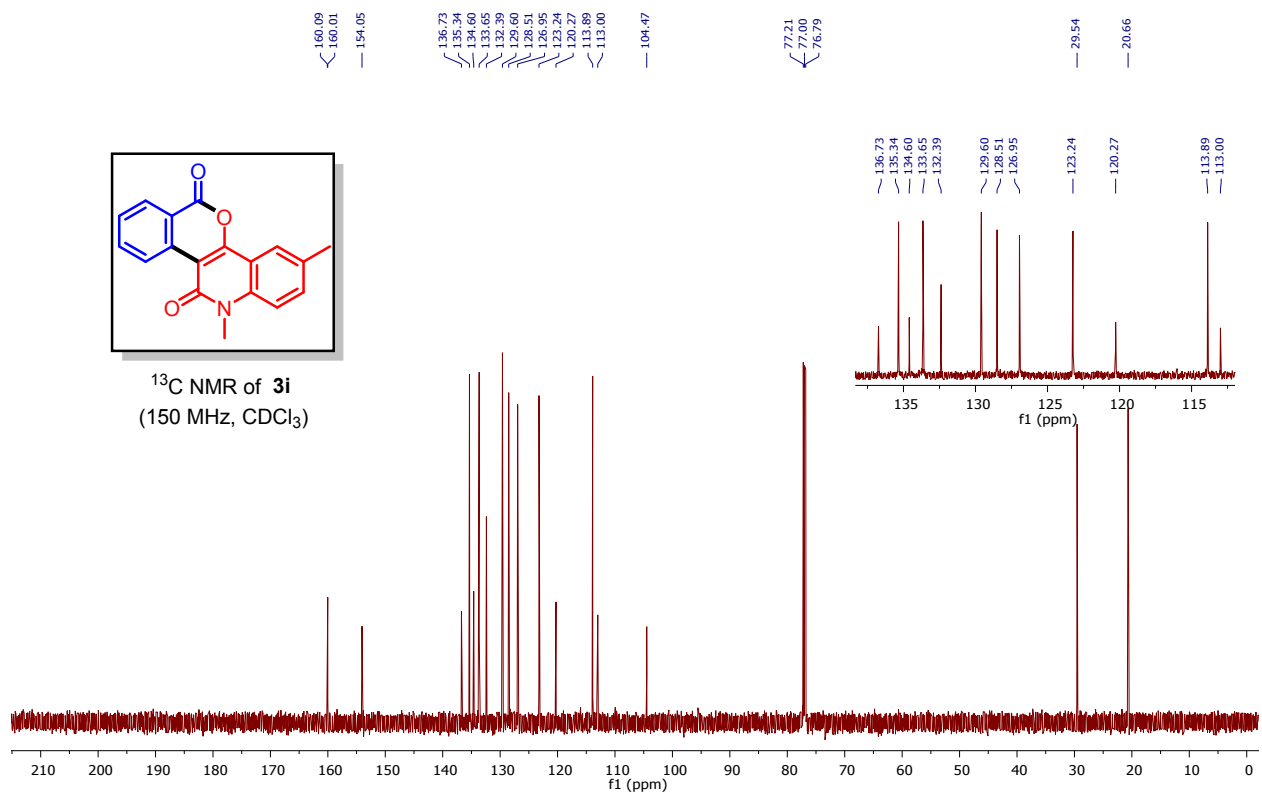

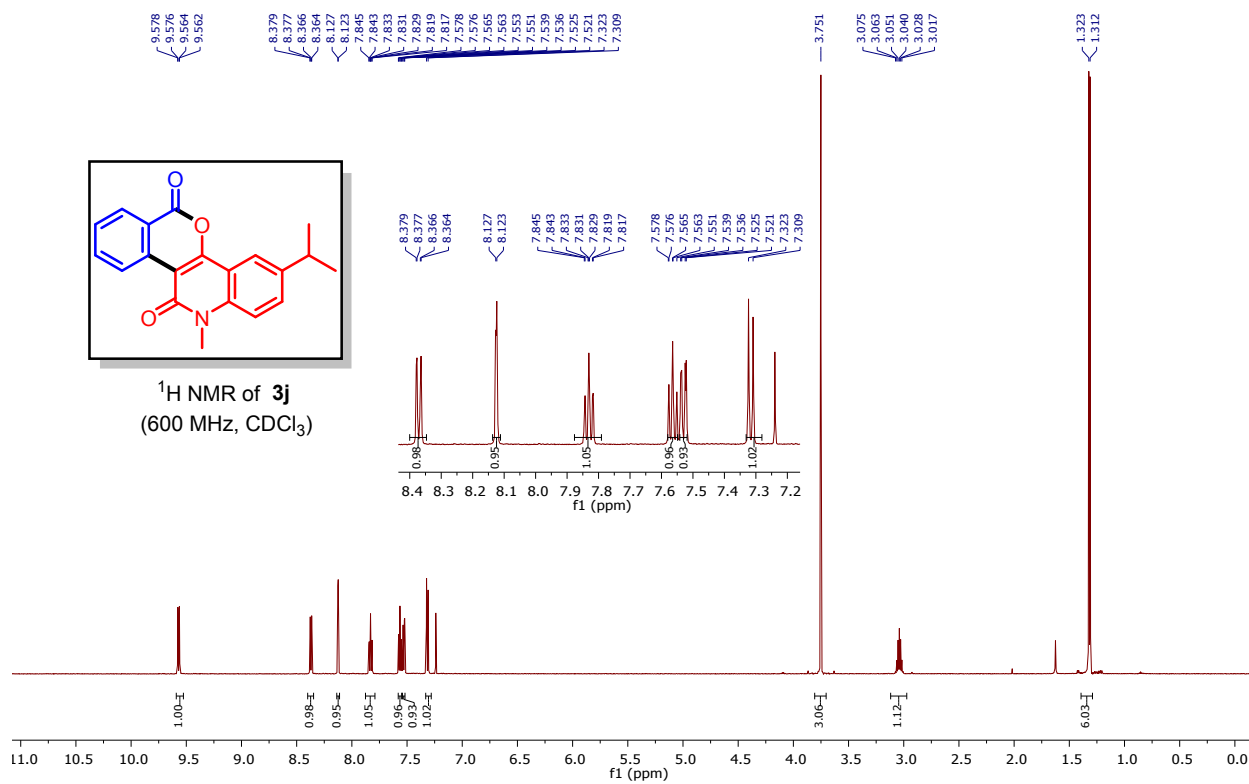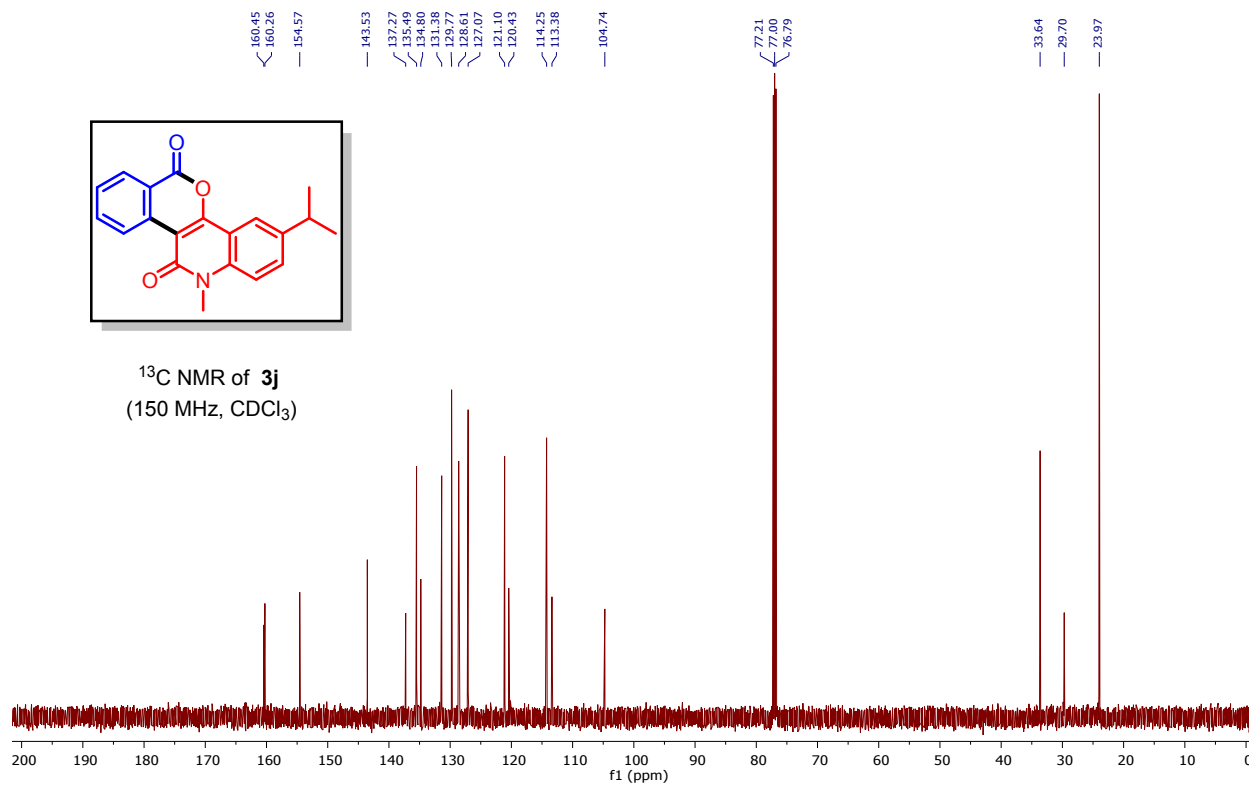

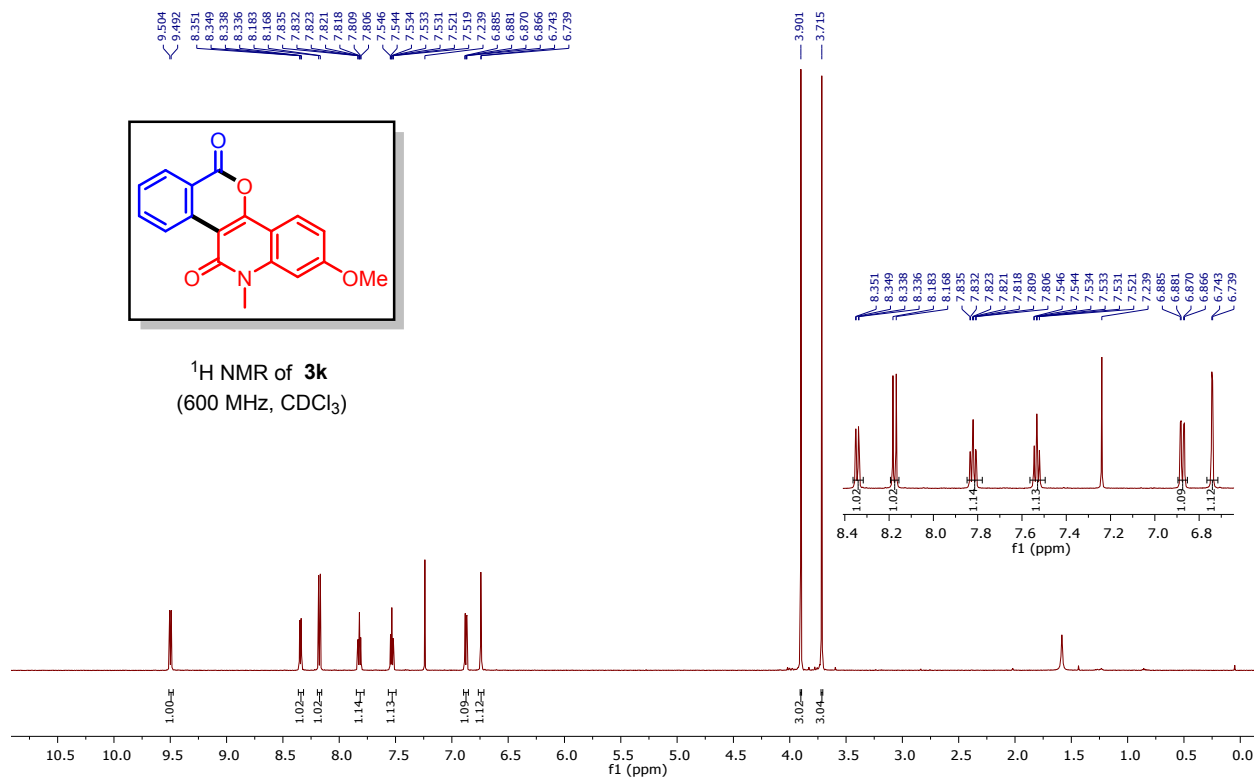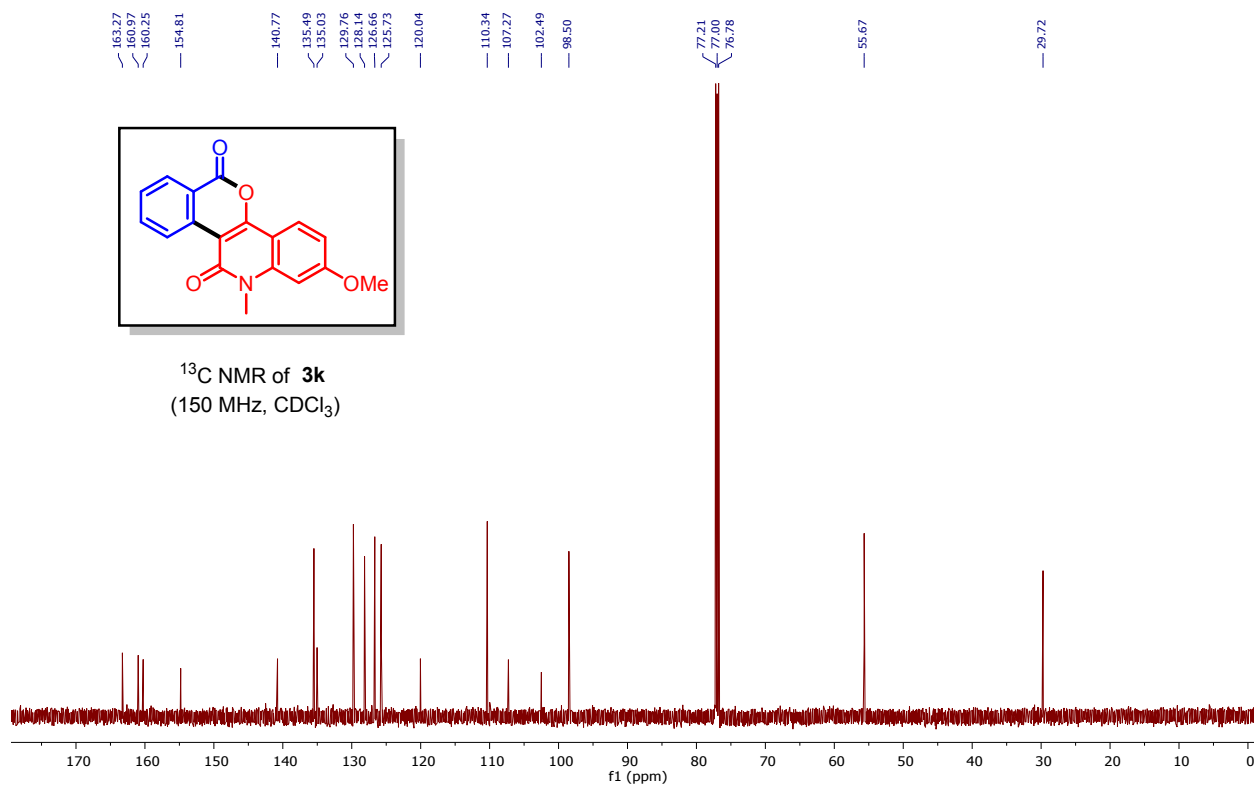

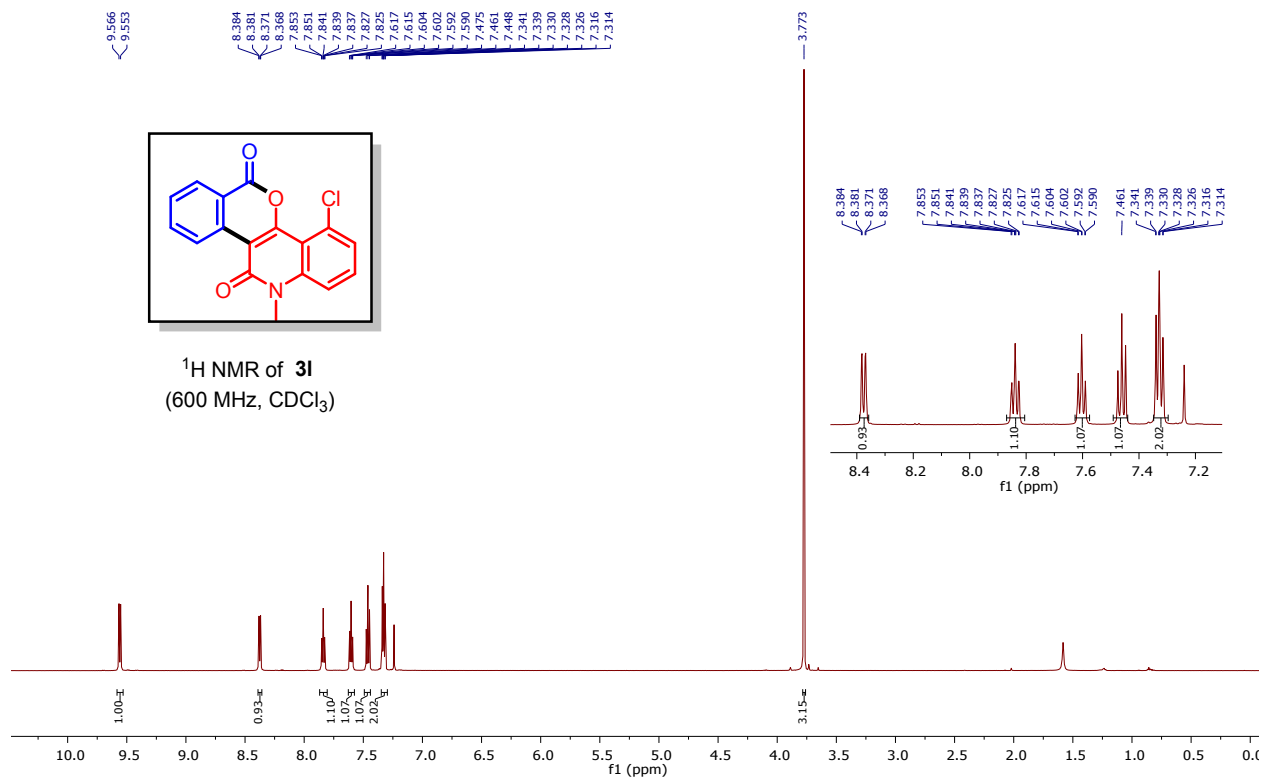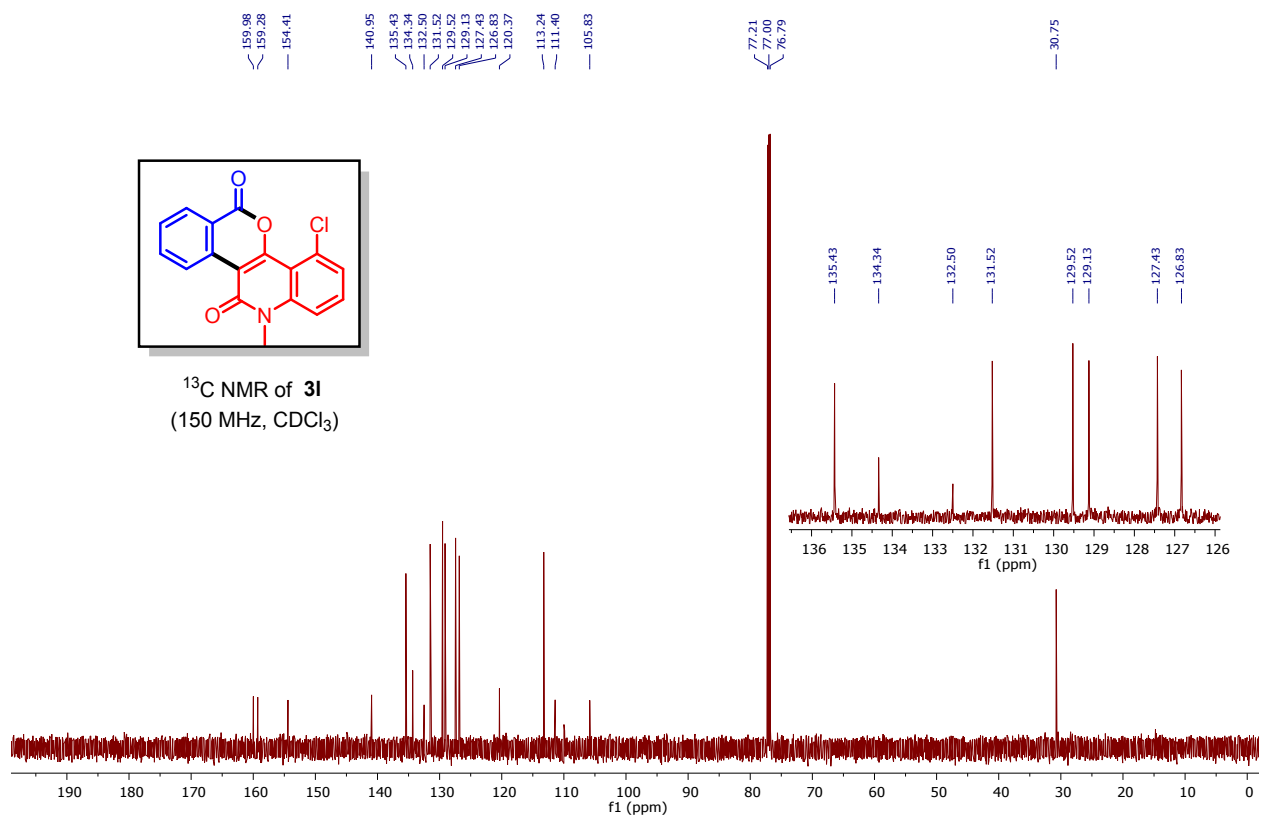



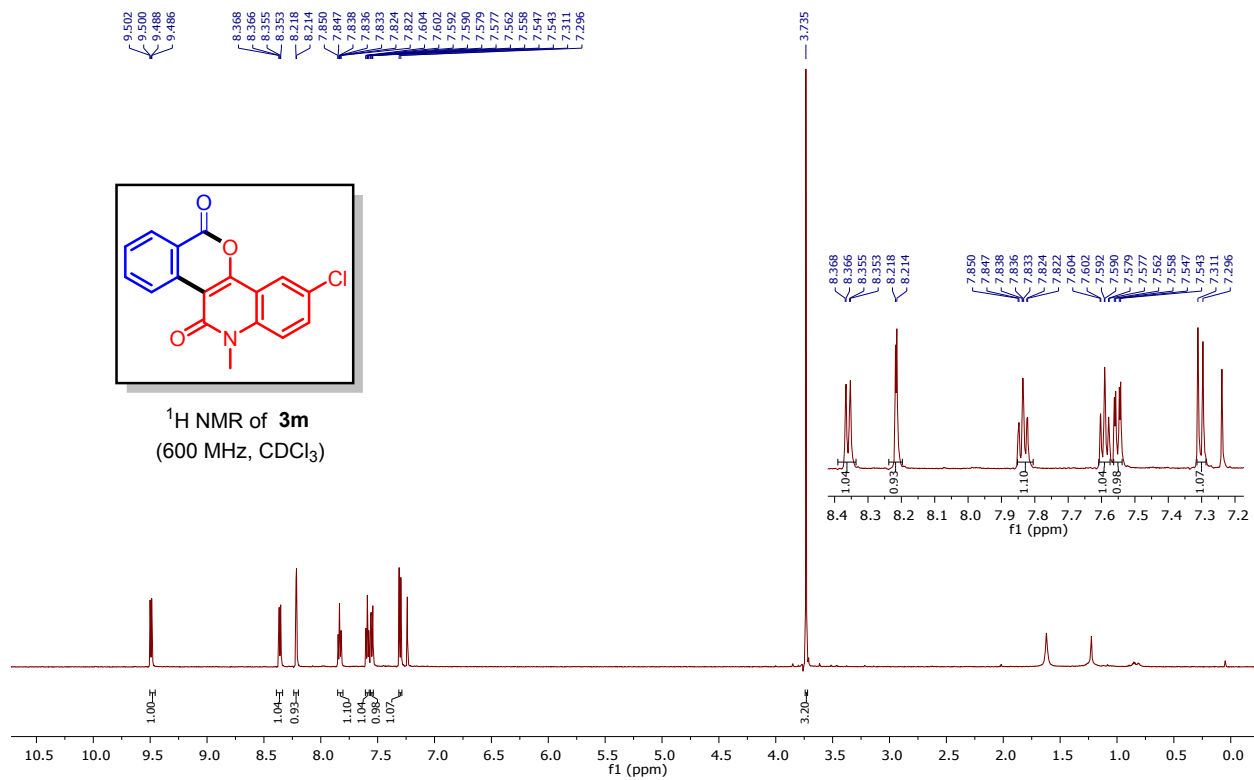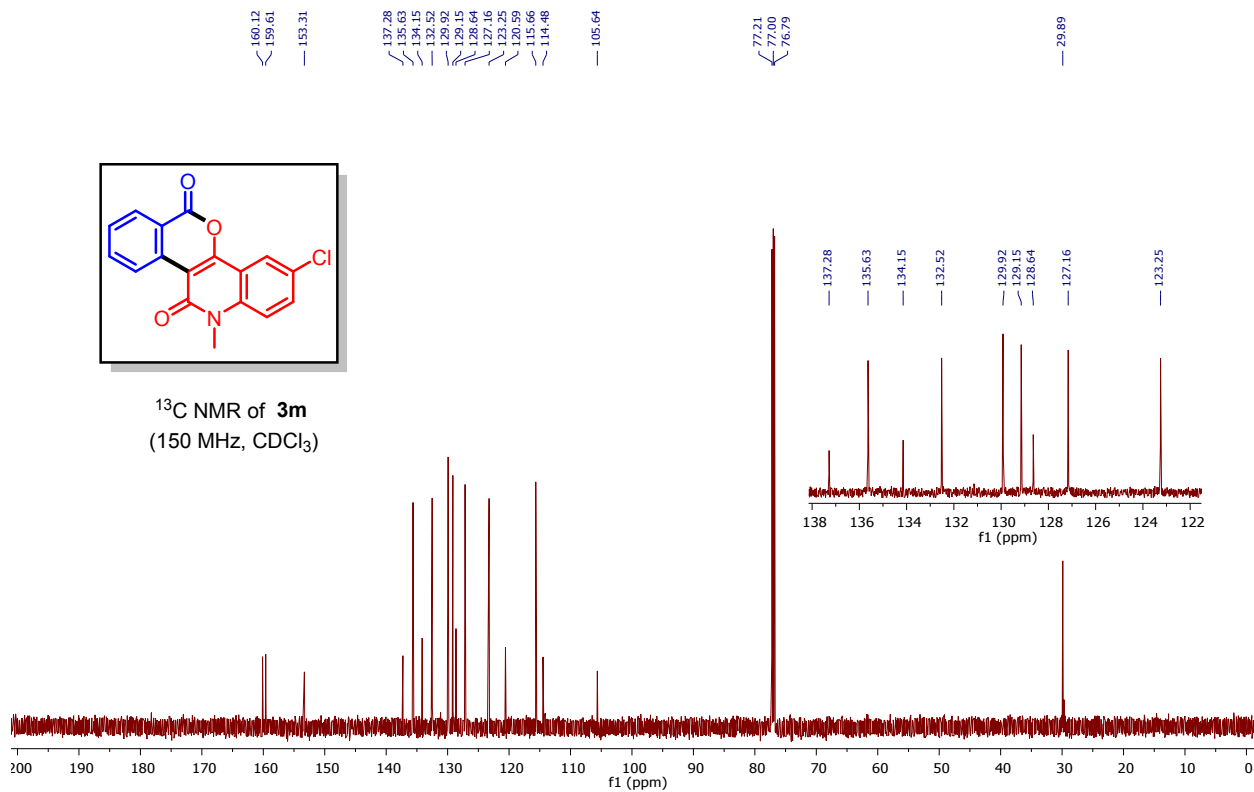

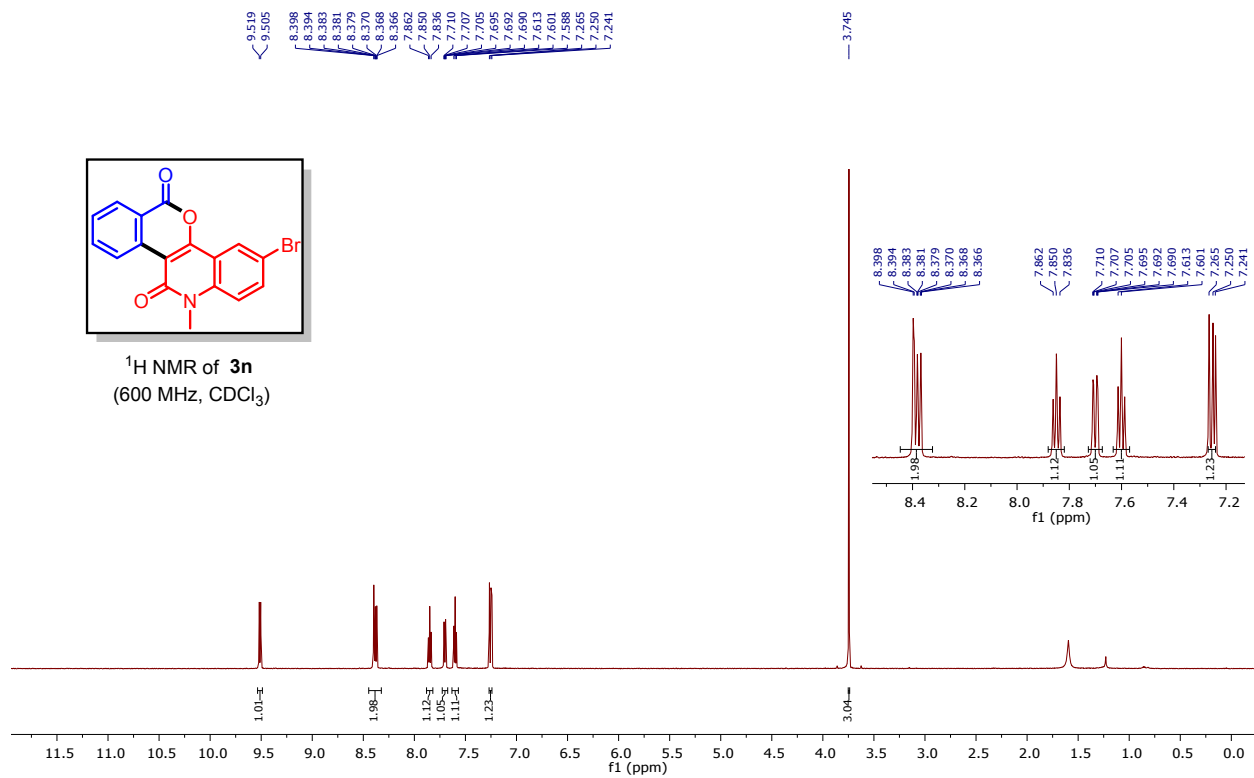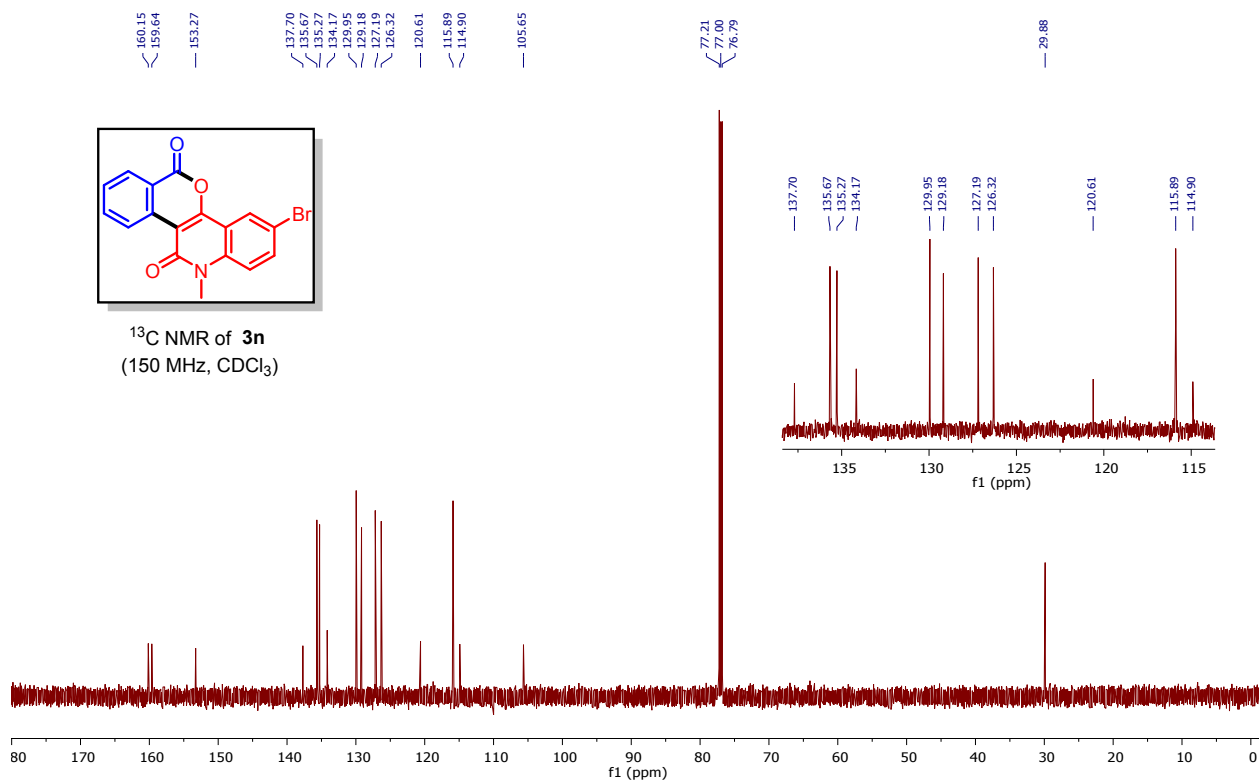

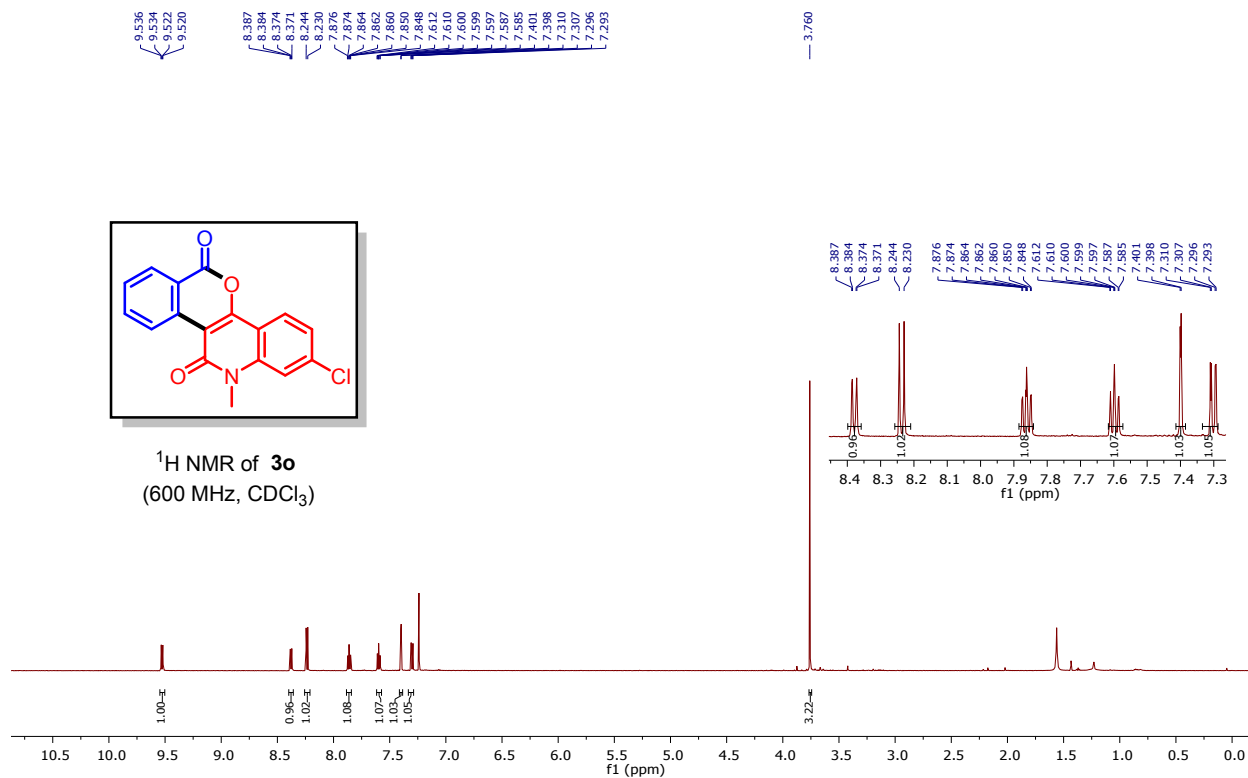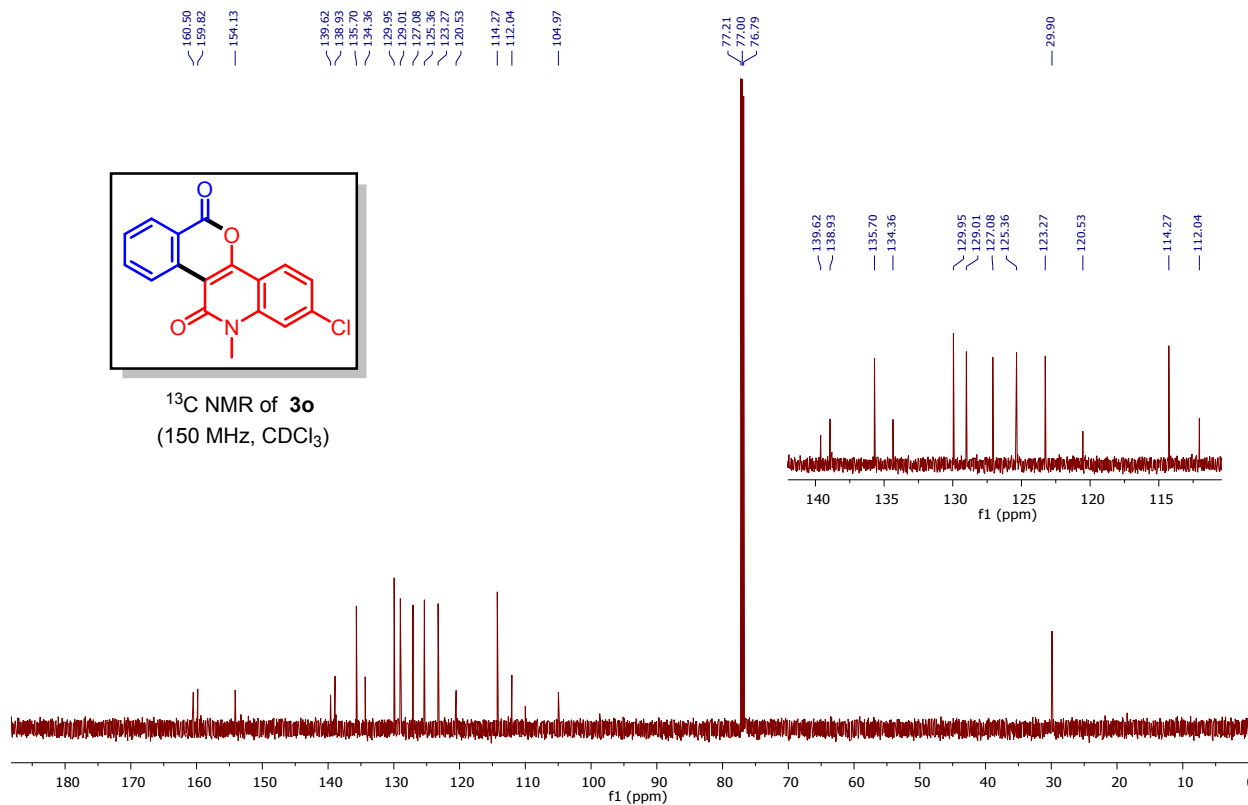

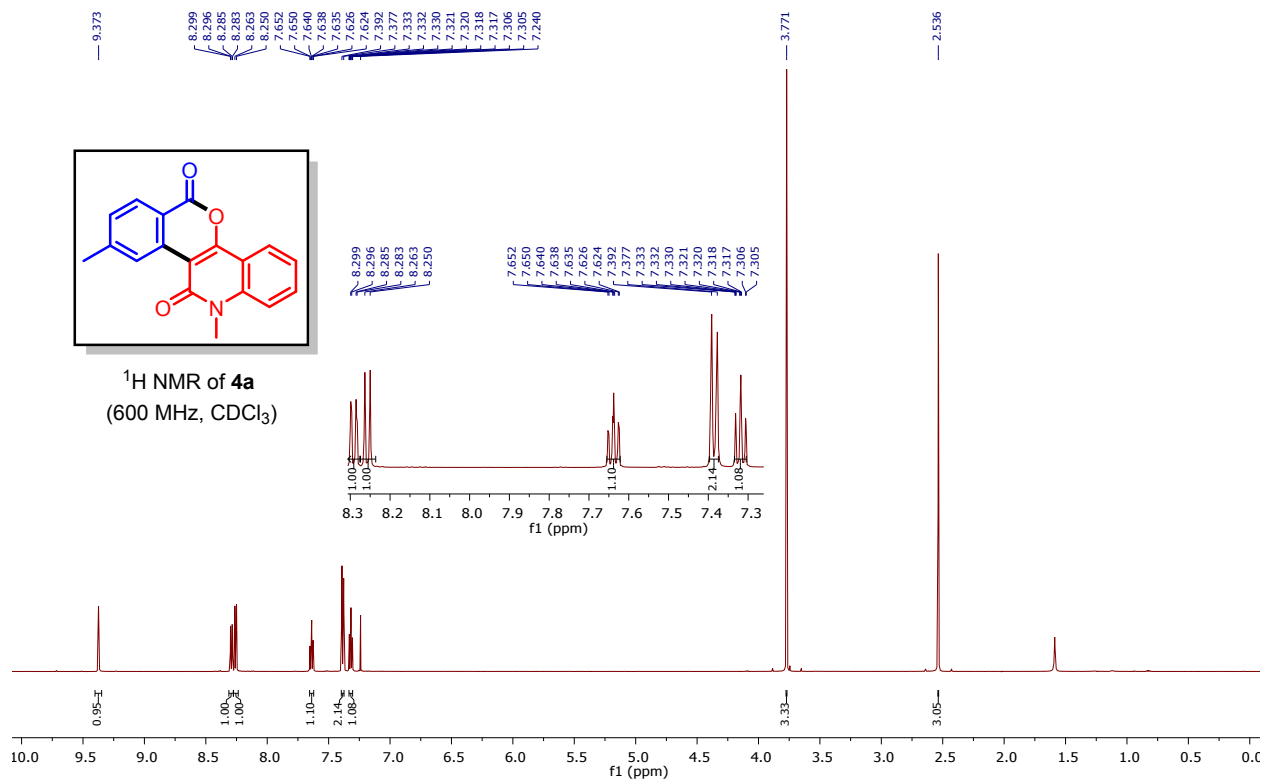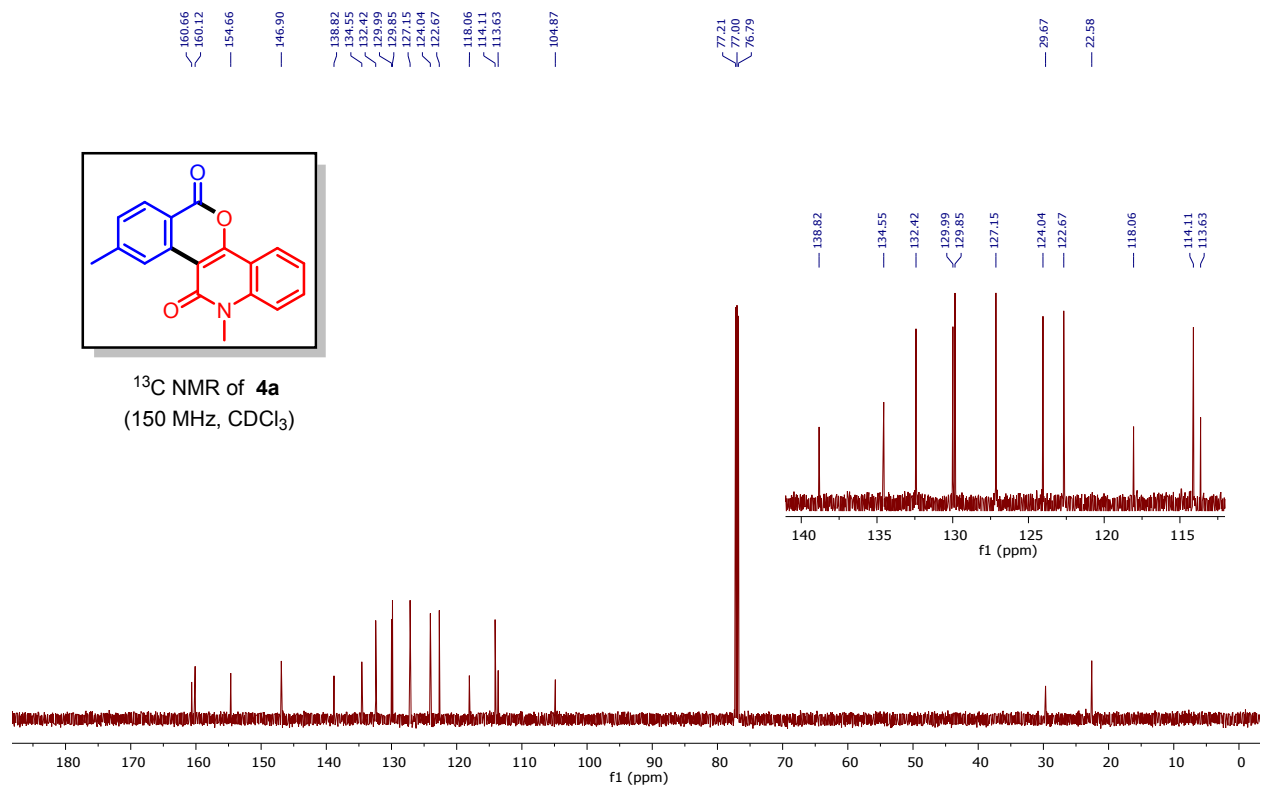

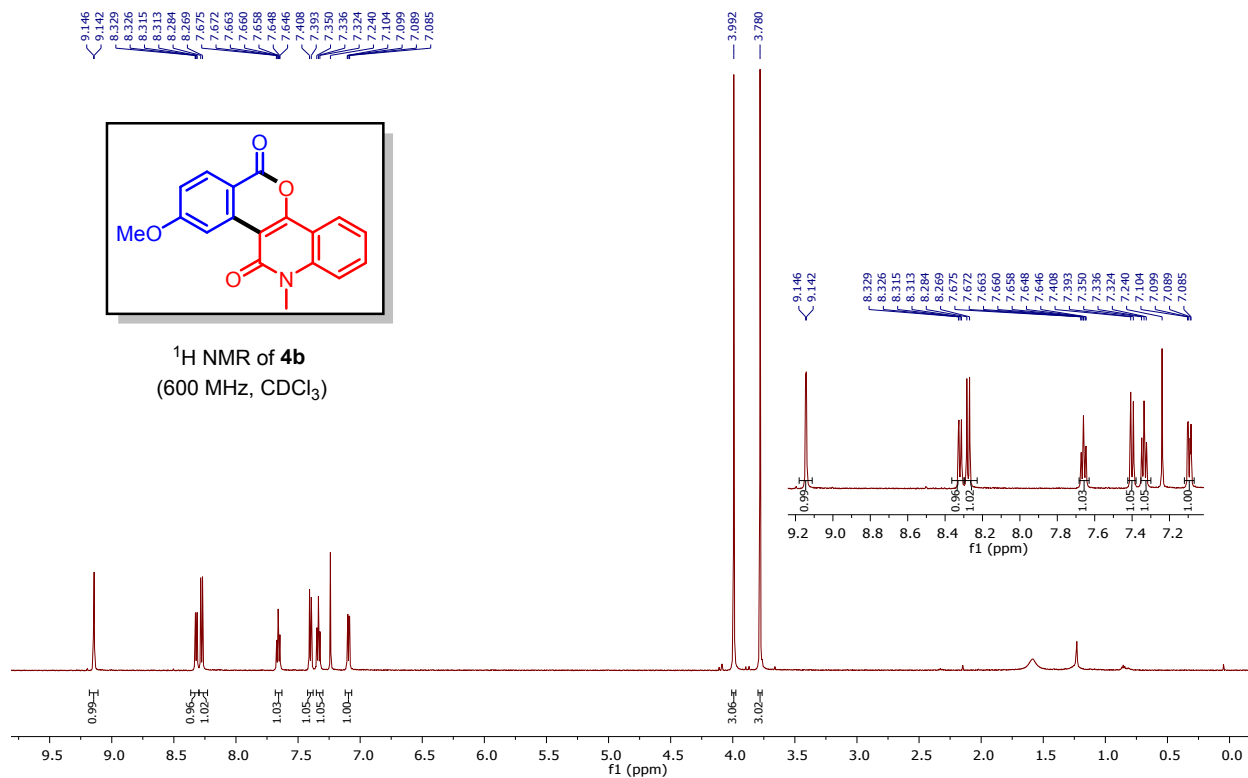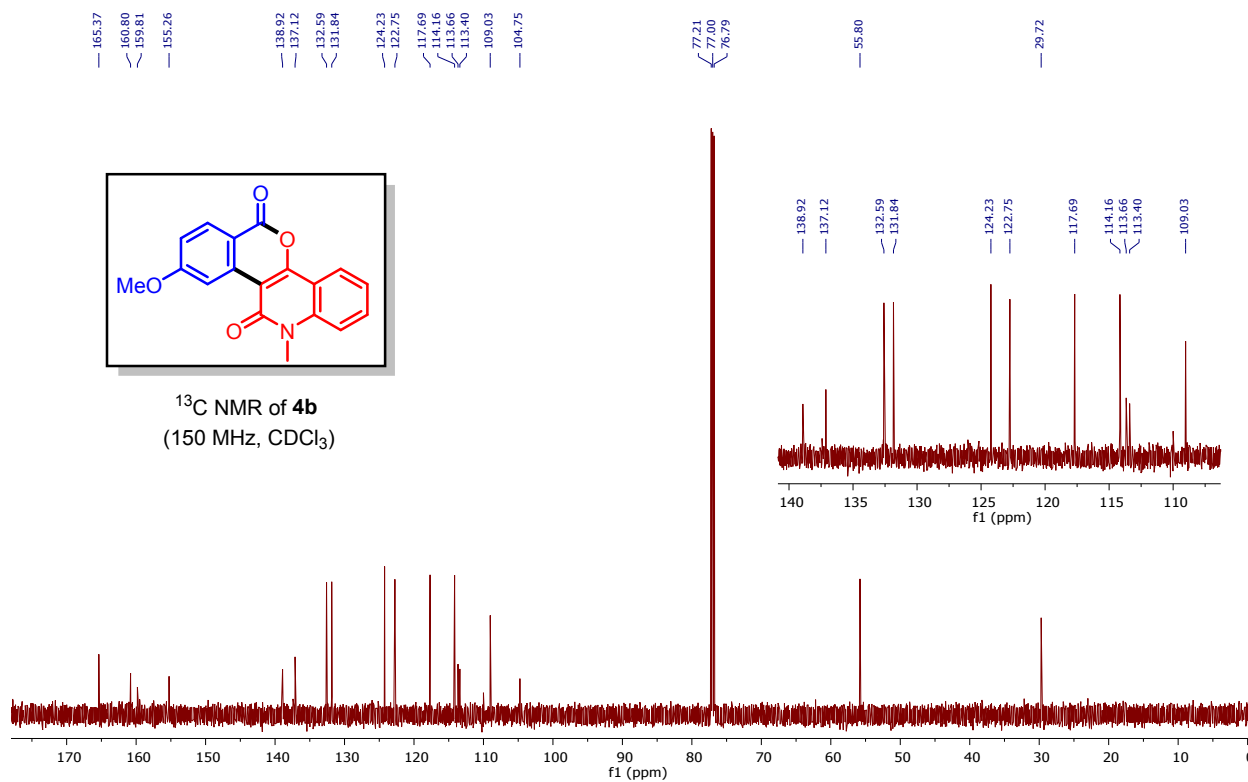

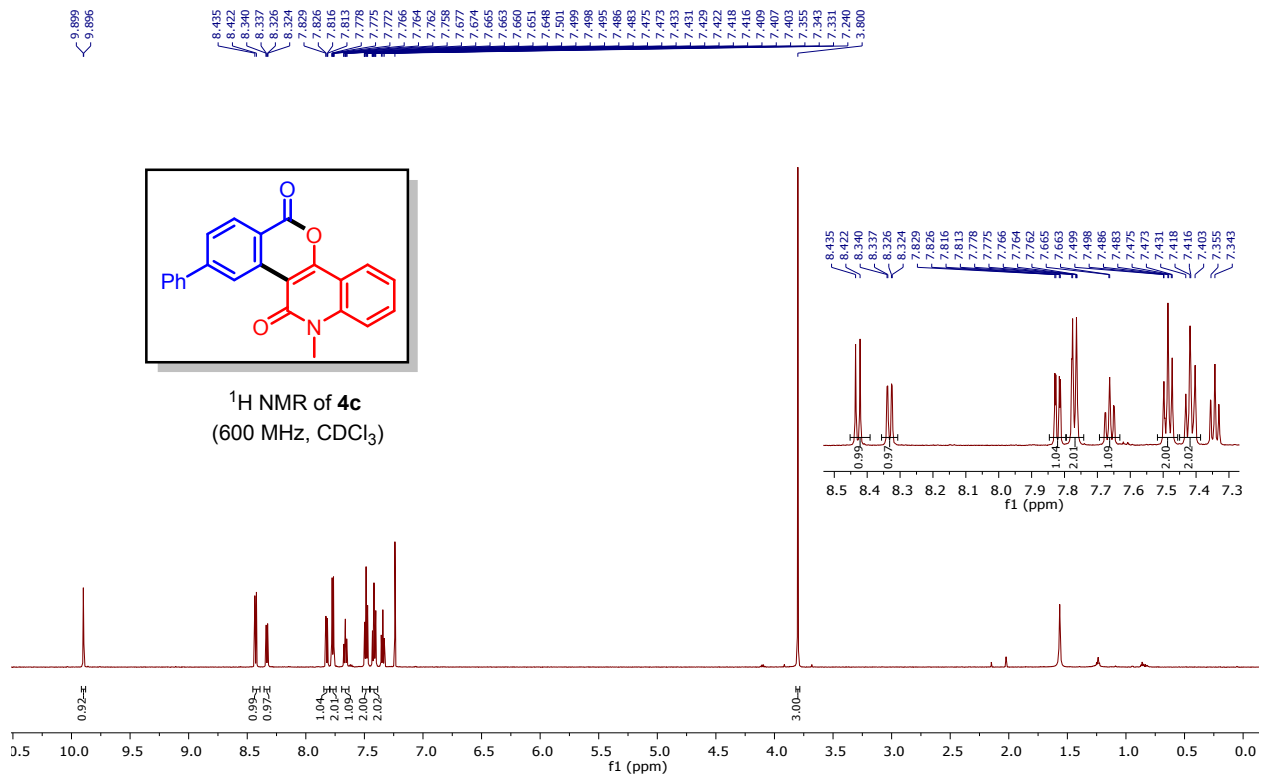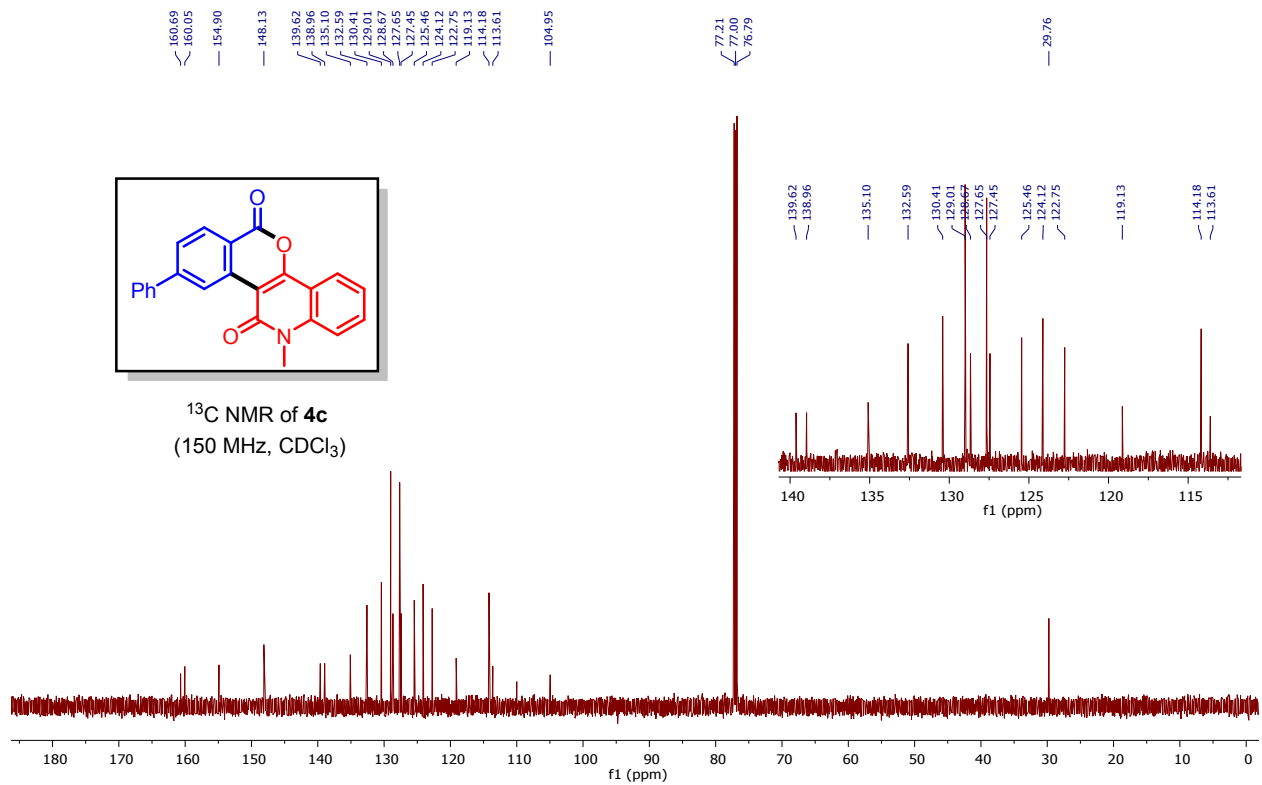

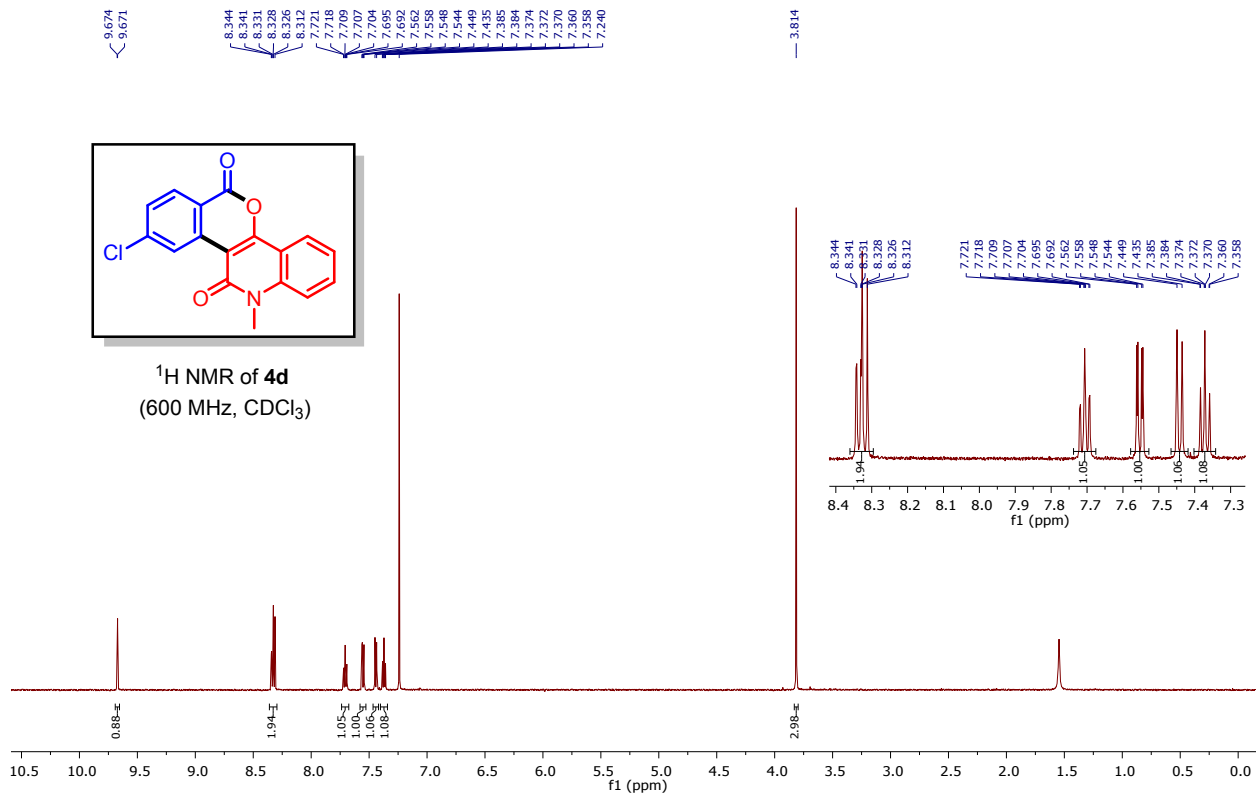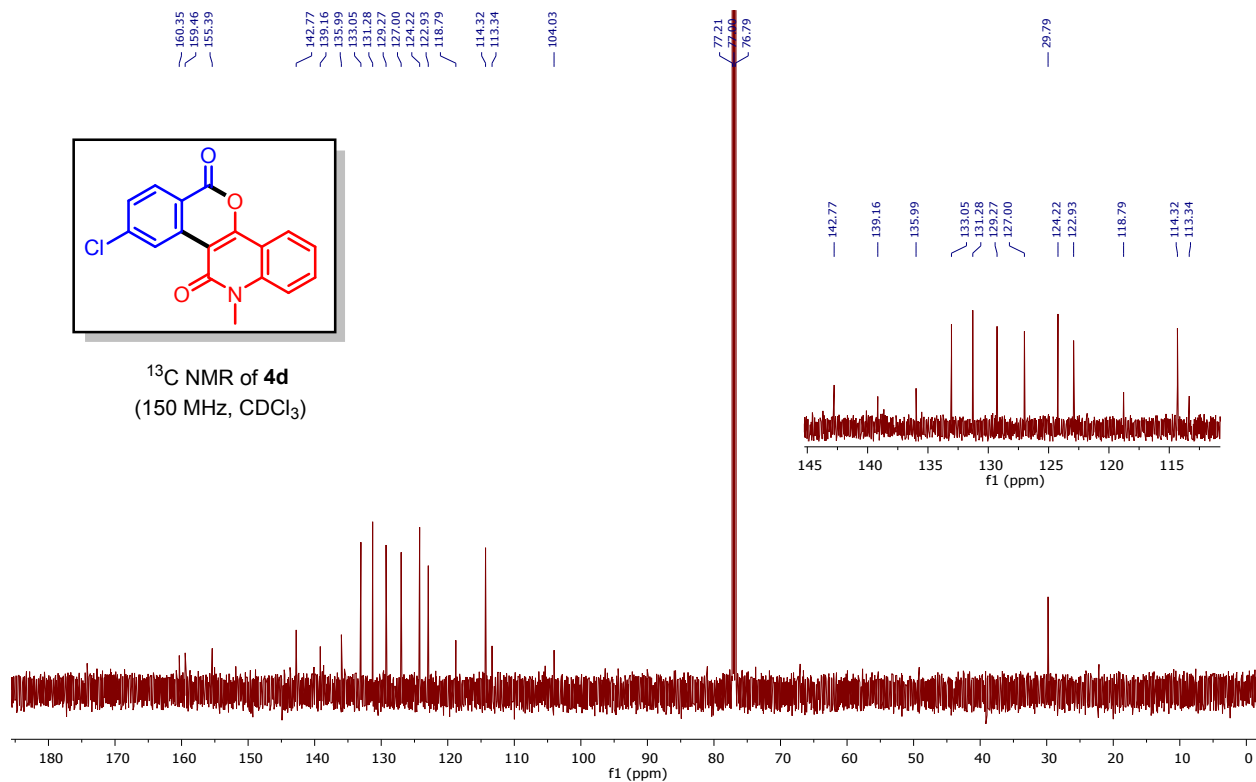

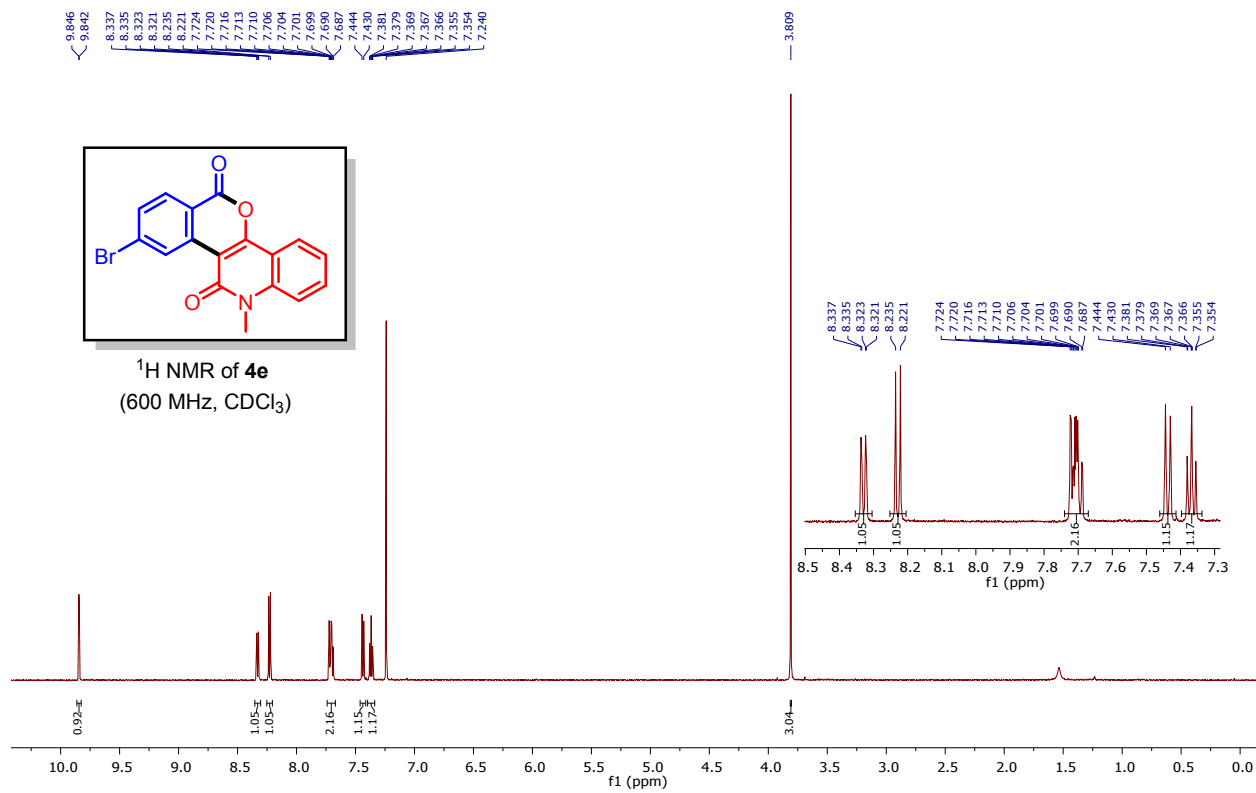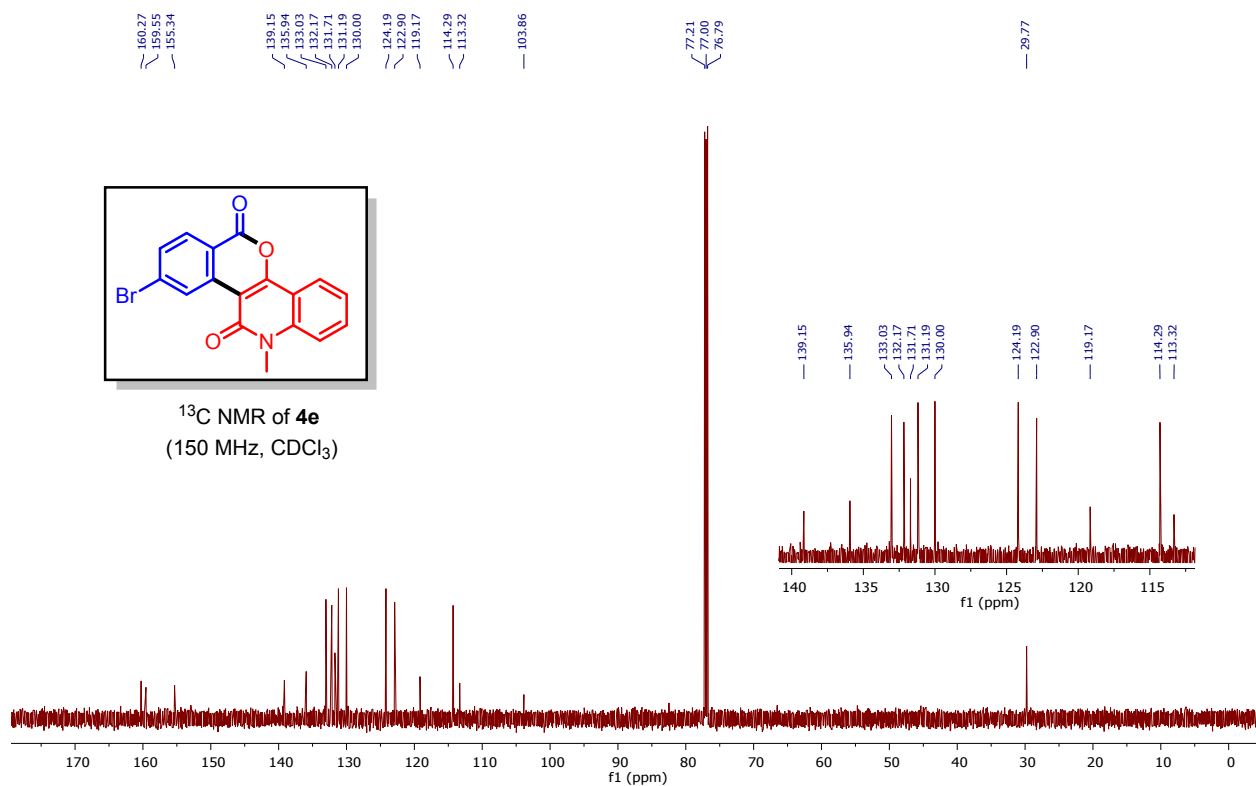



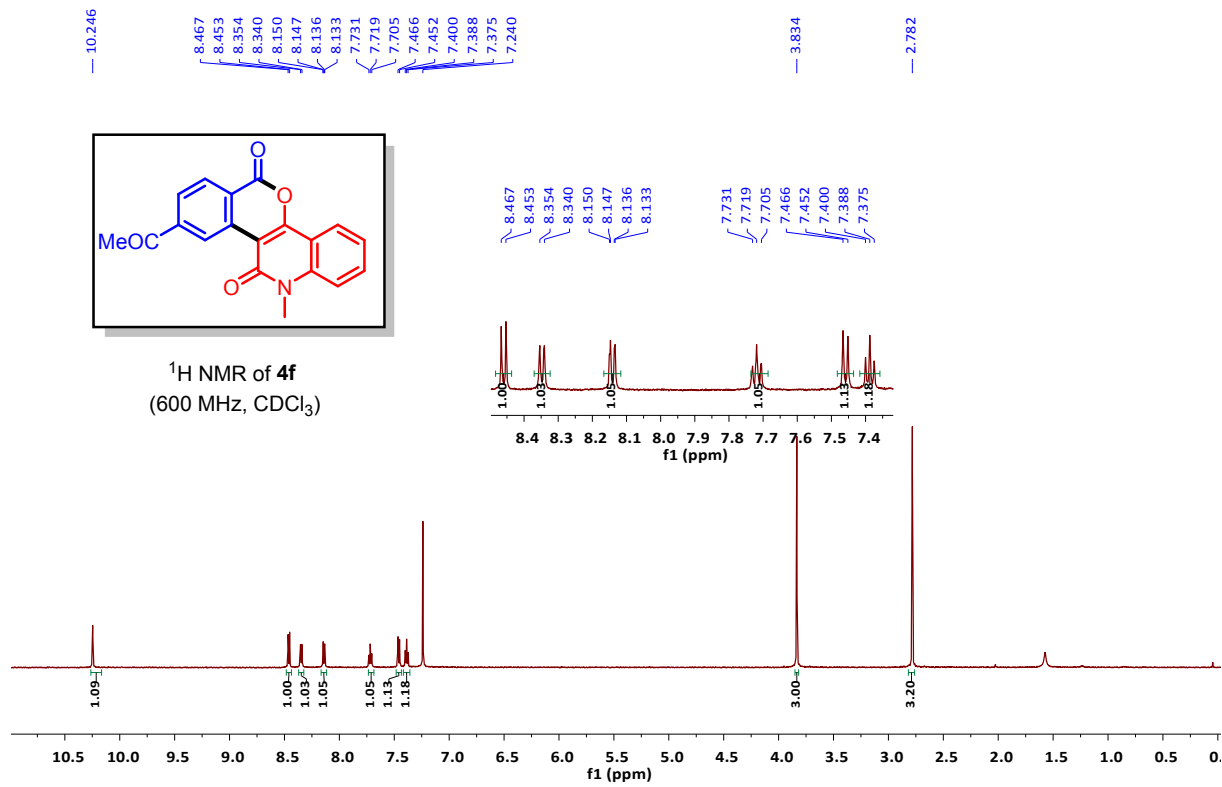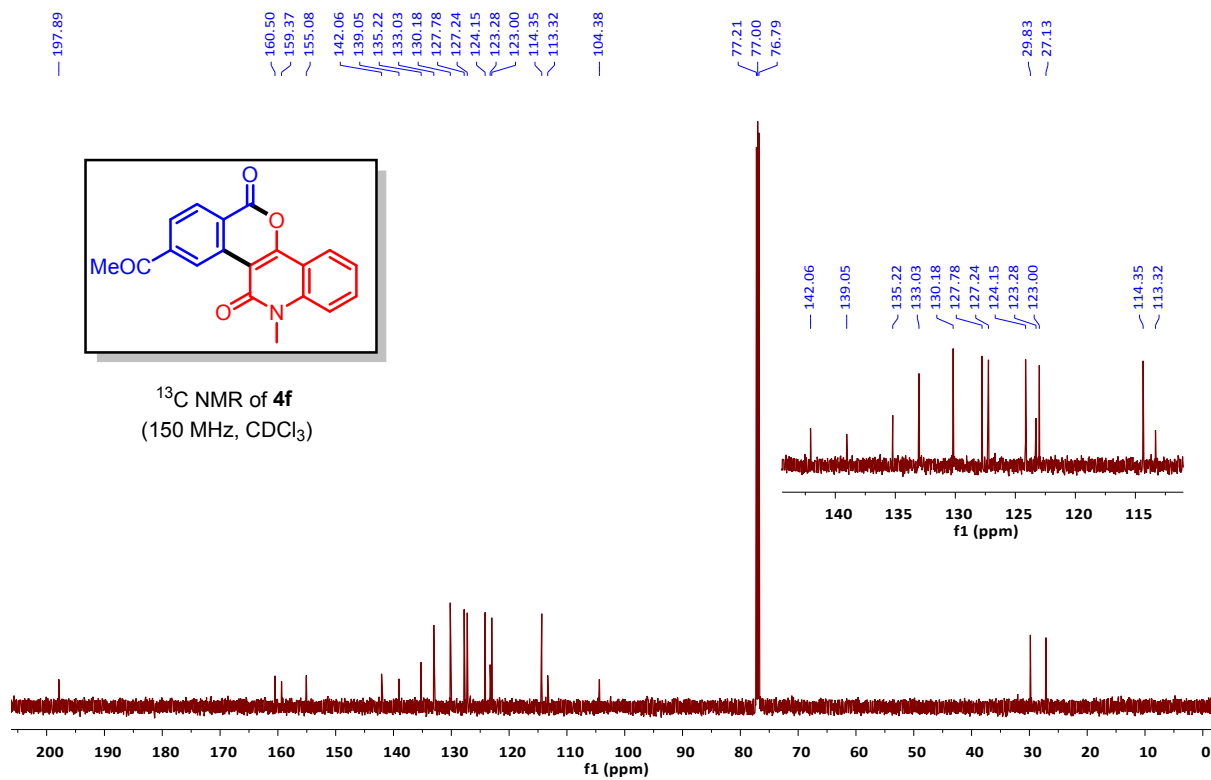

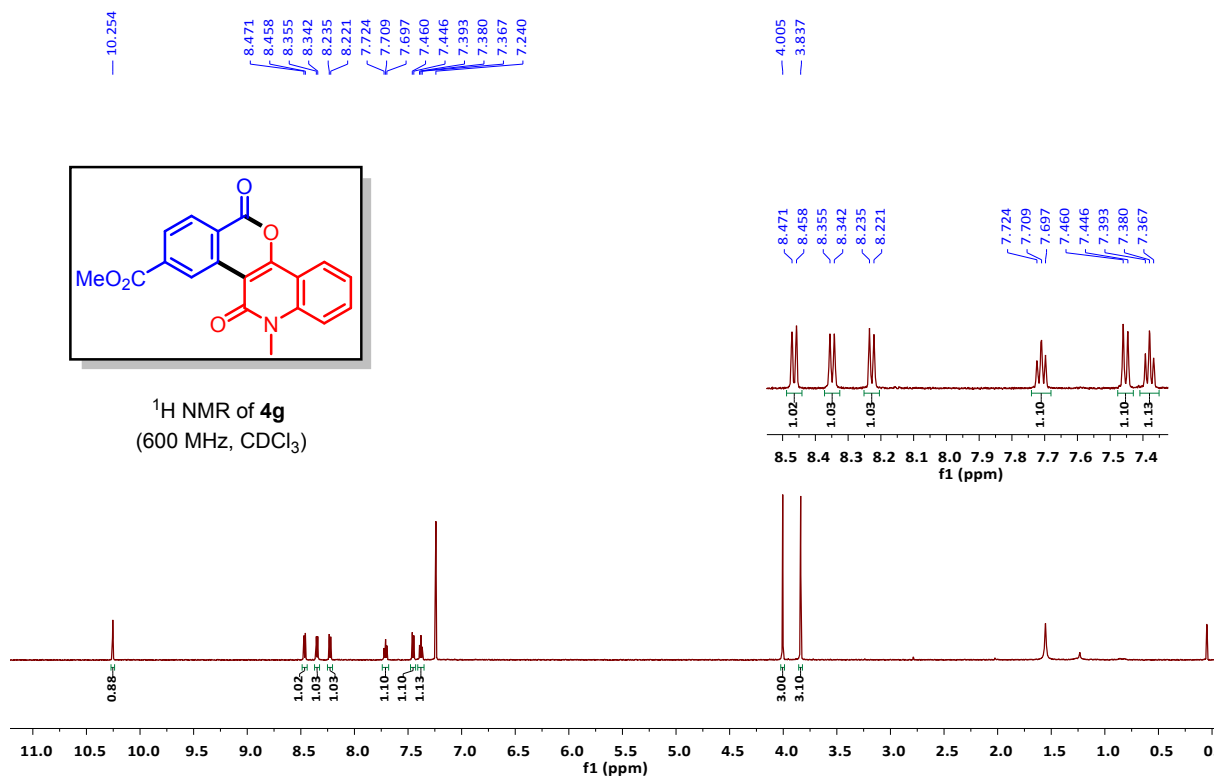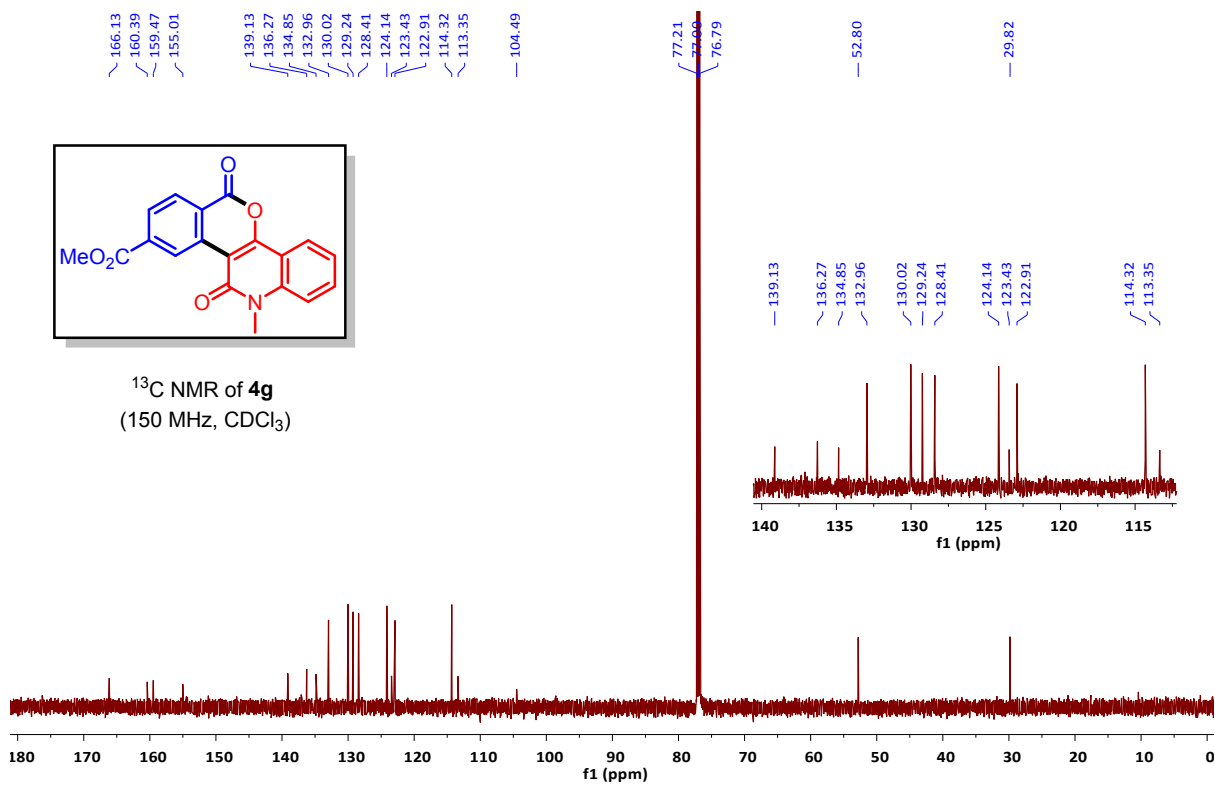

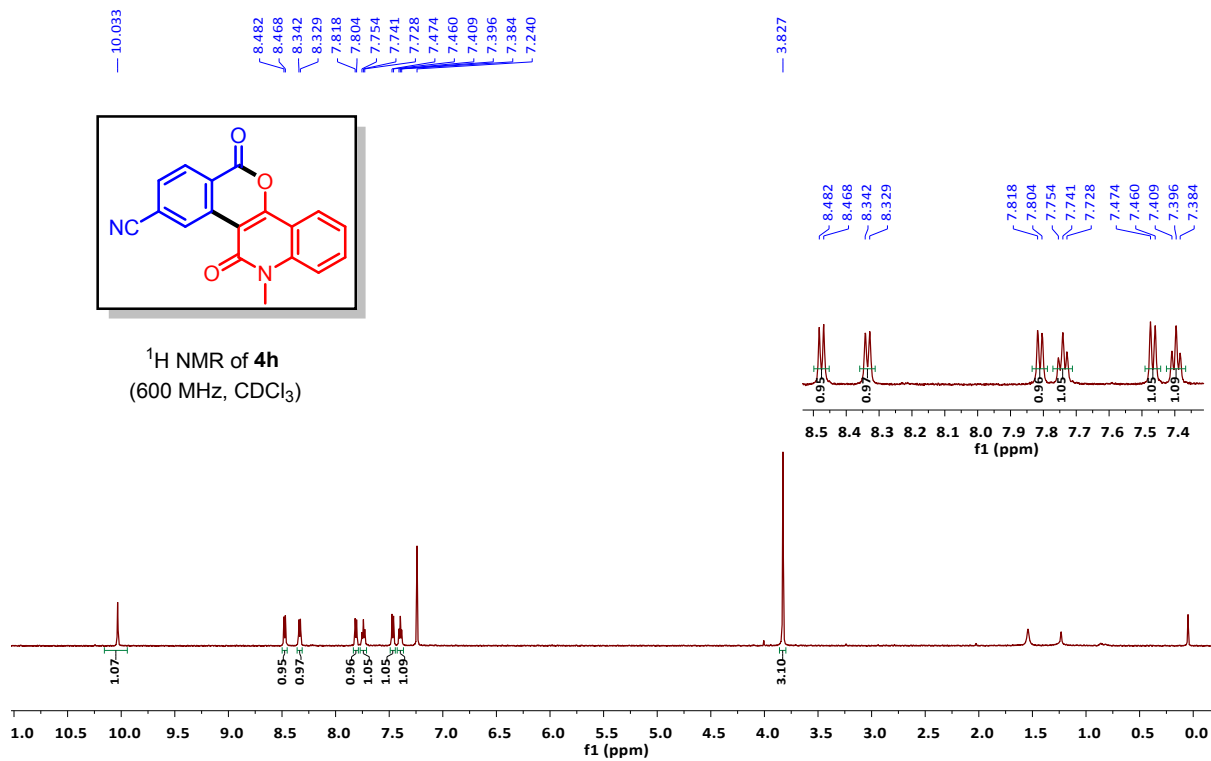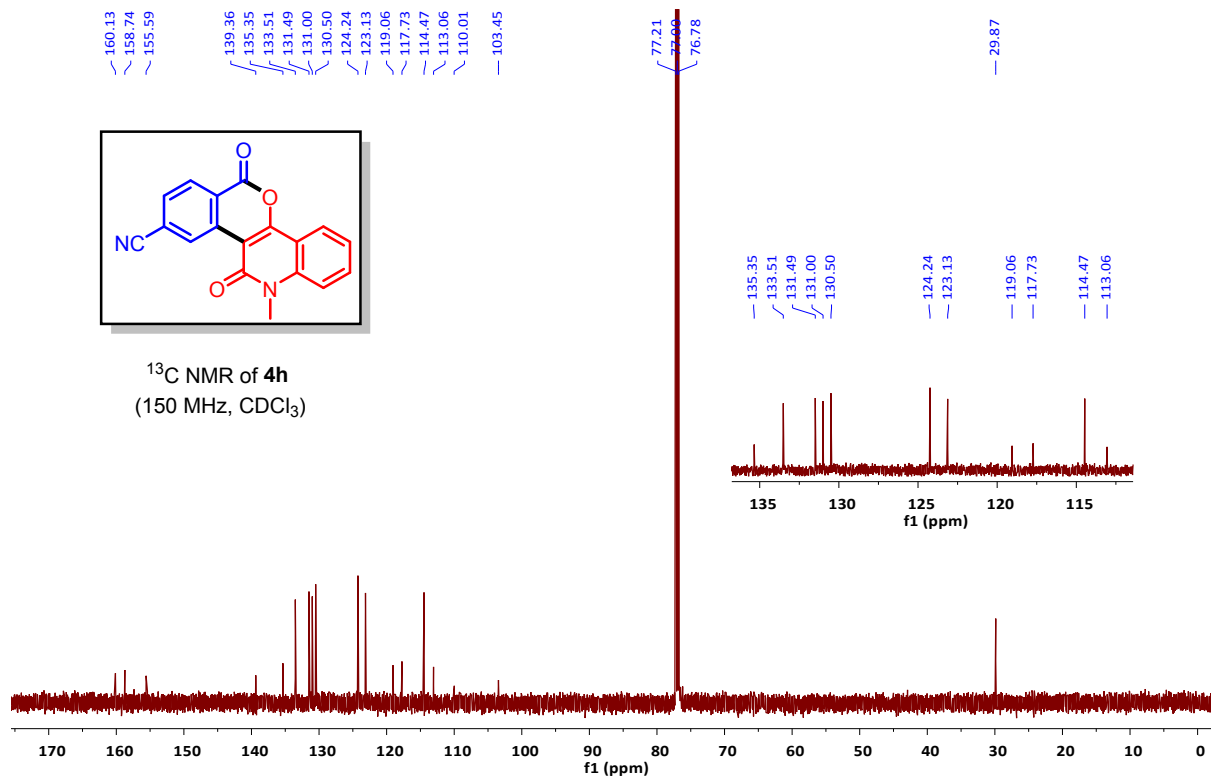

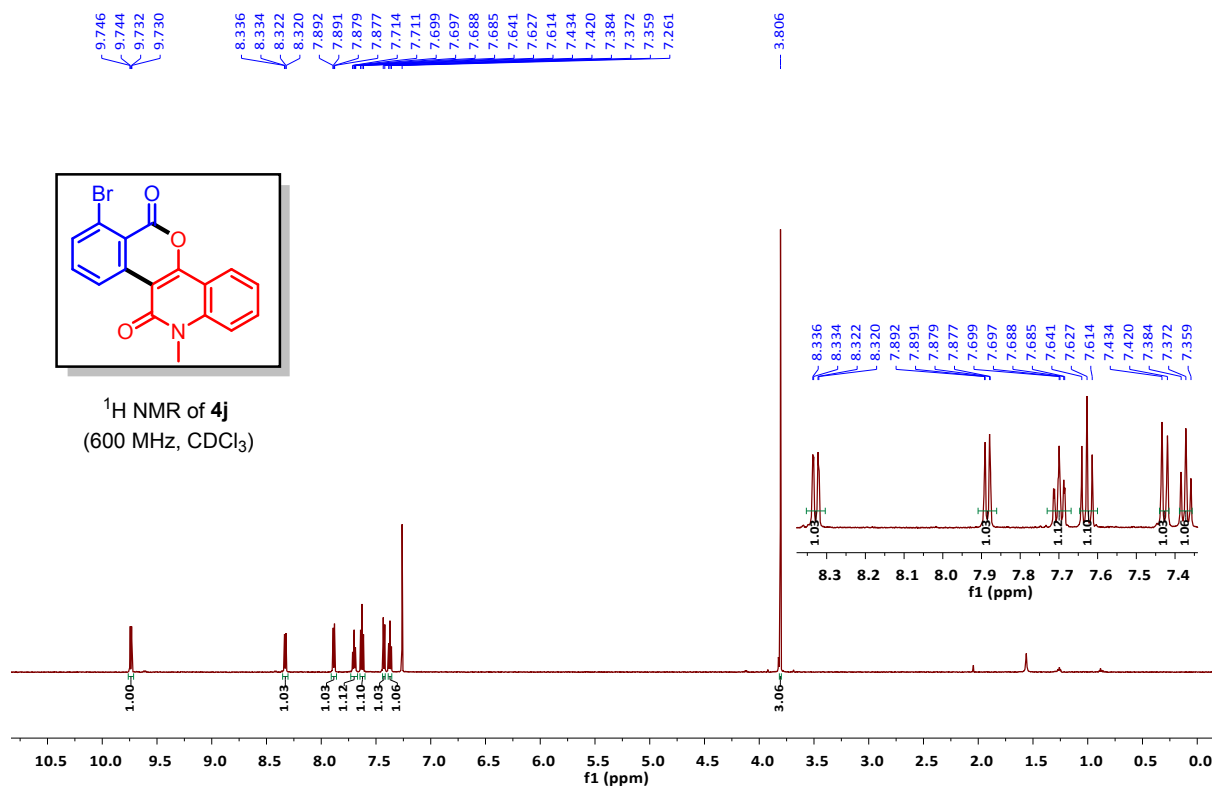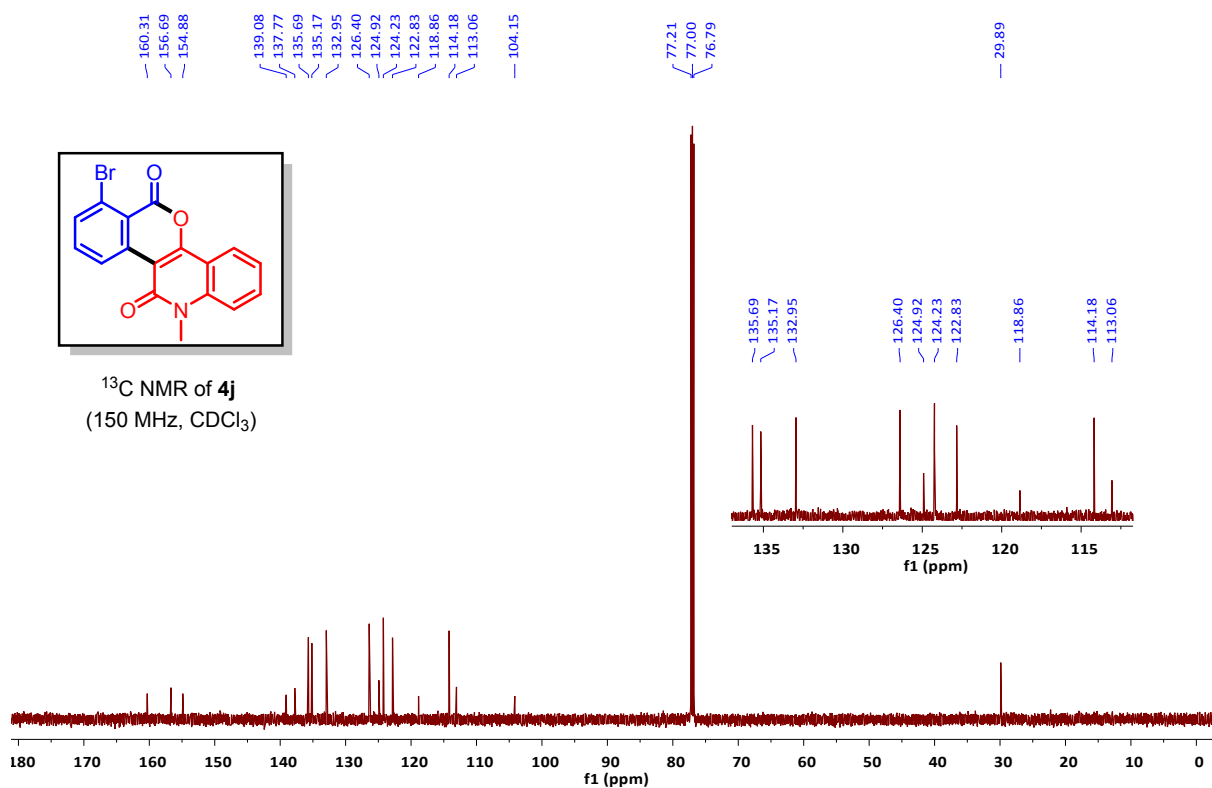

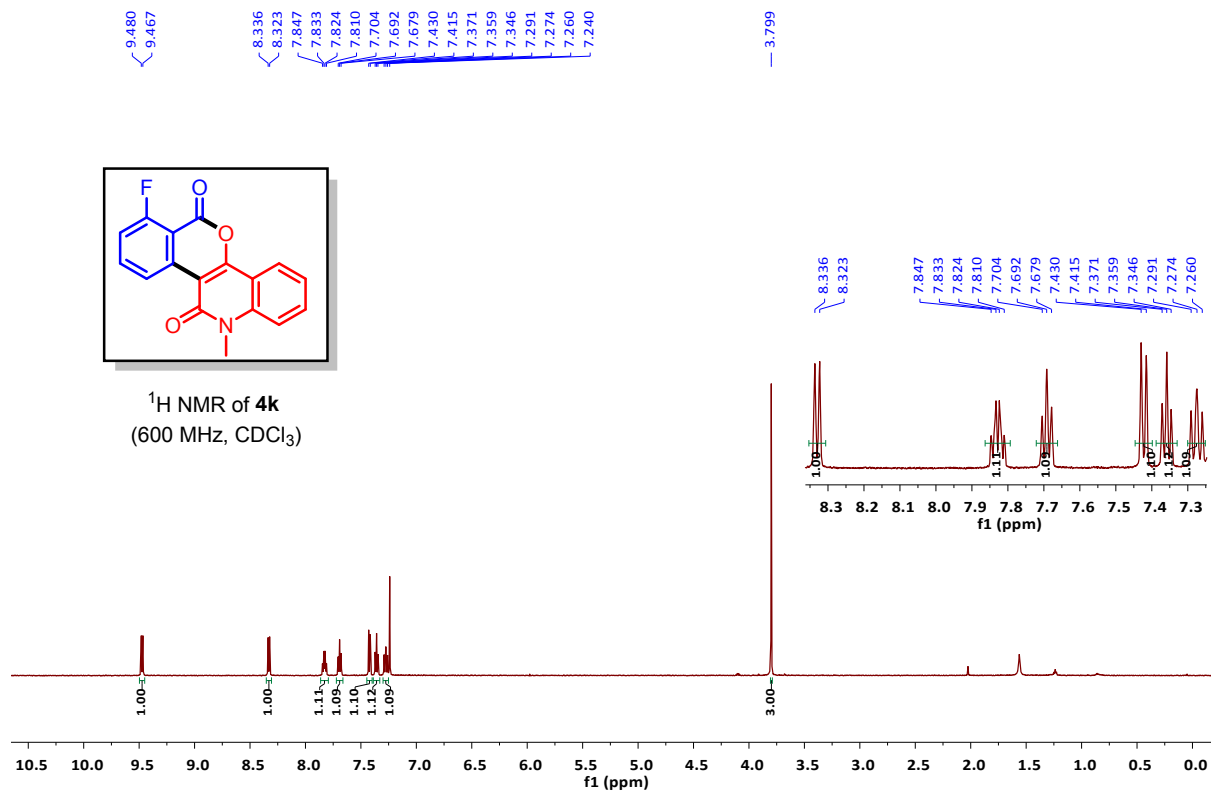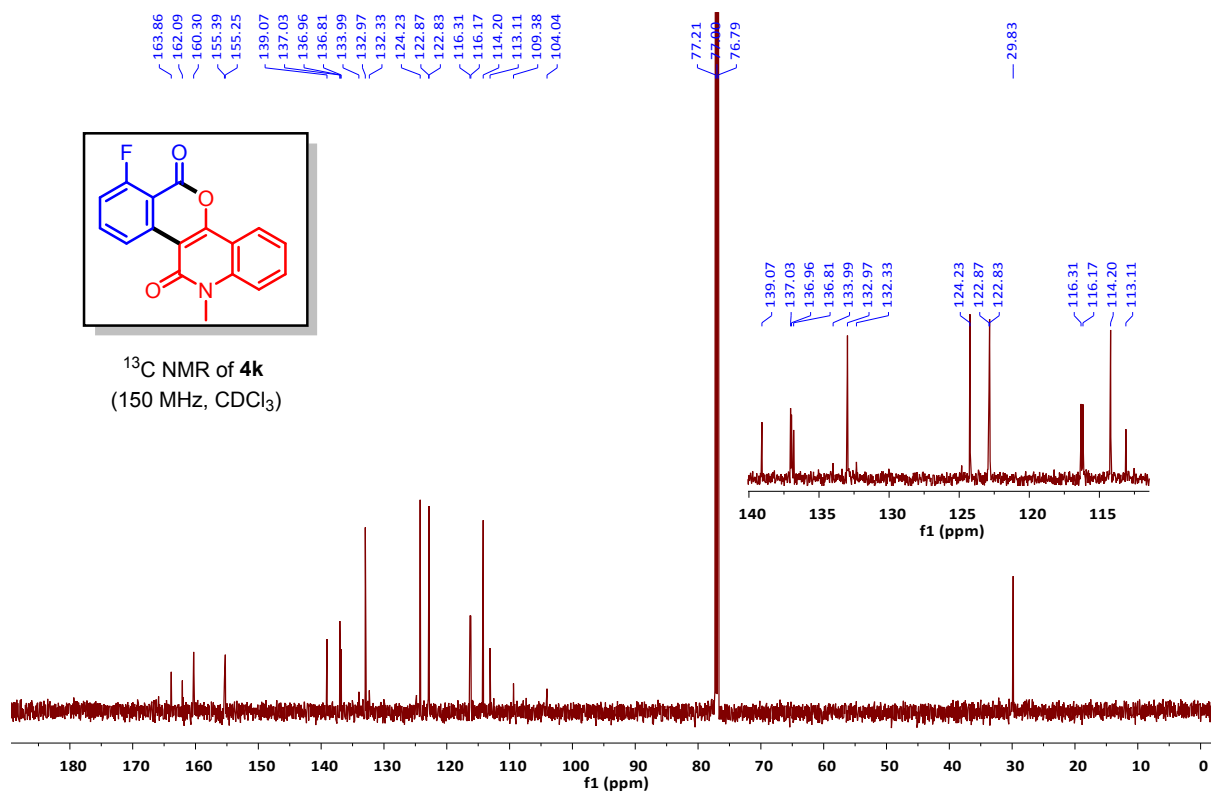

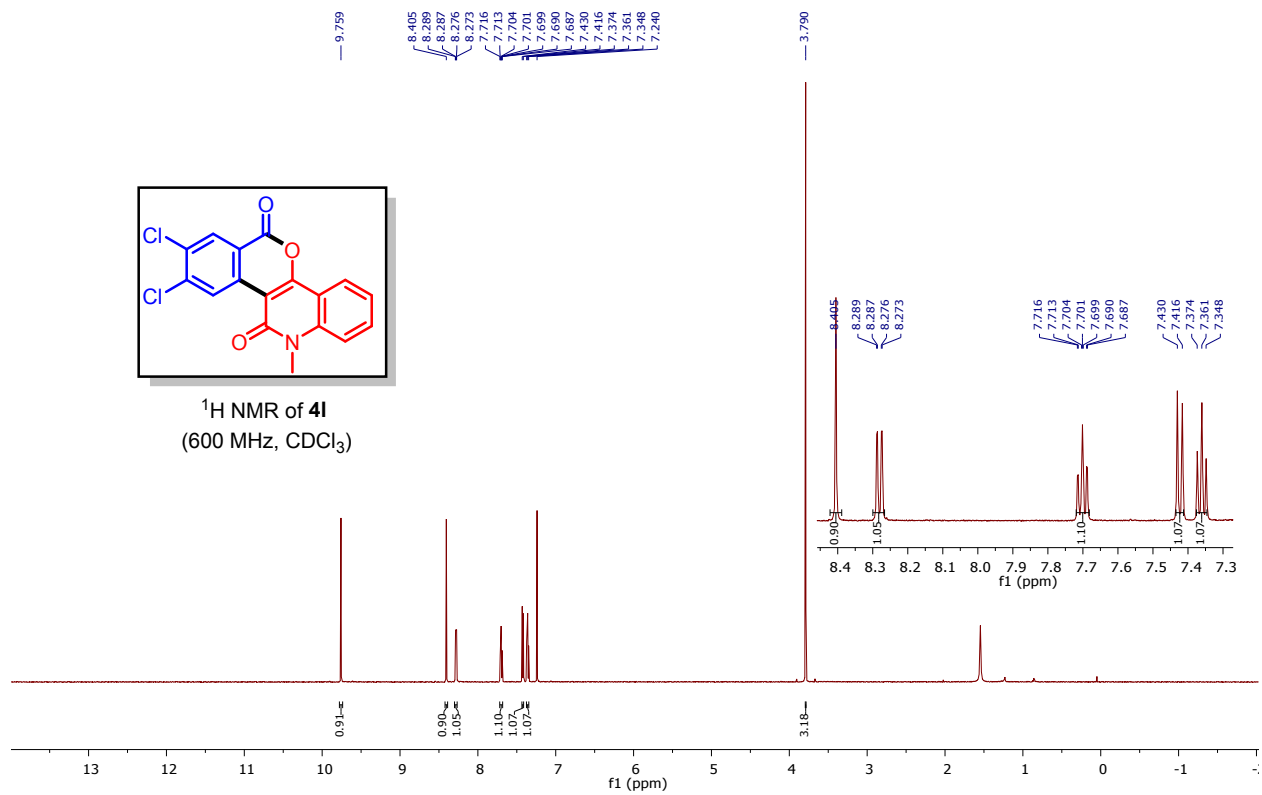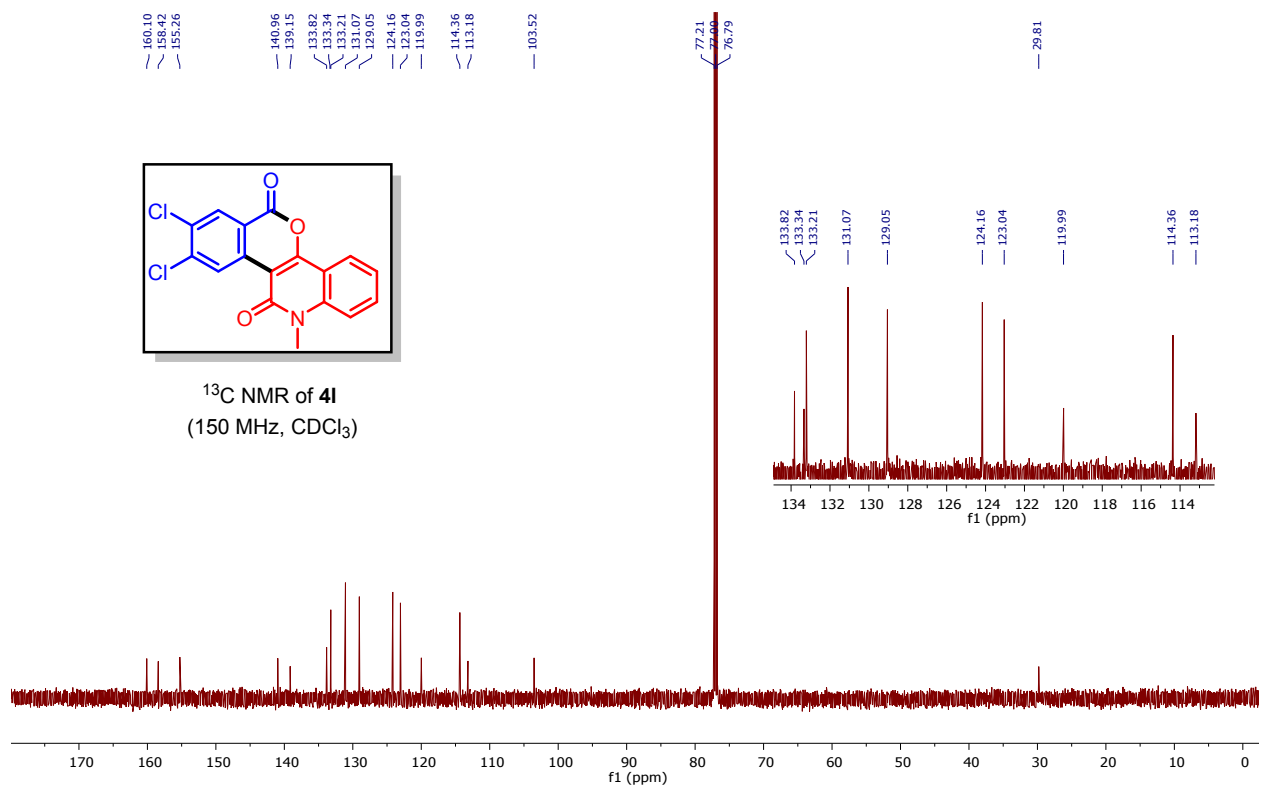

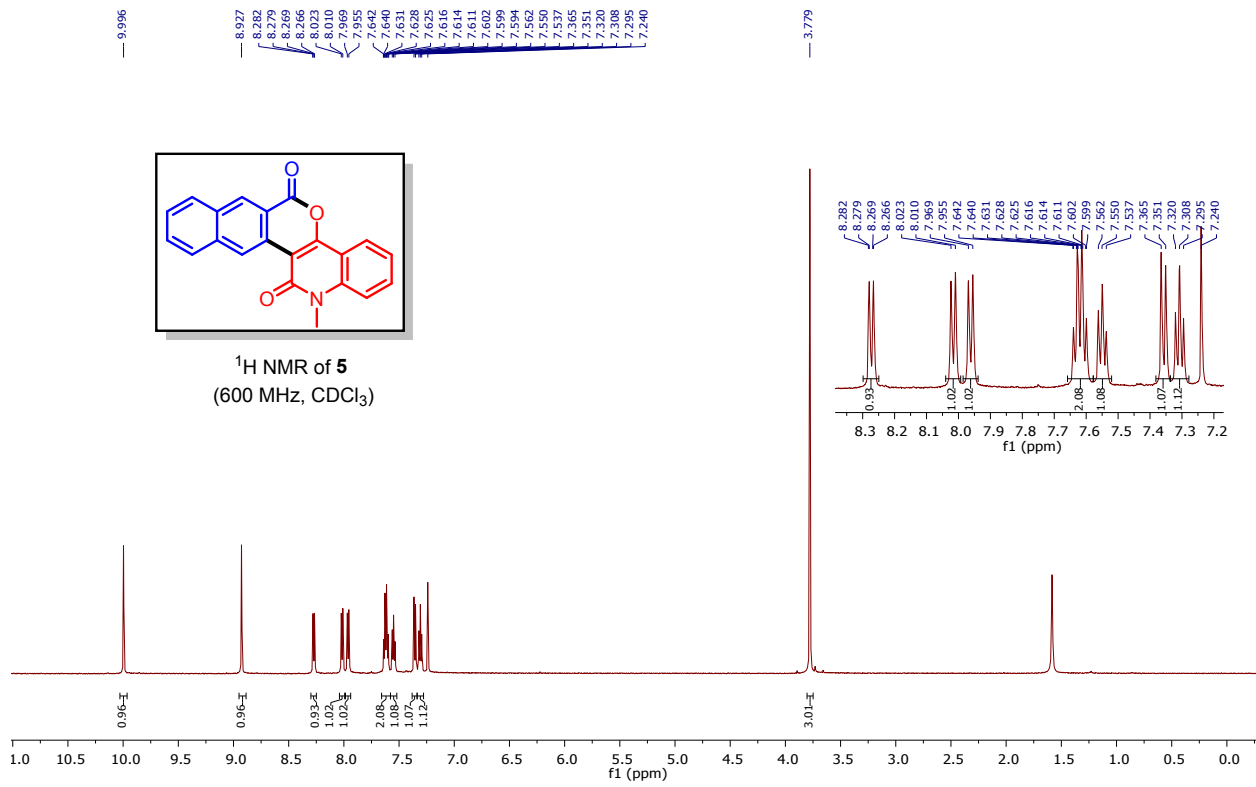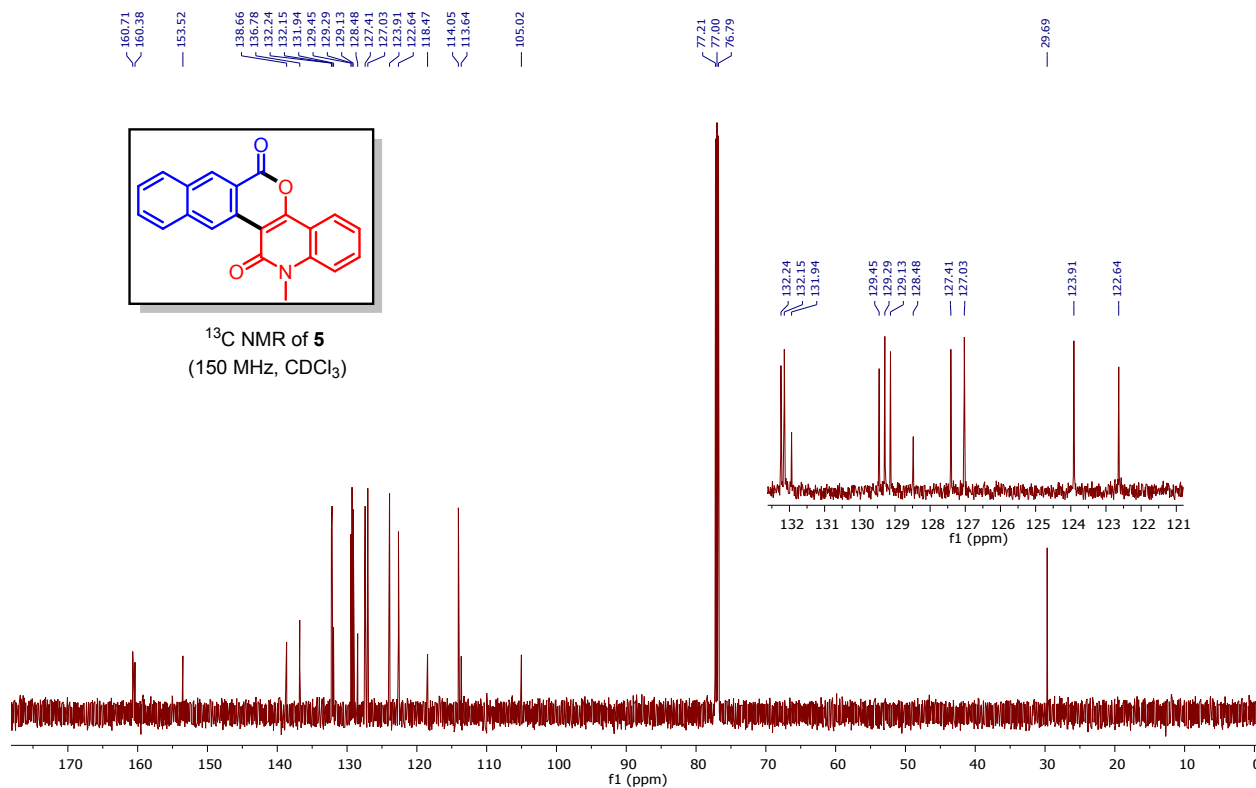





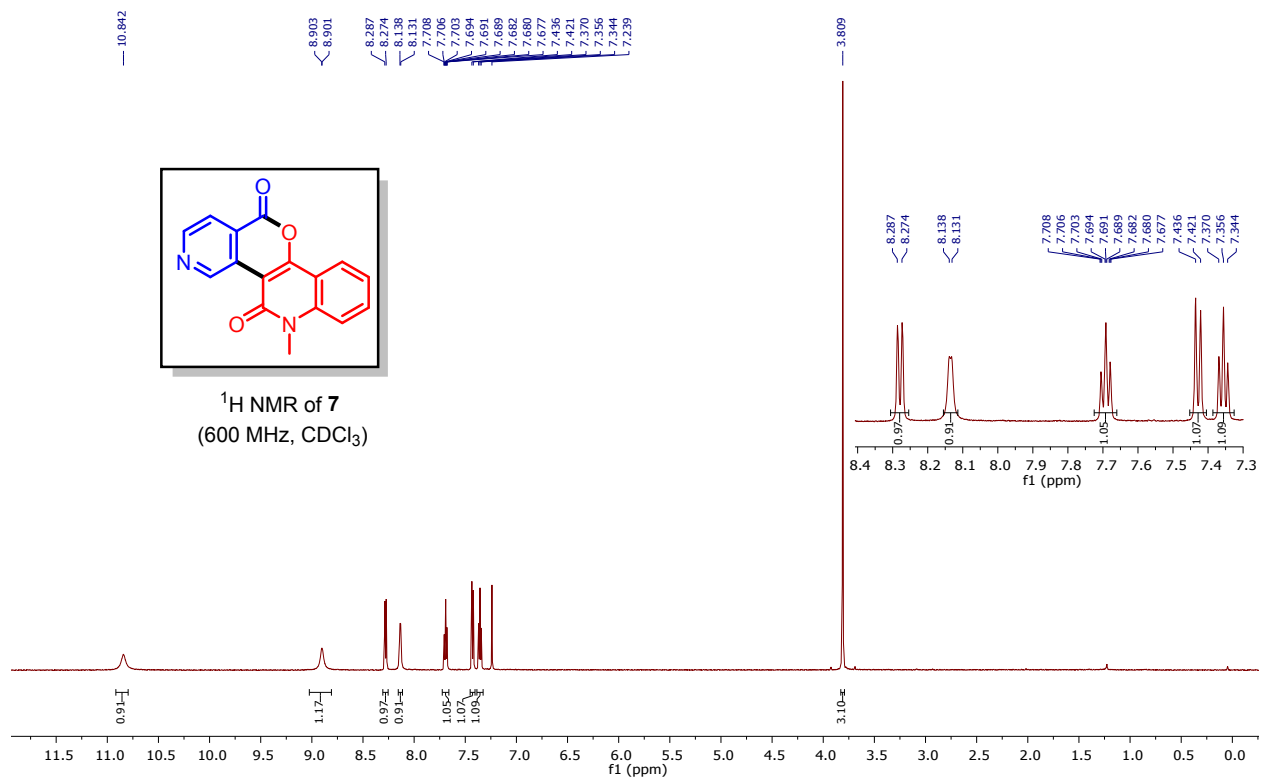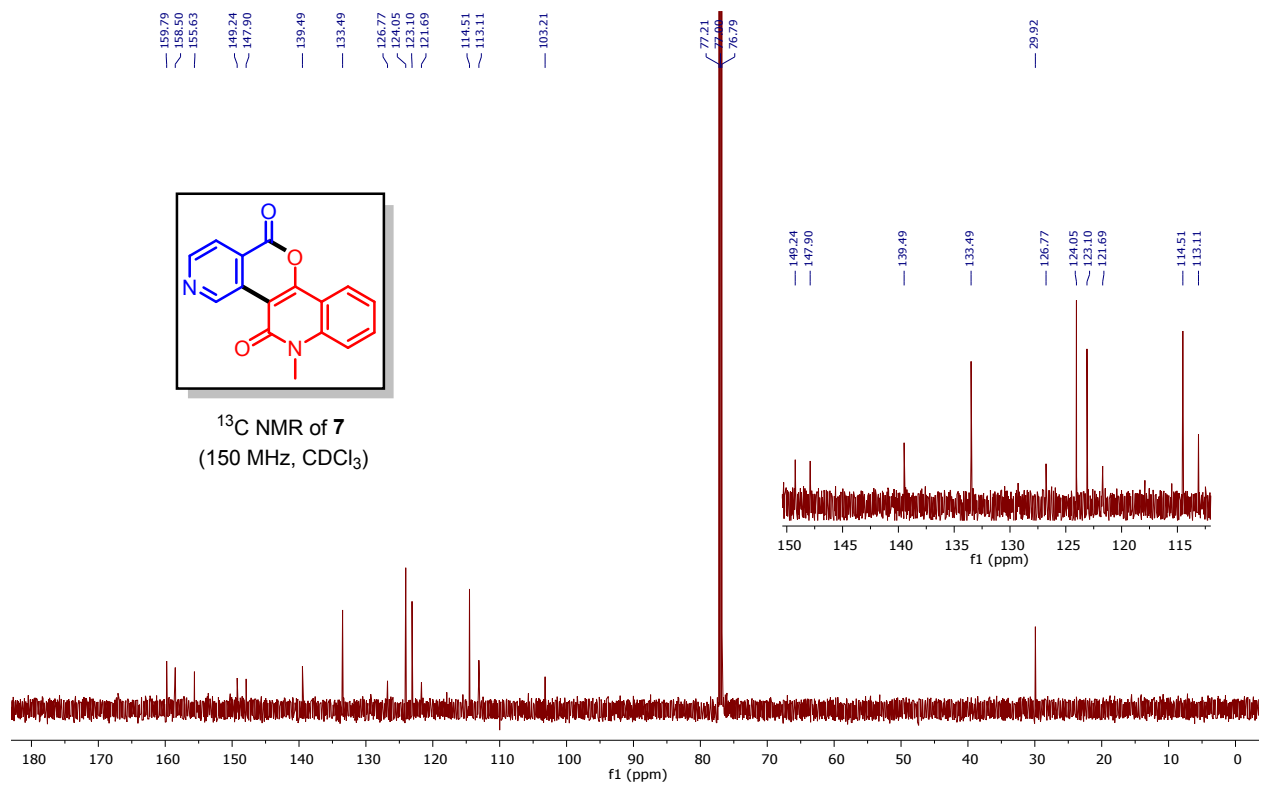

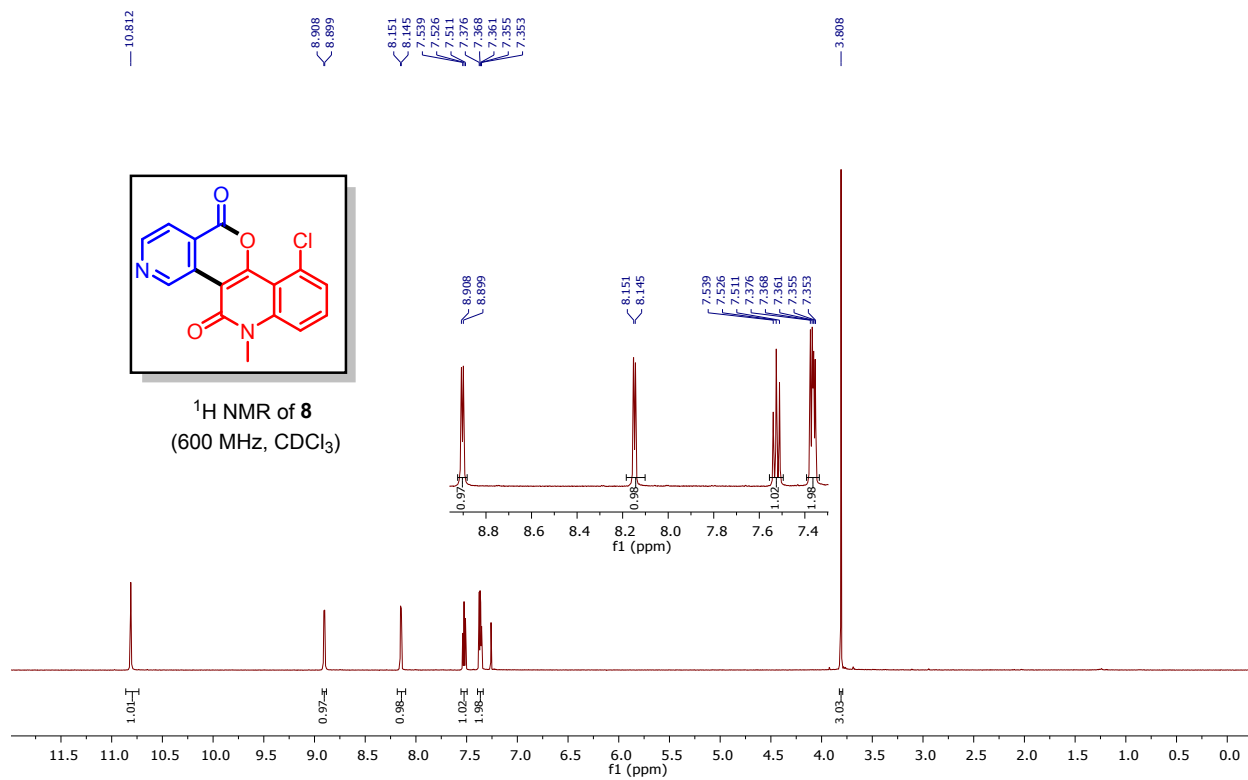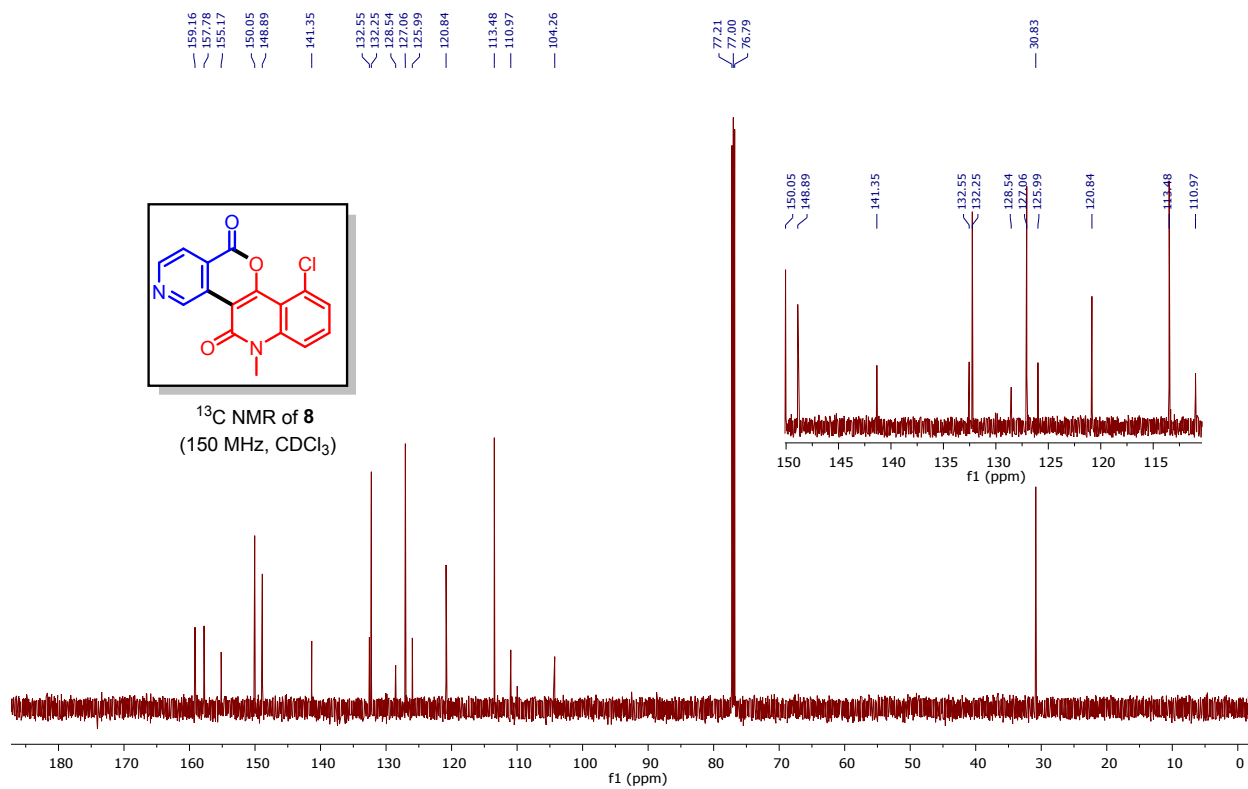

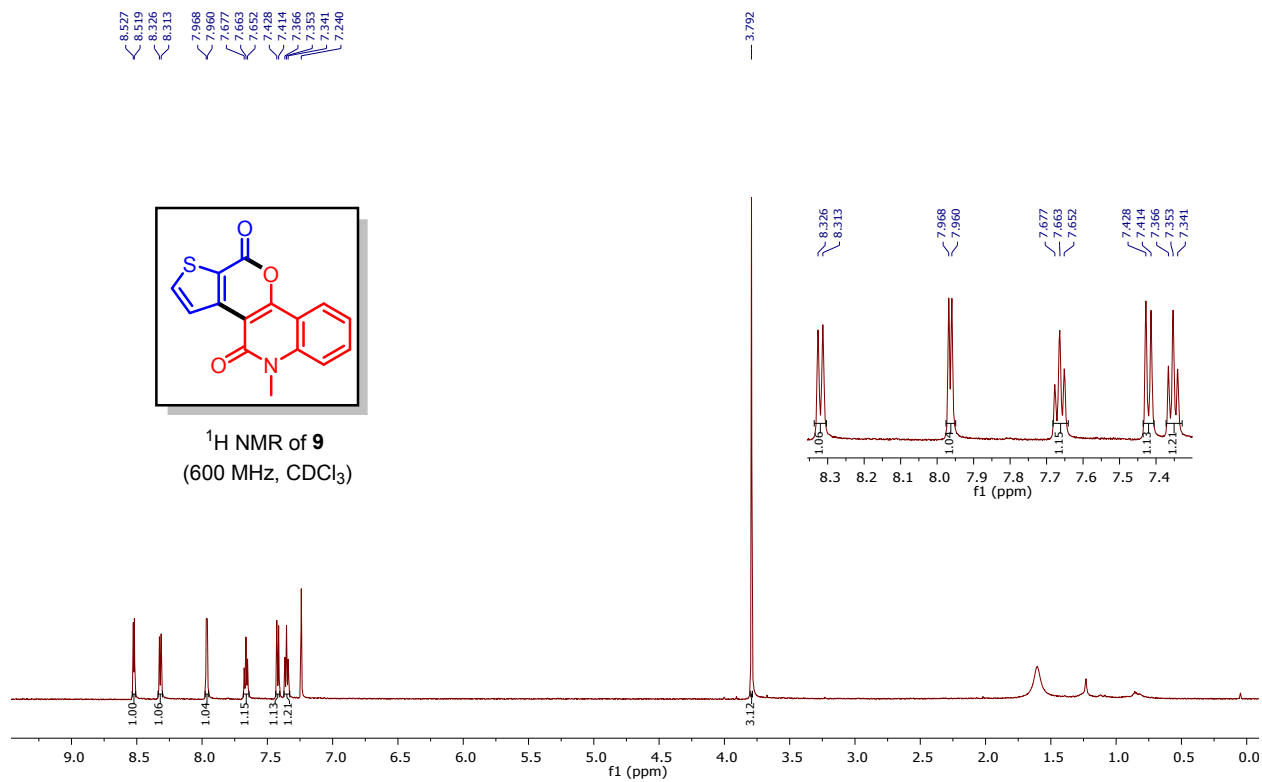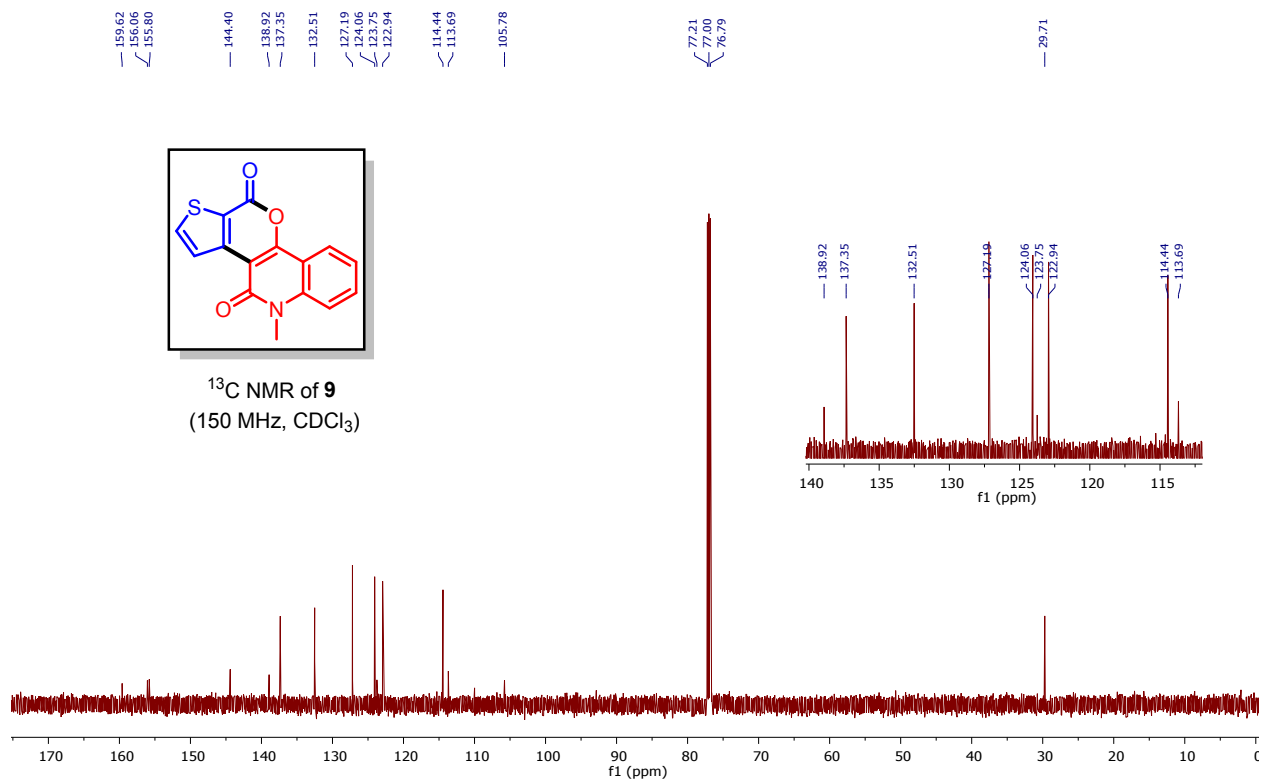

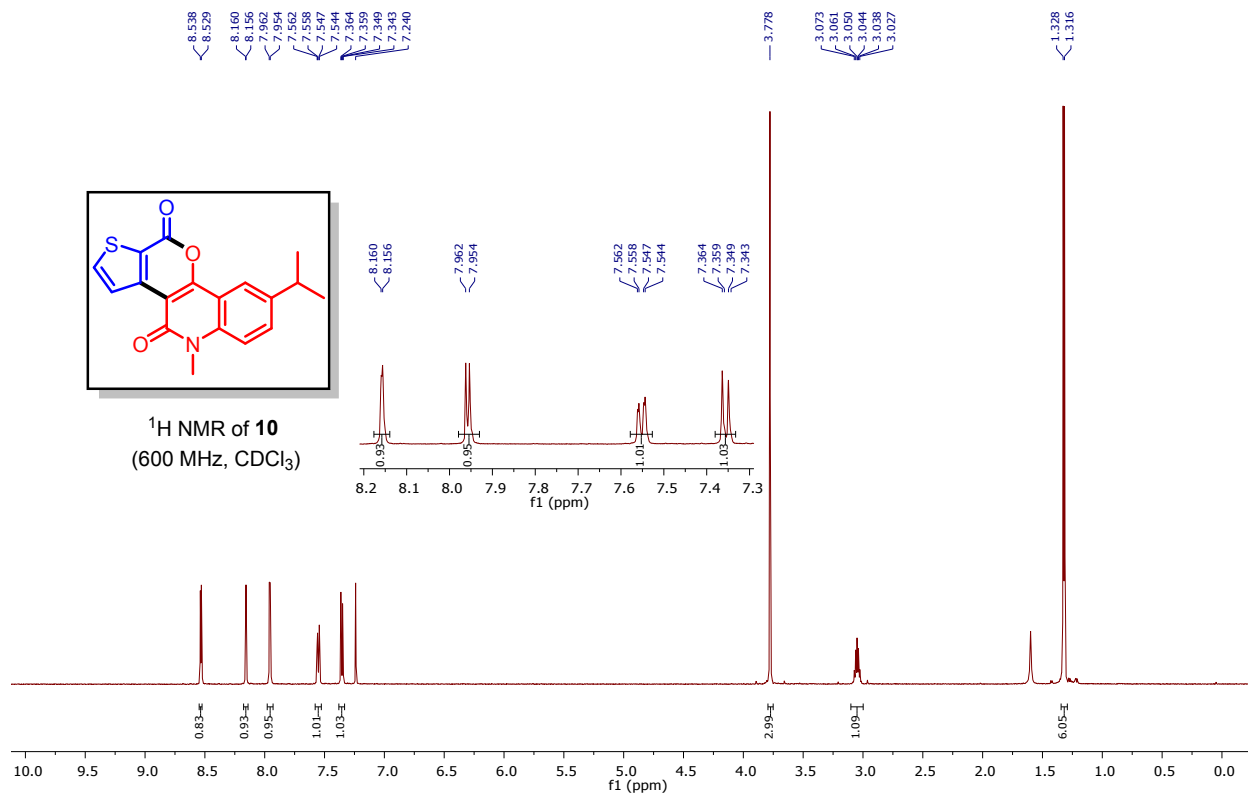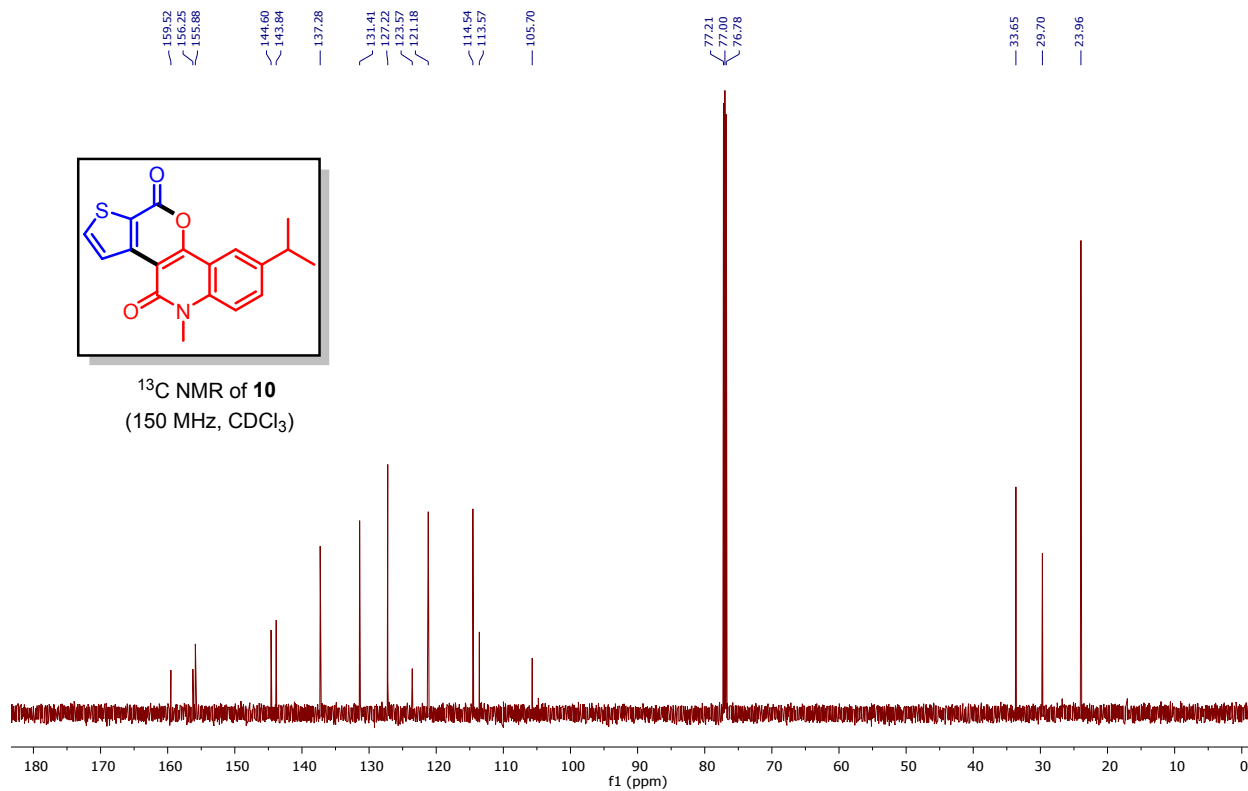

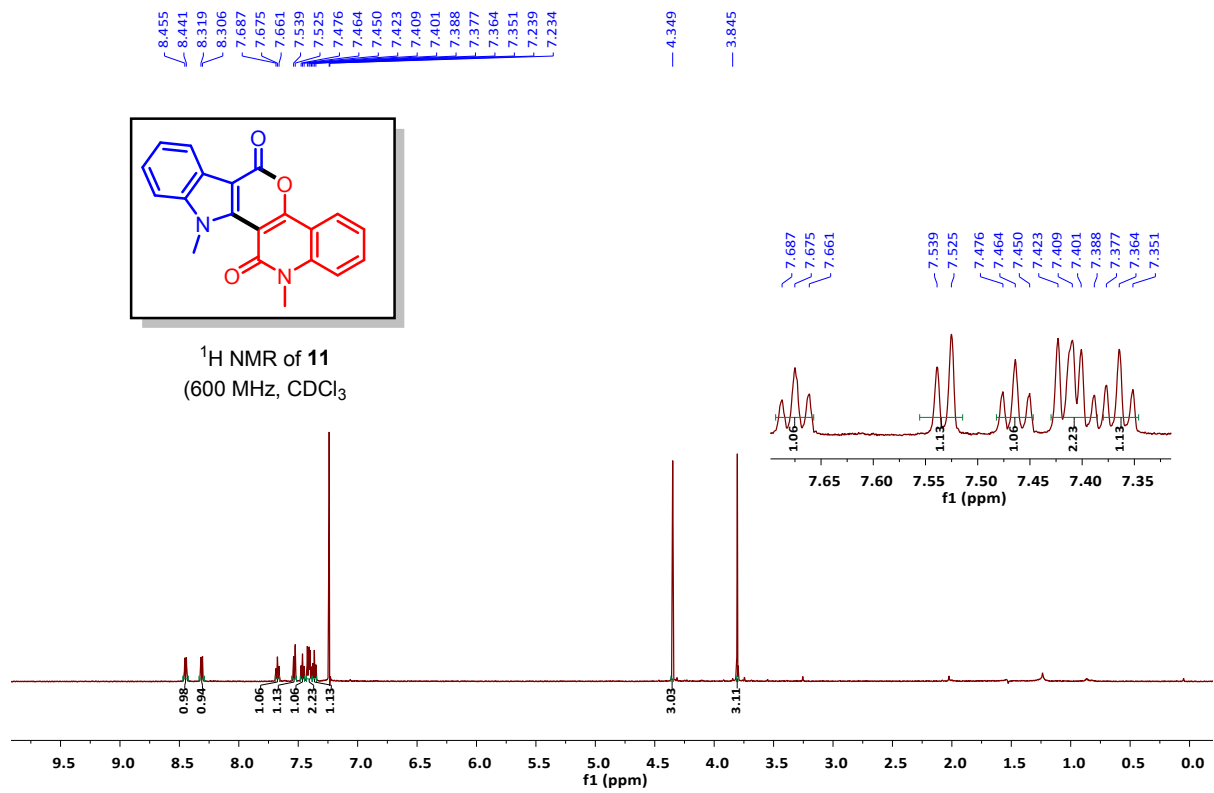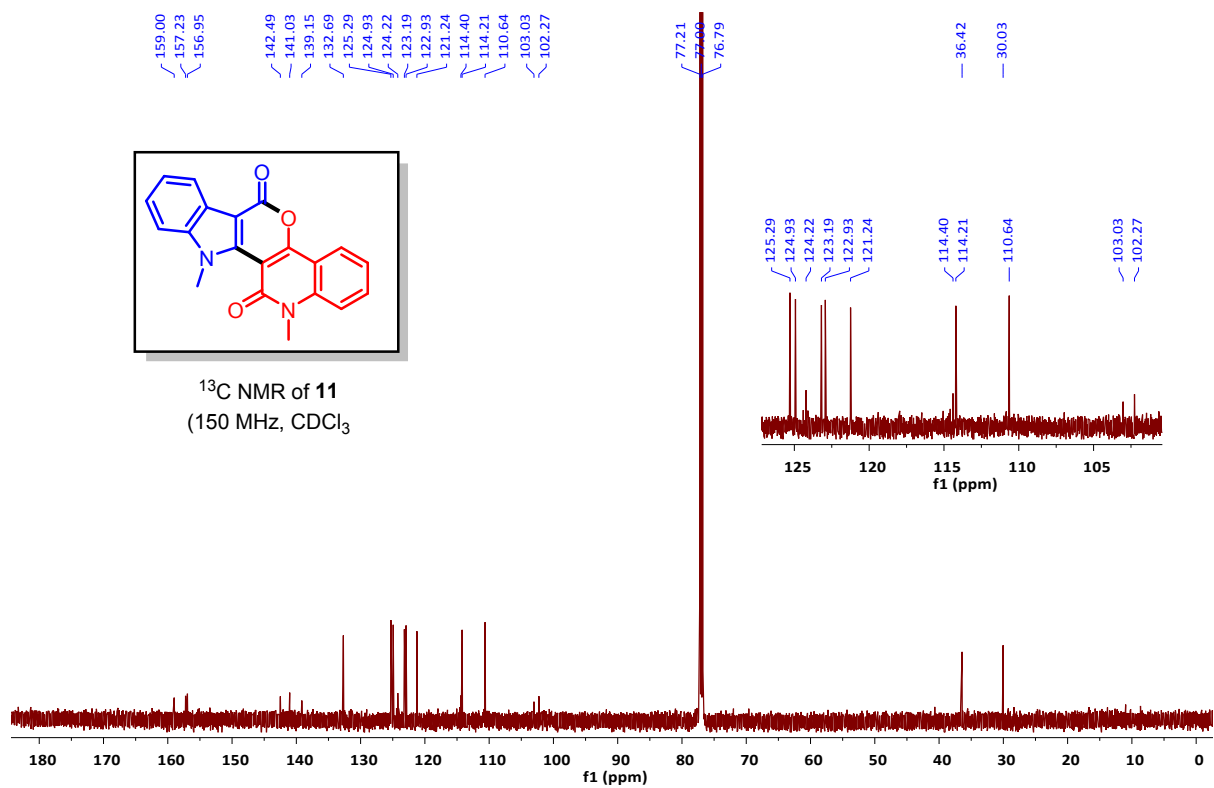

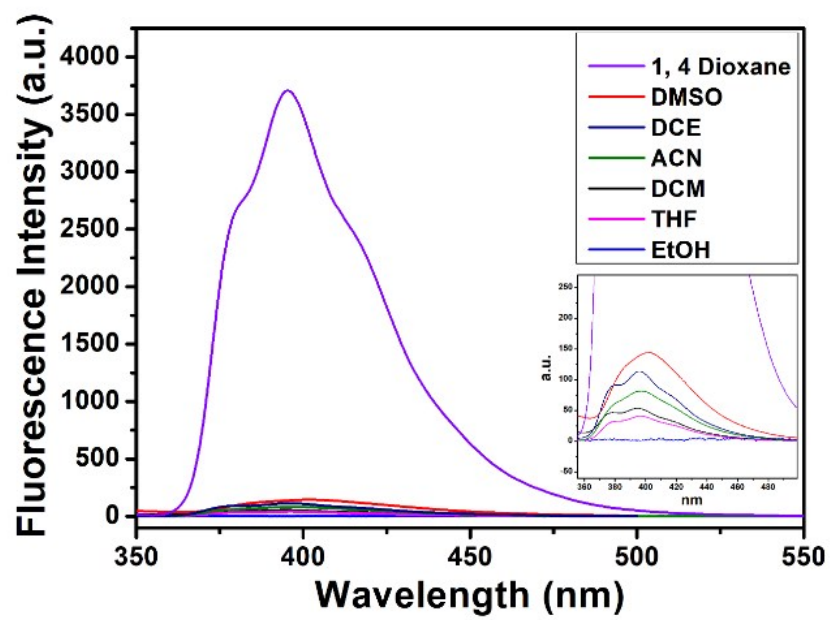

Figure. S1. Fluorescence spectra of 4a in various solvents.

### X-Ray crystallographic structure and data of compound (3j)

X-Ray crystallographic structure and data of compound **3j**: Empirical Formula-  $C_{20}H_{17}NO_3$ ,  $M = 319.35$ , Monoclinic, Space group  $Pbca$ ,  $a = 12.9877(7) \text{ \AA}$ ,  $b = 16.1253(9) \text{ \AA}$ ,  $c = 7.4653(4) \text{ \AA}$ ,  $V = 1525.43(14) \text{ \AA}^3$ ,  $Z = 4$ ,  $T = 223(2) \text{ K}$ ,  $\rho_{\text{calcd}} = 1.391 \text{ Mg/m}^3$ ,  $2\theta_{\text{max.}} = 25.242^\circ$ , Refinement of 220 parameters on 3798 independent reflections out of 49338 collected reflections ( $R_{\text{int}} = 0.0940$ ) led to  $R_1 = 0.0546 [I > 2\sigma(I)]$ ,  $wR_2 = 0.1166$  (all data) and  $S = 1.020$  with the largest difference peak and hole of  $0.429$  and  $-0.278 \text{ e.\AA}^{-3}$  respectively. The crystal structure has been deposited at the Cambridge Crystallographic Data Centre (CCDC 1878962). The data can be obtained free of charge via the Internet at [www.ccdc.cam.ac.uk/data\\_request/cif](http://www.ccdc.cam.ac.uk/data_request/cif).

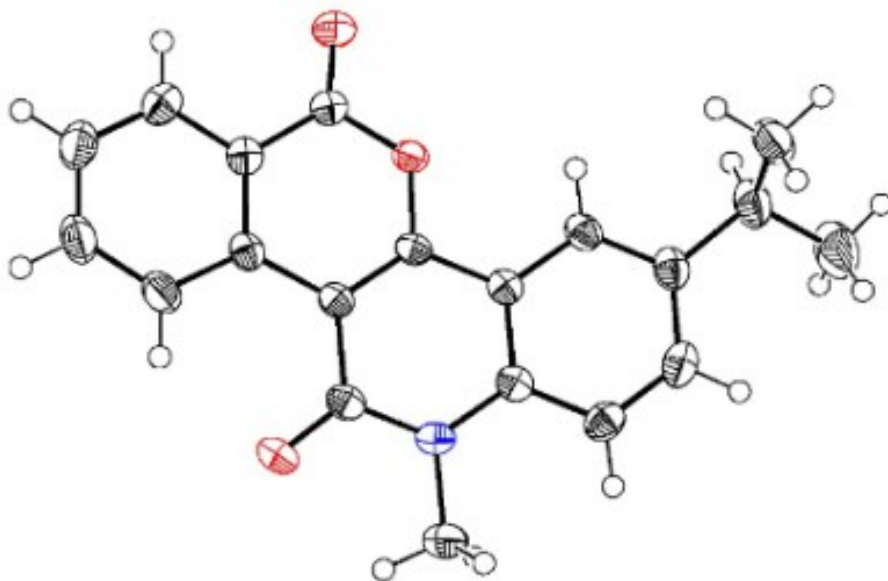

Table 1. Crystal data and structure refinement for No1.

|                                   |                                                  |                    |
|-----------------------------------|--------------------------------------------------|--------------------|
| Identification code               | No1                                              |                    |
| Empirical formula                 | C <sub>20</sub> H <sub>17</sub> N O <sub>3</sub> |                    |
| Formula weight                    | 319.35                                           |                    |
| Temperature                       | 223(2) K                                         |                    |
| Wavelength                        | 0.71073 Å                                        |                    |
| Crystal system                    | Monoclinic                                       |                    |
| Space group                       | P2 <sub>1</sub> /c                               |                    |
| Unit cell dimensions              | a = 12.9877(7) Å                                 | α = 90°.           |
|                                   | b = 16.1253(9) Å                                 | β = 102.6634(19)°. |
|                                   | c = 7.4653(4) Å                                  | γ = 90°.           |
| Volume                            | 1525.43(14) Å <sup>3</sup>                       |                    |
| Z                                 | 4                                                |                    |
| Density (calculated)              | 1.391 Mg/m <sup>3</sup>                          |                    |
| Absorption coefficient            | 0.094 mm <sup>-1</sup>                           |                    |
| F(000)                            | 672                                              |                    |
| Crystal size                      | 0.200 x 0.160 x 0.100 mm <sup>3</sup>            |                    |
| Theta range for data collection   | 2.526 to 28.364°.                                |                    |
| Index ranges                      | -17 ≤ h ≤ 17, -21 ≤ k ≤ 21, -9 ≤ l ≤ 9           |                    |
| Reflections collected             | 49338                                            |                    |
| Independent reflections           | 3798 [R(int) = 0.0940]                           |                    |
| Completeness to theta = 25.242°   | 99.9 %                                           |                    |
| Absorption correction             | Semi-empirical from equivalents                  |                    |
| Max. and min. transmission        | 0.7457 and 0.7178                                |                    |
| Refinement method                 | Full-matrix least-squares on F <sup>2</sup>      |                    |
| Data / restraints / parameters    | 3798 / 0 / 220                                   |                    |
| Goodness-of-fit on F <sup>2</sup> | 1.020                                            |                    |
| Final R indices [I > 2σ(I)]       | R1 = 0.0546, wR2 = 0.1166                        |                    |
| R indices (all data)              | R1 = 0.0987, wR2 = 0.1386                        |                    |
| Extinction coefficient            | n/a                                              |                    |
| Largest diff. peak and hole       | 0.429 and -0.278 e.Å <sup>-3</sup>               |                    |



Table 2. Atomic coordinates ( $\times 10^4$ ) and equivalent isotropic displacement parameters ( $\text{\AA}^2 \times 10^3$ ) for No1.  $U(\text{eq})$  is defined as one third of the trace of the orthogonalized  $U^{ij}$  tensor.

|       | x        | y       | z        | $U(\text{eq})$ |
|-------|----------|---------|----------|----------------|
| O(1)  | -696(1)  | 6661(1) | 217(2)   | 26(1)          |
| C(1)  | -1554(1) | 7091(1) | -737(2)  | 27(1)          |
| C(2)  | -2591(1) | 6757(1) | -712(2)  | 27(1)          |
| C(3)  | -3466(2) | 7224(1) | -1565(3) | 36(1)          |
| C(4)  | -4463(2) | 6961(1) | -1508(3) | 42(1)          |
| C(5)  | -4588(2) | 6243(1) | -572(3)  | 43(1)          |
| C(6)  | -3732(2) | 5766(1) | 255(3)   | 37(1)          |
| C(7)  | -2704(1) | 6006(1) | 182(2)   | 26(1)          |
| C(8)  | -1747(1) | 5554(1) | 1002(2)  | 24(1)          |
| C(9)  | -1756(2) | 4708(1) | 1726(2)  | 27(1)          |
| N(1)  | -788(1)  | 4364(1) | 2539(2)  | 26(1)          |
| C(10) | 167(1)   | 4785(1) | 2758(2)  | 25(1)          |
| C(11) | 1115(2)  | 4451(1) | 3737(3)  | 32(1)          |
| C(12) | 2041(2)  | 4890(1) | 3909(3)  | 35(1)          |
| C(13) | 2084(2)  | 5673(1) | 3110(3)  | 33(1)          |
| C(14) | 1148(1)  | 5995(1) | 2138(3)  | 29(1)          |
| C(15) | 188(1)   | 5571(1) | 1961(2)  | 24(1)          |
| C(16) | -798(1)  | 5917(1) | 1040(2)  | 23(1)          |
| O(2)  | -1366(1) | 7713(1) | -1499(2) | 39(1)          |
| O(3)  | -2571(1) | 4303(1) | 1600(2)  | 39(1)          |
| C(17) | -784(2)  | 3506(1) | 3191(3)  | 36(1)          |
| C(18) | 3086(2)  | 6192(2) | 3301(3)  | 44(1)          |
| C(19) | 4085(2)  | 5709(2) | 3842(4)  | 65(1)          |
| C(20) | 3055(2)  | 6921(1) | 4559(3)  | 45(1)          |

Table 3. Bond lengths [ $\text{\AA}$ ] and angles [ $^\circ$ ] for No1.

---

|              |          |
|--------------|----------|
| O(1)-C(16)   | 1.367(2) |
| O(1)-C(1)    | 1.372(2) |
| C(1)-O(2)    | 1.203(2) |
| C(1)-C(2)    | 1.454(3) |
| C(2)-C(3)    | 1.395(3) |
| C(2)-C(7)    | 1.405(3) |
| C(3)-C(4)    | 1.373(3) |
| C(3)-H(3)    | 0.9400   |
| C(4)-C(5)    | 1.380(3) |
| C(4)-H(4)    | 0.9400   |
| C(5)-C(6)    | 1.380(3) |
| C(5)-H(5)    | 0.9400   |
| C(6)-C(7)    | 1.404(3) |
| C(6)-H(6)    | 0.9400   |
| C(7)-C(8)    | 1.455(2) |
| C(8)-C(16)   | 1.359(2) |
| C(8)-C(9)    | 1.468(2) |
| C(9)-O(3)    | 1.231(2) |
| C(9)-N(1)    | 1.387(2) |
| N(1)-C(10)   | 1.392(2) |
| N(1)-C(17)   | 1.466(2) |
| C(10)-C(11)  | 1.395(3) |
| C(10)-C(15)  | 1.402(2) |
| C(11)-C(12)  | 1.377(3) |
| C(11)-H(11)  | 0.9400   |
| C(12)-C(13)  | 1.402(3) |
| C(12)-H(12)  | 0.9400   |
| C(13)-C(14)  | 1.374(3) |
| C(13)-C(18)  | 1.528(3) |
| C(14)-C(15)  | 1.402(2) |
| C(14)-H(14)  | 0.9400   |
| C(15)-C(16)  | 1.427(2) |
| C(17)-H(17A) | 0.9700   |
| C(17)-H(17B) | 0.9700   |

|              |          |
|--------------|----------|
| C(17)-H(17C) | 0.9700   |
| C(18)-C(19)  | 1.492(3) |
| C(18)-C(20)  | 1.510(3) |
| C(18)-H(18)  | 0.9900   |
| C(19)-H(19A) | 0.9700   |
| C(19)-H(19B) | 0.9700   |
| C(19)-H(19C) | 0.9700   |
| C(20)-H(20A) | 0.9700   |
| C(20)-H(20B) | 0.9700   |
| C(20)-H(20C) | 0.9700   |

|                 |            |
|-----------------|------------|
| C(16)-O(1)-C(1) | 122.04(14) |
| O(2)-C(1)-O(1)  | 116.21(17) |
| O(2)-C(1)-C(2)  | 126.77(18) |
| O(1)-C(1)-C(2)  | 117.02(16) |
| C(3)-C(2)-C(7)  | 121.50(18) |
| C(3)-C(2)-C(1)  | 117.25(17) |
| C(7)-C(2)-C(1)  | 121.23(17) |
| C(4)-C(3)-C(2)  | 119.9(2)   |
| C(4)-C(3)-H(3)  | 120.1      |
| C(2)-C(3)-H(3)  | 120.1      |
| C(3)-C(4)-C(5)  | 119.5(2)   |
| C(3)-C(4)-H(4)  | 120.3      |
| C(5)-C(4)-H(4)  | 120.3      |
| C(6)-C(5)-C(4)  | 121.4(2)   |
| C(6)-C(5)-H(5)  | 119.3      |
| C(4)-C(5)-H(5)  | 119.3      |
| C(5)-C(6)-C(7)  | 120.6(2)   |
| C(5)-C(6)-H(6)  | 119.7      |
| C(7)-C(6)-H(6)  | 119.7      |
| C(6)-C(7)-C(2)  | 117.09(17) |
| C(6)-C(7)-C(8)  | 125.28(18) |
| C(2)-C(7)-C(8)  | 117.60(16) |
| C(16)-C(8)-C(7) | 118.70(16) |
| C(16)-C(8)-C(9) | 118.19(16) |
| C(7)-C(8)-C(9)  | 123.06(16) |

|                     |            |
|---------------------|------------|
| O(3)-C(9)-N(1)      | 120.23(17) |
| O(3)-C(9)-C(8)      | 122.79(17) |
| N(1)-C(9)-C(8)      | 116.97(15) |
| C(9)-N(1)-C(10)     | 123.69(15) |
| C(9)-N(1)-C(17)     | 117.39(16) |
| C(10)-N(1)-C(17)    | 118.91(16) |
| N(1)-C(10)-C(11)    | 122.30(17) |
| N(1)-C(10)-C(15)    | 119.40(16) |
| C(11)-C(10)-C(15)   | 118.30(17) |
| C(12)-C(11)-C(10)   | 120.20(18) |
| C(12)-C(11)-H(11)   | 119.9      |
| C(10)-C(11)-H(11)   | 119.9      |
| C(11)-C(12)-C(13)   | 122.57(18) |
| C(11)-C(12)-H(12)   | 118.7      |
| C(13)-C(12)-H(12)   | 118.7      |
| C(14)-C(13)-C(12)   | 116.87(18) |
| C(14)-C(13)-C(18)   | 118.61(19) |
| C(12)-C(13)-C(18)   | 124.50(18) |
| C(13)-C(14)-C(15)   | 122.06(18) |
| C(13)-C(14)-H(14)   | 119.0      |
| C(15)-C(14)-H(14)   | 119.0      |
| C(14)-C(15)-C(10)   | 119.99(17) |
| C(14)-C(15)-C(16)   | 122.68(17) |
| C(10)-C(15)-C(16)   | 117.30(16) |
| C(8)-C(16)-O(1)     | 122.97(16) |
| C(8)-C(16)-C(15)    | 123.77(16) |
| O(1)-C(16)-C(15)    | 113.26(15) |
| N(1)-C(17)-H(17A)   | 109.5      |
| N(1)-C(17)-H(17B)   | 109.5      |
| H(17A)-C(17)-H(17B) | 109.5      |
| N(1)-C(17)-H(17C)   | 109.5      |
| H(17A)-C(17)-H(17C) | 109.5      |
| H(17B)-C(17)-H(17C) | 109.5      |
| C(19)-C(18)-C(20)   | 112.23(19) |
| C(19)-C(18)-C(13)   | 114.3(2)   |
| C(20)-C(18)-C(13)   | 110.23(17) |

|                     |       |
|---------------------|-------|
| C(19)-C(18)-H(18)   | 106.5 |
| C(20)-C(18)-H(18)   | 106.5 |
| C(13)-C(18)-H(18)   | 106.5 |
| C(18)-C(19)-H(19A)  | 109.5 |
| C(18)-C(19)-H(19B)  | 109.5 |
| H(19A)-C(19)-H(19B) | 109.5 |
| C(18)-C(19)-H(19C)  | 109.5 |
| H(19A)-C(19)-H(19C) | 109.5 |
| H(19B)-C(19)-H(19C) | 109.5 |
| C(18)-C(20)-H(20A)  | 109.5 |
| C(18)-C(20)-H(20B)  | 109.5 |
| H(20A)-C(20)-H(20B) | 109.5 |
| C(18)-C(20)-H(20C)  | 109.5 |
| H(20A)-C(20)-H(20C) | 109.5 |
| H(20B)-C(20)-H(20C) | 109.5 |

---

Symmetry transformations used to generate equivalent atoms:

Table 4. Anisotropic displacement parameters ( $\text{\AA}^2 \times 10^3$ ) for No1. The anisotropic displacement factor exponent takes the form:  $-2\pi^2 [ h^2 a^{*2} U^{11} + \dots + 2 h k a^* b^* U^{12} ]$

|       | U <sup>11</sup> | U <sup>22</sup> | U <sup>33</sup> | U <sup>23</sup> | U <sup>13</sup> | U <sup>12</sup> |
|-------|-----------------|-----------------|-----------------|-----------------|-----------------|-----------------|
| O(1)  | 26(1)           | 22(1)           | 31(1)           | 1(1)            | 8(1)            | -2(1)           |
| C(1)  | 31(1)           | 26(1)           | 24(1)           | -1(1)           | 7(1)            | 1(1)            |
| C(2)  | 29(1)           | 29(1)           | 24(1)           | -4(1)           | 7(1)            | 0(1)            |
| C(3)  | 36(1)           | 37(1)           | 34(1)           | 3(1)            | 4(1)            | 6(1)            |
| C(4)  | 31(1)           | 45(1)           | 47(1)           | -4(1)           | 0(1)            | 6(1)            |
| C(5)  | 24(1)           | 44(1)           | 61(2)           | -10(1)          | 7(1)            | -4(1)           |
| C(6)  | 30(1)           | 33(1)           | 50(1)           | -6(1)           | 10(1)           | -6(1)           |
| C(7)  | 26(1)           | 27(1)           | 26(1)           | -7(1)           | 6(1)            | -2(1)           |
| C(8)  | 27(1)           | 24(1)           | 24(1)           | -4(1)           | 6(1)            | -2(1)           |
| C(9)  | 32(1)           | 26(1)           | 26(1)           | -4(1)           | 8(1)            | -4(1)           |
| N(1)  | 32(1)           | 22(1)           | 27(1)           | 0(1)            | 9(1)            | -1(1)           |
| C(10) | 30(1)           | 24(1)           | 21(1)           | -6(1)           | 7(1)            | -1(1)           |
| C(11) | 38(1)           | 31(1)           | 28(1)           | 0(1)            | 5(1)            | 5(1)            |
| C(12) | 30(1)           | 41(1)           | 33(1)           | -5(1)           | 1(1)            | 8(1)            |
| C(13) | 26(1)           | 35(1)           | 37(1)           | -9(1)           | 6(1)            | 0(1)            |
| C(14) | 28(1)           | 27(1)           | 33(1)           | -5(1)           | 9(1)            | -3(1)           |
| C(15) | 27(1)           | 24(1)           | 23(1)           | -6(1)           | 8(1)            | -1(1)           |
| C(16) | 28(1)           | 20(1)           | 23(1)           | -4(1)           | 8(1)            | -2(1)           |
| O(2)  | 42(1)           | 32(1)           | 44(1)           | 11(1)           | 9(1)            | -2(1)           |
| O(3)  | 34(1)           | 32(1)           | 50(1)           | 5(1)            | 8(1)            | -11(1)          |
| C(17) | 42(1)           | 28(1)           | 41(1)           | 6(1)            | 14(1)           | -1(1)           |
| C(18) | 27(1)           | 52(1)           | 53(1)           | -5(1)           | 7(1)            | -3(1)           |
| C(19) | 33(1)           | 62(2)           | 100(2)          | -17(2)          | 12(1)           | 2(1)            |
| C(20) | 34(1)           | 42(1)           | 60(1)           | -6(1)           | 8(1)            | -10(1)          |

Table 5. Hydrogen coordinates (  $\times 10^4$ ) and isotropic displacement parameters ( $\text{\AA}^2 \times 10^{-3}$ ) for No1.

|        | x     | y    | z     | U(eq) |
|--------|-------|------|-------|-------|
| H(3)   | -3372 | 7719 | -2177 | 44    |
| H(4)   | -5056 | 7266 | -2103 | 51    |
| H(5)   | -5270 | 6075 | -495  | 52    |
| H(6)   | -3840 | 5276 | 871   | 45    |
| H(11)  | 1122  | 3925 | 4281  | 39    |
| H(12)  | 2669  | 4656 | 4588  | 42    |
| H(14)  | 1151  | 6516 | 1574  | 35    |
| H(17A) | -326  | 3173 | 2613  | 54    |
| H(17B) | -1495 | 3285 | 2879  | 54    |
| H(17C) | -527  | 3494 | 4513  | 54    |
| H(18)  | 3076  | 6426 | 2071  | 53    |
| H(19A) | 4682  | 6069 | 3828  | 98    |
| H(19B) | 4079  | 5257 | 2982  | 98    |
| H(19C) | 4145  | 5486 | 5067  | 98    |
| H(20A) | 3068  | 6720 | 5789  | 68    |
| H(20B) | 2414  | 7236 | 4115  | 68    |
| H(20C) | 3663  | 7273 | 4582  | 68    |

Table 6. Torsion angles [°] for No1.

---

|                        |             |
|------------------------|-------------|
| C(16)-O(1)-C(1)-O(2)   | -175.52(16) |
| C(16)-O(1)-C(1)-C(2)   | 5.0(2)      |
| O(2)-C(1)-C(2)-C(3)    | -4.0(3)     |
| O(1)-C(1)-C(2)-C(3)    | 175.39(16)  |
| O(2)-C(1)-C(2)-C(7)    | 177.76(18)  |
| O(1)-C(1)-C(2)-C(7)    | -2.9(2)     |
| C(7)-C(2)-C(3)-C(4)    | 1.4(3)      |
| C(1)-C(2)-C(3)-C(4)    | -176.87(18) |
| C(2)-C(3)-C(4)-C(5)    | 1.3(3)      |
| C(3)-C(4)-C(5)-C(6)    | -2.4(3)     |
| C(4)-C(5)-C(6)-C(7)    | 0.8(3)      |
| C(5)-C(6)-C(7)-C(2)    | 1.9(3)      |
| C(5)-C(6)-C(7)-C(8)    | 179.94(18)  |
| C(3)-C(2)-C(7)-C(6)    | -3.0(3)     |
| C(1)-C(2)-C(7)-C(6)    | 175.23(17)  |
| C(3)-C(2)-C(7)-C(8)    | 178.84(17)  |
| C(1)-C(2)-C(7)-C(8)    | -3.0(2)     |
| C(6)-C(7)-C(8)-C(16)   | -171.11(18) |
| C(2)-C(7)-C(8)-C(16)   | 6.9(2)      |
| C(6)-C(7)-C(8)-C(9)    | 11.5(3)     |
| C(2)-C(7)-C(8)-C(9)    | -170.47(16) |
| C(16)-C(8)-C(9)-O(3)   | -173.29(17) |
| C(7)-C(8)-C(9)-O(3)    | 4.1(3)      |
| C(16)-C(8)-C(9)-N(1)   | 5.2(2)      |
| C(7)-C(8)-C(9)-N(1)    | -177.41(15) |
| O(3)-C(9)-N(1)-C(10)   | -179.02(16) |
| C(8)-C(9)-N(1)-C(10)   | 2.5(2)      |
| O(3)-C(9)-N(1)-C(17)   | 1.2(3)      |
| C(8)-C(9)-N(1)-C(17)   | -177.28(16) |
| C(9)-N(1)-C(10)-C(11)  | 173.69(16)  |
| C(17)-N(1)-C(10)-C(11) | -6.6(2)     |
| C(9)-N(1)-C(10)-C(15)  | -6.8(2)     |
| C(17)-N(1)-C(10)-C(15) | 172.98(16)  |
| N(1)-C(10)-C(11)-C(12) | 179.70(16)  |



|                         |             |
|-------------------------|-------------|
| C(15)-C(10)-C(11)-C(12) | 0.2(3)      |
| C(10)-C(11)-C(12)-C(13) | -0.8(3)     |
| C(11)-C(12)-C(13)-C(14) | 0.4(3)      |
| C(11)-C(12)-C(13)-C(18) | 178.46(19)  |
| C(12)-C(13)-C(14)-C(15) | 0.7(3)      |
| C(18)-C(13)-C(14)-C(15) | -177.48(17) |
| C(13)-C(14)-C(15)-C(10) | -1.4(3)     |
| C(13)-C(14)-C(15)-C(16) | 176.57(17)  |
| N(1)-C(10)-C(15)-C(14)  | -178.66(16) |
| C(11)-C(10)-C(15)-C(14) | 0.9(2)      |
| N(1)-C(10)-C(15)-C(16)  | 3.3(2)      |
| C(11)-C(10)-C(15)-C(16) | -177.16(16) |
| C(7)-C(8)-C(16)-O(1)    | -5.2(3)     |
| C(9)-C(8)-C(16)-O(1)    | 172.37(15)  |
| C(7)-C(8)-C(16)-C(15)   | 173.66(16)  |
| C(9)-C(8)-C(16)-C(15)   | -8.8(3)     |
| C(1)-O(1)-C(16)-C(8)    | -1.0(2)     |
| C(1)-O(1)-C(16)-C(15)   | -179.98(15) |
| C(14)-C(15)-C(16)-C(8)  | -173.41(17) |
| C(10)-C(15)-C(16)-C(8)  | 4.6(3)      |
| C(14)-C(15)-C(16)-O(1)  | 5.5(2)      |
| C(10)-C(15)-C(16)-O(1)  | -176.48(14) |
| C(14)-C(13)-C(18)-C(19) | -161.8(2)   |
| C(12)-C(13)-C(18)-C(19) | 20.1(3)     |
| C(14)-C(13)-C(18)-C(20) | 70.7(3)     |
| C(12)-C(13)-C(18)-C(20) | -107.4(2)   |

---

Symmetry transformations used to generate equivalent atoms:
